# Supplementary material
Source: publisher figshare collection journal article supplement (https://acs.figshare.com/ndownloader/files/12560213)

## Supporting Information

# Selective Long-Distance Isomerization of Terminal Alkenes via Nondissociative Chain Walking

Yuya Yamasaki, Takaaki Kumagai, Shota Kanno, Fumitoshi Kakiuchi, and  
Takuya Kochi\*

*Department of Chemistry, Faculty of Science and Technology, Keio University,  
3-14-1 Hiyoshi, Kohoku-ku, Yokohama, Kanagawa 223-8522, Japan.*

[kochi@chem.keio.ac.jp](mailto:kochi@chem.keio.ac.jp)

## Table of Contents

|      |                                                                       |     |
|------|-----------------------------------------------------------------------|-----|
| I.   | Optimization of the Reaction Conditions .....                         | S2  |
| II.  | Determination of Enantiomeric Excess of <b>3q</b> and <b>1q</b> ..... | S3  |
| III. | NMR Spectra .....                                                     | S11 |

## I. Optimization of the Reaction Conditions

**Table S1** Screening of Complexes

$\text{1b} \xrightarrow[\text{CH}_2\text{ClCH}_2\text{Cl, rt, 3 h}]{\begin{matrix} 2.5 \text{ mol \% (L)PdMeCl } \mathbf{2} \\ 3 \text{ mol \% NaBARf}_4 \\ \text{MS 4A} \end{matrix}} \text{3b}$

| entry | complex [L]                                   | GC yield (%) | E/Z   |
|-------|-----------------------------------------------|--------------|-------|
| 1     | <b>2a</b> [1,10-phenanthroline]               | 77           | 34/66 |
| 2     | <b>2b</b> [3,4,7,8-tetramethylphenanthroline] | 70           | 34/66 |
| 3     | <b>2c</b> [2,2'-bipyridine]                   | 63           | 35/65 |
| 4     | <b>2d</b> [2,9-dimethylphenanthroline]        | 73           | 34/66 |

<sup>a</sup>Reaction conditions: **1b** (0.1 mmol), **2** (0.0025 mmol), NaBAR<sub>4</sub><sup>f</sup> (0.003 mmol), CH<sub>2</sub>ClCH<sub>2</sub>Cl (5 mL), rt.

**Table S2** Screening of the Reaction Conditions

$\text{1b} \xrightarrow[\text{CH}_2\text{ClCH}_2\text{Cl, temp, 3 h}]{\begin{matrix} \text{cat. } \mathbf{2a} \\ \text{NaBARf}_4 \text{ 1.2 eq to Pd cat.} \\ \text{MS 4A} \end{matrix}} \text{3b}$

| Entry           | <b>2a</b> (mol %) | CH <sub>2</sub> Cl <sub>2</sub> (mL) | temp (°C) | GC yield (%) | E/Z   |
|-----------------|-------------------|--------------------------------------|-----------|--------------|-------|
| 1               | 2.5               | 5                                    | rt        | 77           | 34/66 |
| 2               | 1.0               | 5                                    | rt        | 71           | 35/65 |
| 3               | 5.0               | 5                                    | rt        | 65           | 33/67 |
| 4               | 2.5               | 3                                    | rt        | 69           | 34/66 |
| 5               | 2.5               | 10                                   | rt        | 66           | 35/65 |
| 6               | 2.5               | 5                                    | 40        | 55           | 36/64 |
| 7               | 2.5               | 5                                    | 0         | 80           | 27/73 |
| 8               | 2.5               | 5                                    | -5        | 64           | 20/80 |
| 9               | 2.5               | 5                                    | -20       | 20           | 32/68 |
| 10 <sup>b</sup> | 2.5               | 5                                    | -20       | 60           | 18/82 |

<sup>a</sup>Reaction conditions: **1b** (0.1 mmol). <sup>b</sup>24 h

## II. Determination of Enantiomeric Excess of **1q** and **3q**

The enantiomeric excess for the substrate (*S*)-**1q** was determined by HPLC analysis of the derivative, dinitrobenzoate (*S*)-**S1**, which was derived in the following procedure from the esterification of the corresponding alcohol (*S*)-**S5** before the silylative protection.

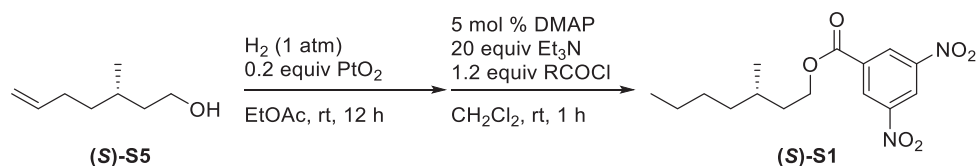

To a Schlenk flask charged with (*S*)-**S5** (27.8 mg, 0.217 mmol) were added EtOAc (2 mL) and platinum oxide (9.1 mg, 0.040 mmol) to form a suspension. A balloon filled with hydrogen gas was attached to the flask, which was then briefly evacuated and backfilled with hydrogen gas three times. The mixture was stirred at room temperature for 12 h. The resulting mixture was filtered through a pad of Celite and concentrated.

The residue was dissolved in CH<sub>2</sub>Cl<sub>2</sub> (15 mL), and DMAP (1.2 mg, 0.098 mmol), 3,5-dinitrobenzoyl chloride (60.6 mg, 0.260 mmol), and Et<sub>3</sub>N (0.6 mL, 4.2 mmol) were added to the solution at room temperature. After stirring for 1 h, the mixture was diluted with dichloromethane and washed twice with brine. The combined organic portions were dried over MgSO<sub>4</sub>, filtered, and concentrated. Silica gel column chromatography (hexane:EtOAc = 10:1) of the crude material afforded dinitrobenzoate **S1** (23.3 mg, 33% yield, 97% ee) as a colorless oil.

The enantiomeric excess was determined by chiral HPLC analysis (Daicel Chiralpak AY-H column, column temperature: 25 °C, eluent; *n*-hexane:EtOH = 98:2, flow rate: 1.0 mL/min,  $\lambda$  = 254 nm;  $t_R$  = 15.1 and 16.3 min).

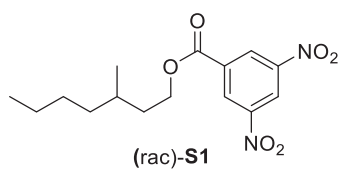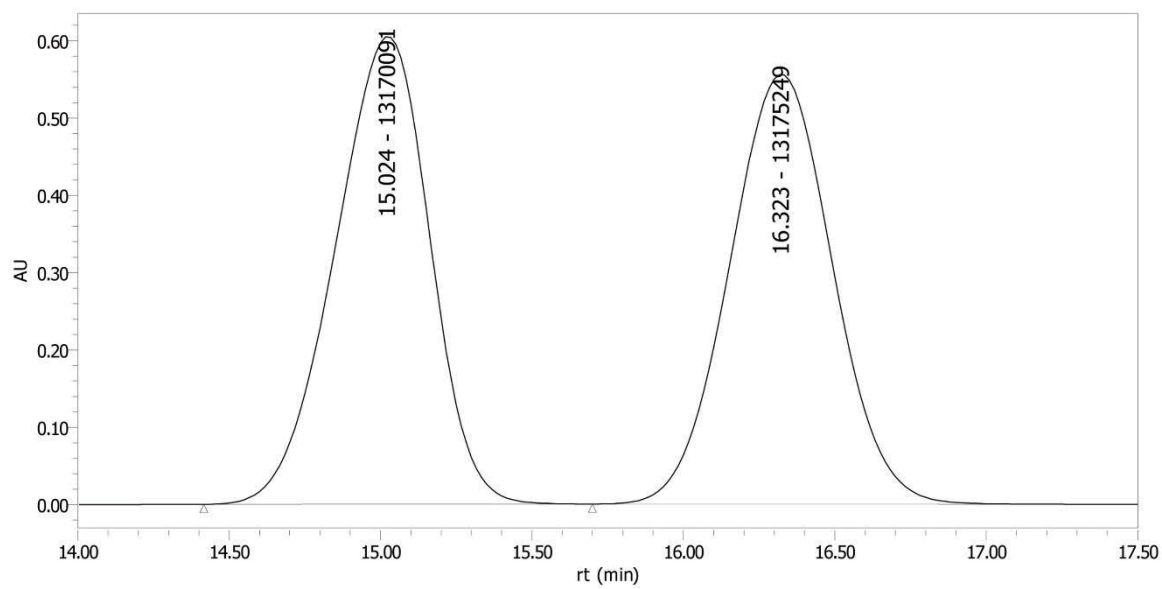

**Figure S1.** HPLC Analysis of (rac)-**S1**

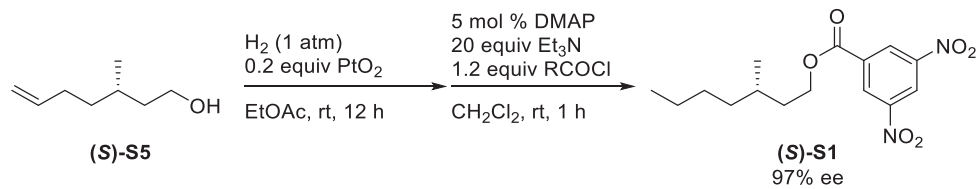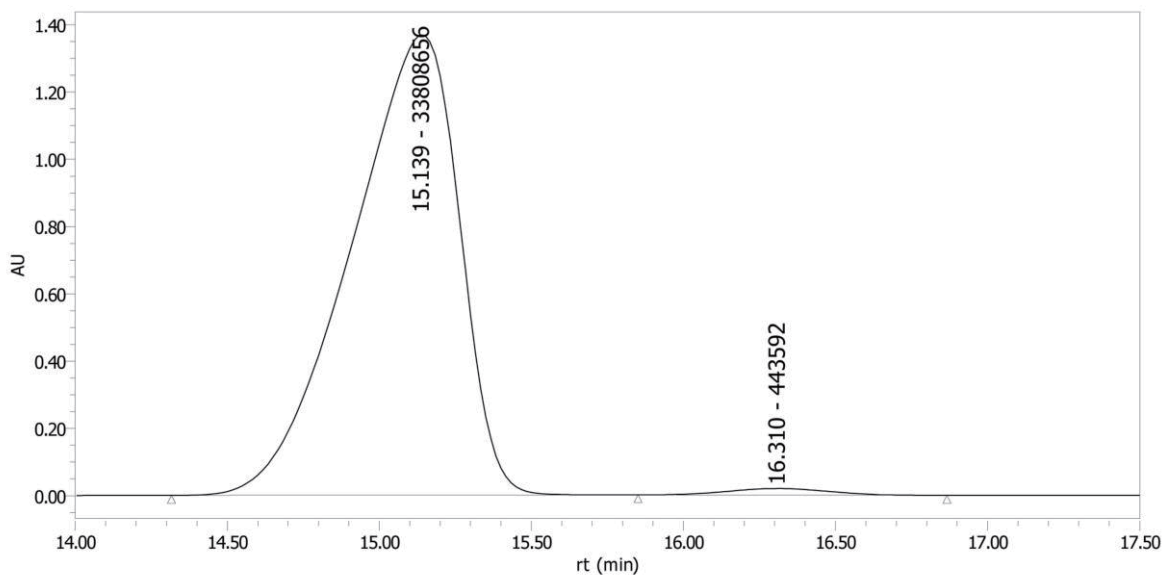

**Figure S2.** HPLC Analysis of (S)-S1 derived from (S)-S5

The enantiomeric excess for **3q** was determined by HPLC analysis of the corresponding esterification product **S1**, which was obtained through the following procedure.

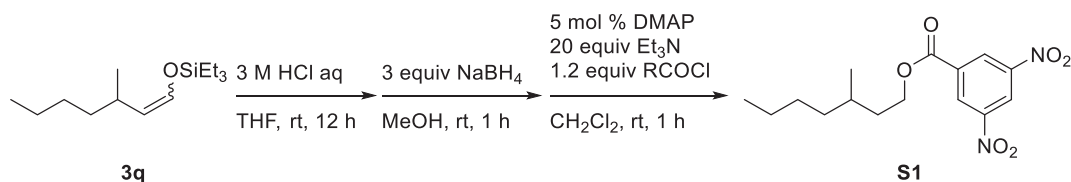

To a solution of **3q** (16.2 mg, 0.067 mmol) in THF (3 mL) was added 3 M hydrochloric acid (2 mL). After stirring for 12 h at room temperature, a saturated aqueous solution of NaHCO<sub>3</sub> was added to the mixture, which was then extracted three times with Et<sub>2</sub>O. The combined organic layers were washed with brine, dried over Na<sub>2</sub>SO<sub>4</sub>, and filtered. Volatile materials were removed carefully by distillation at 60 °C under ambient pressure. The residue was dissolved in MeOH (5 mL), and NaBH<sub>4</sub> (7.6 mg, 0.201 mmol) was added to the solution at 0 °C. The reaction mixture was stirred at room temperature for 3 h. Water and diethyl ether were added to the mixture and the organic layer was collected. The aqueous layer was extracted three times with diethyl ether. The combined organic portions were dried over MgSO<sub>4</sub>, filtered, and concentrated. The residue was dissolved in CH<sub>2</sub>Cl<sub>2</sub> (5 mL), and DMAP (0.4 mg, 0.003 mmol), 3,5-dinitrobenzoyl chloride (18.4 mg, 0.080 mmol), and Et<sub>3</sub>N (0.2 mL, 1.3 mmol) were added to the solution at room temperature. After stirring for 1 h, the mixture was diluted with dichloromethane and washed twice with brine. The combined organic portions were dried over MgSO<sub>4</sub>, filtered, and concentrated. Silica gel column chromatography (hexane:EtOAc = 10:1) of the crude material afforded dinitrobenzoate **S1** (6.0 mg, 0.018 mmol, 28% yield) as a colorless oil: IR (neat): 3105 w, 2960 m, 2930 m, 2872 w, 2858 w, 1740 s, 1735 m, 1731 m, 1628 w, 1550 s, 1545 s, 1544 s, 1542 s, 1541 s, 1462 w, 1344 s, 1282 s, 1170 m, 1076 w, 921 w, 730 m, 721 m cm<sup>-1</sup>; <sup>1</sup>H NMR (400 MHz, CDCl<sub>3</sub>): δ 0.91 (t, *J* = 7.2 Hz, 3H), 0.98 (d, *J* = 6.0 Hz, 3H), 1.20-1.42 (m, 6H), 1.59-1.69 (m, 2H), 1.83-1.91 (m, 1H), 4.45-4.54 (m, 2H), 9.16 (d, *J* = 2.4 Hz, 2H), 9.24 (t, *J* = 2.0 Hz, 1H); <sup>13</sup>C NMR (100 MHz, CDCl<sub>3</sub>): δ 14.1, 19.6, 22.9, 29.1, 29.9, 35.4, 36.5, 65.7, 122.3, 129.4, 134.1, 148.6, 162.5; HRMS (DART-TOF) *m/z*: [M+H]<sup>+</sup> Calcd for C<sub>15</sub>H<sub>21</sub>N<sub>2</sub>O<sub>6</sub> 325.1400; Found 325.1394.

The enantiomeric excess was determined by chiral HPLC analysis (Daicel Chiralpak AY-H column, column temperature: 25 °C, eluent: *n*-hexane:EtOH = 98:2, flow rate: 1.0 mL/min, λ = 254 nm; *t*<sub>R</sub> = 15.0 and 16.3 min).

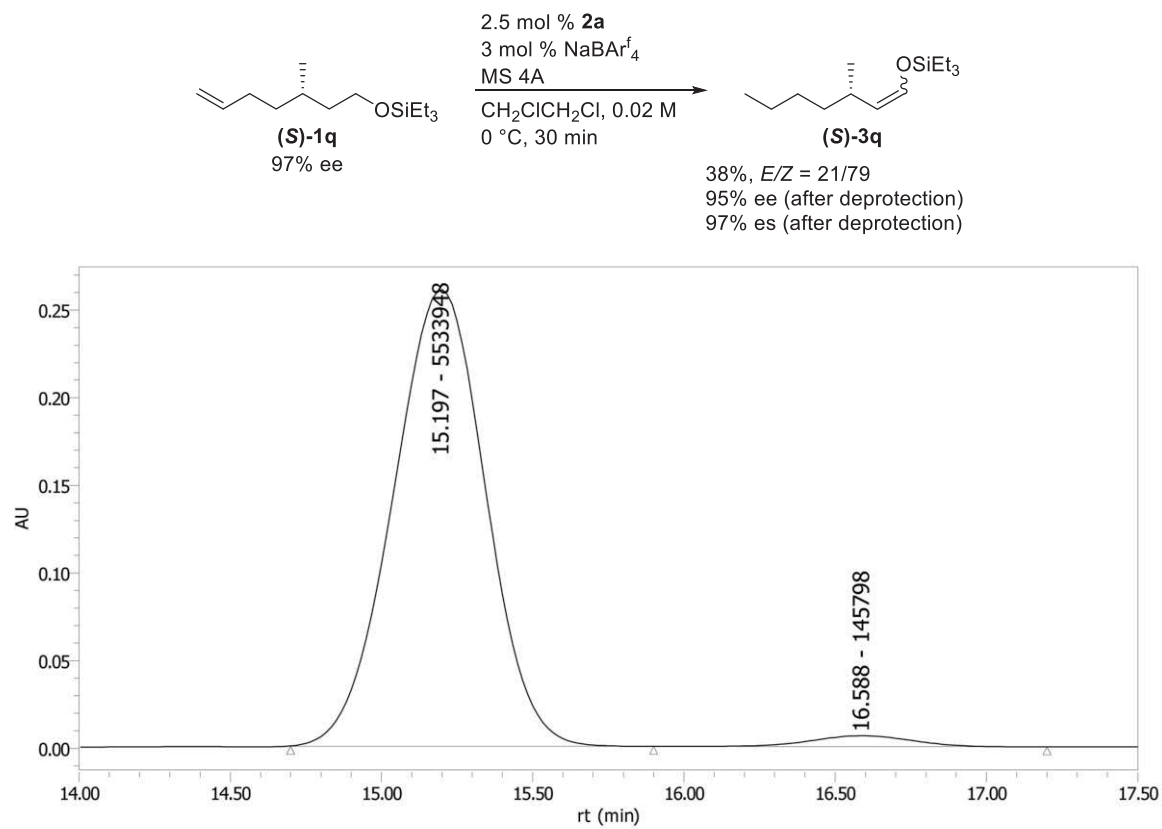

**Figure S3.** HPLC Analysis of (S)-3q (reaction conditions: standard)

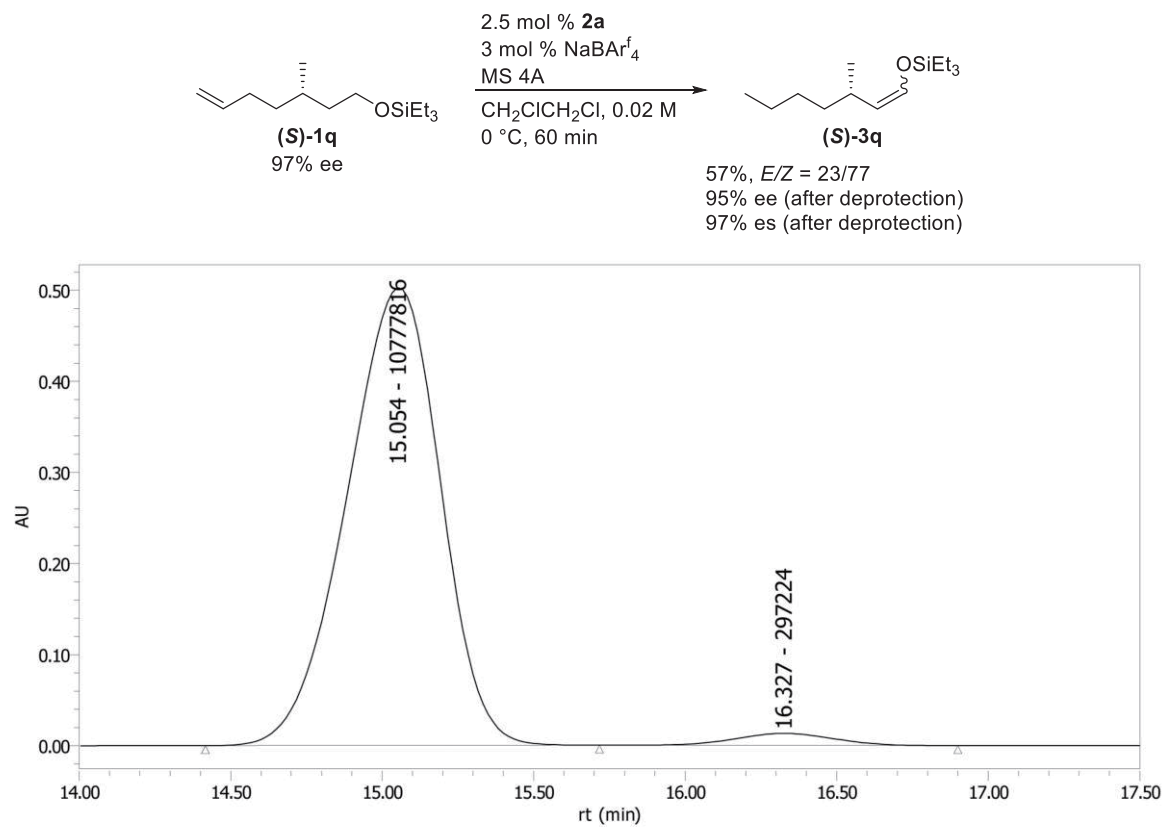

**Figure S4.** HPLC Analysis of **(S)-3q** (reaction conditions: standard except that the reaction time was 60 min)



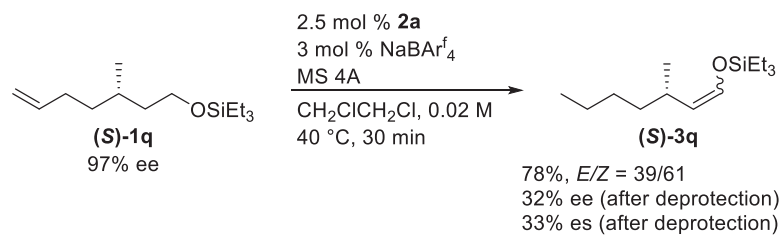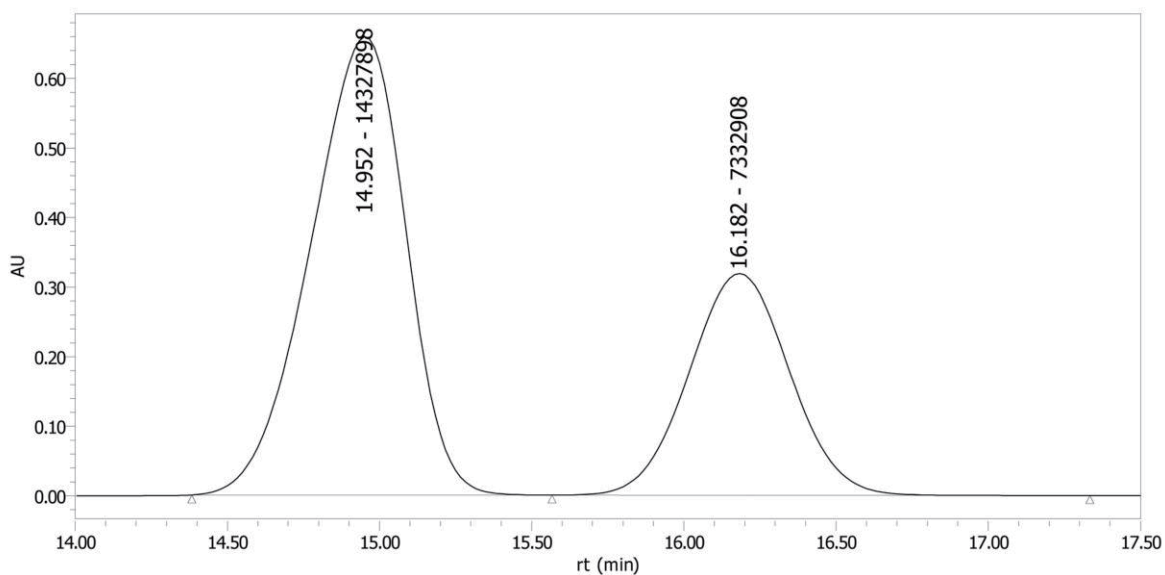

**Figure S5.** HPLC Analysis of (S)-3q (reaction conditions: standard except that the reaction temperature was 40 °C)

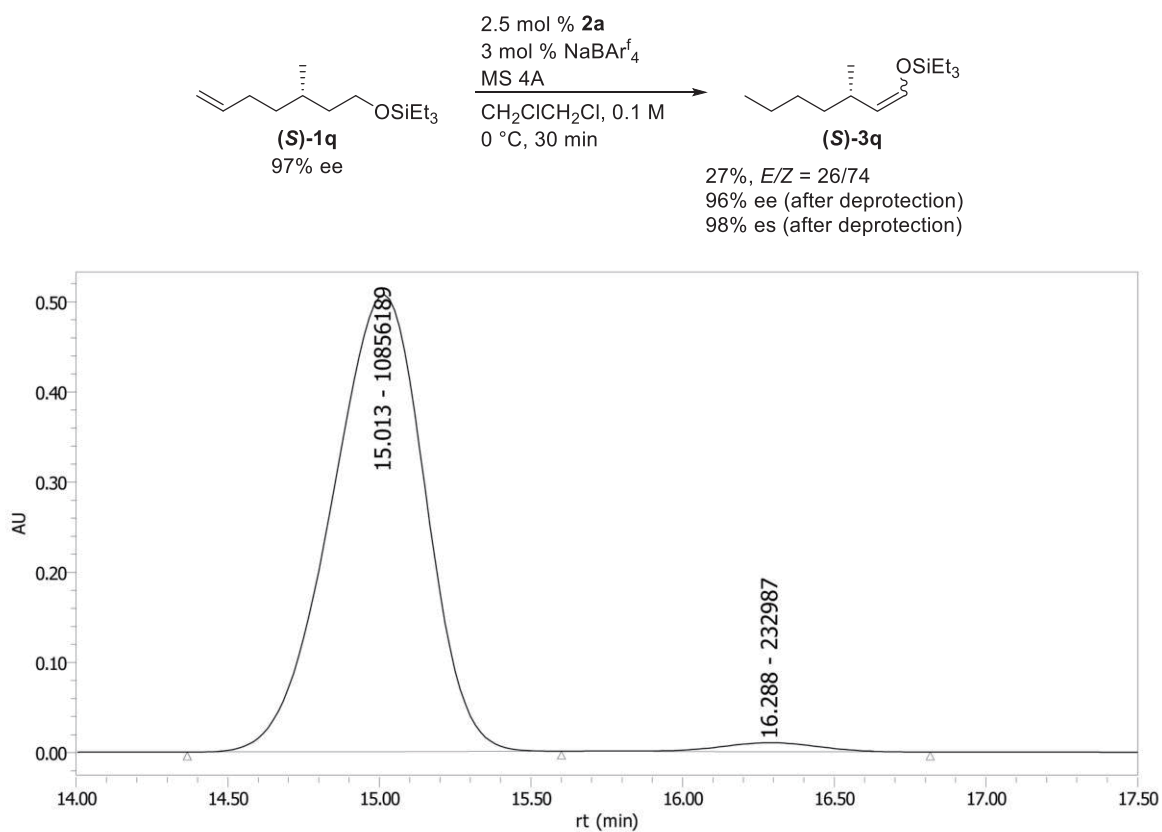

**Figure S6.** HPLC Analysis of (*S*)-**3q** (reaction conditions: standard except that the concentration was 0.1 M)

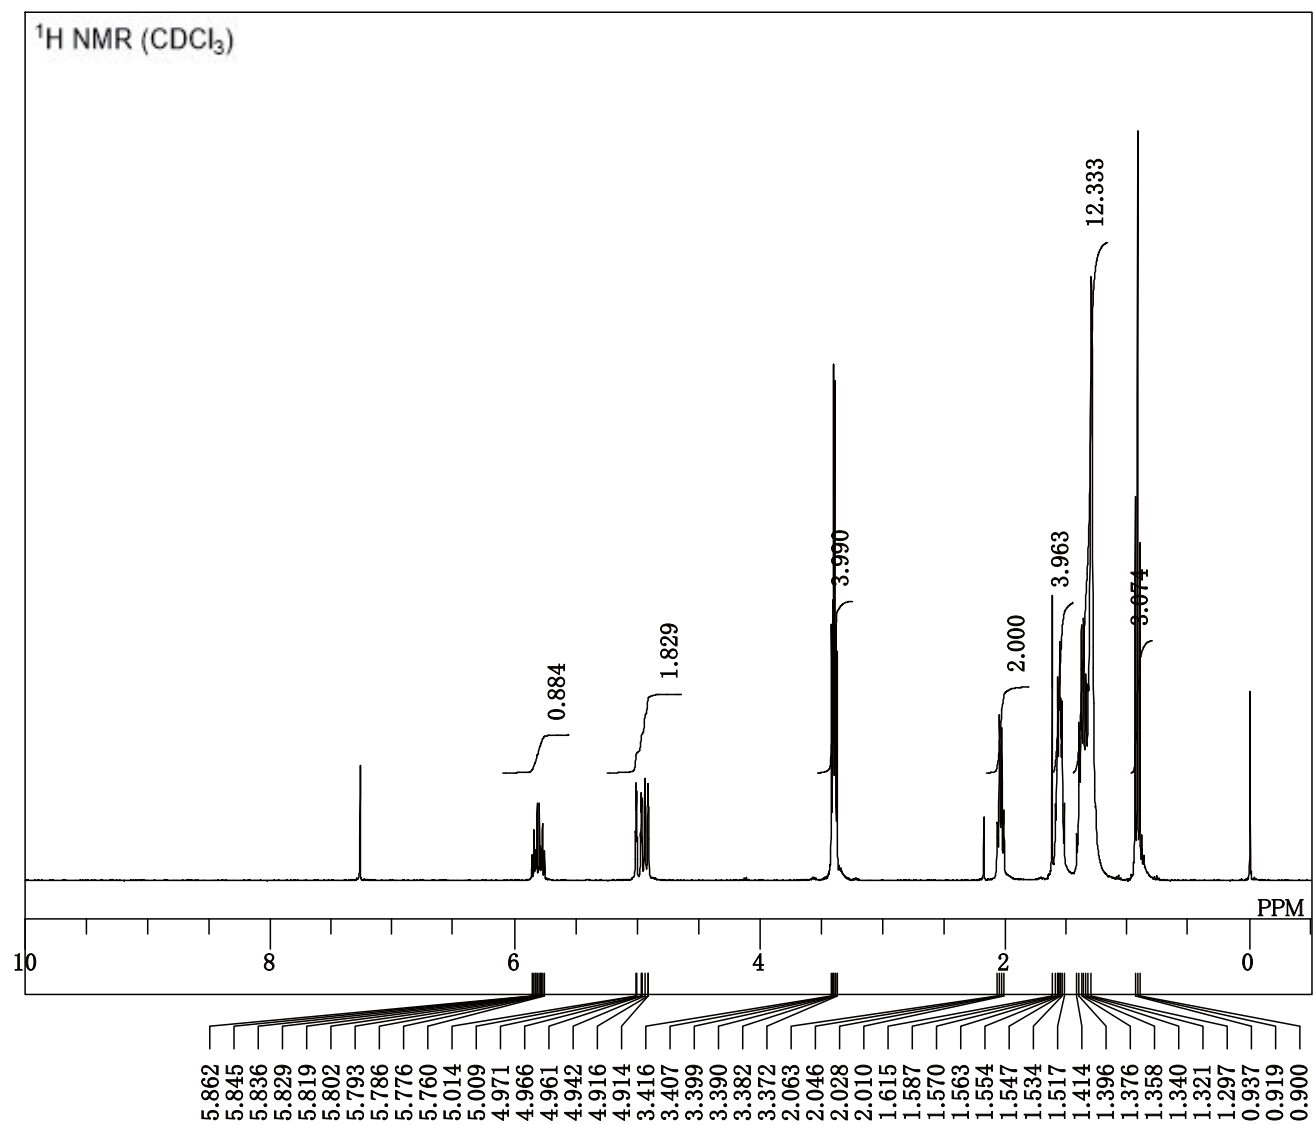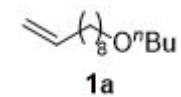

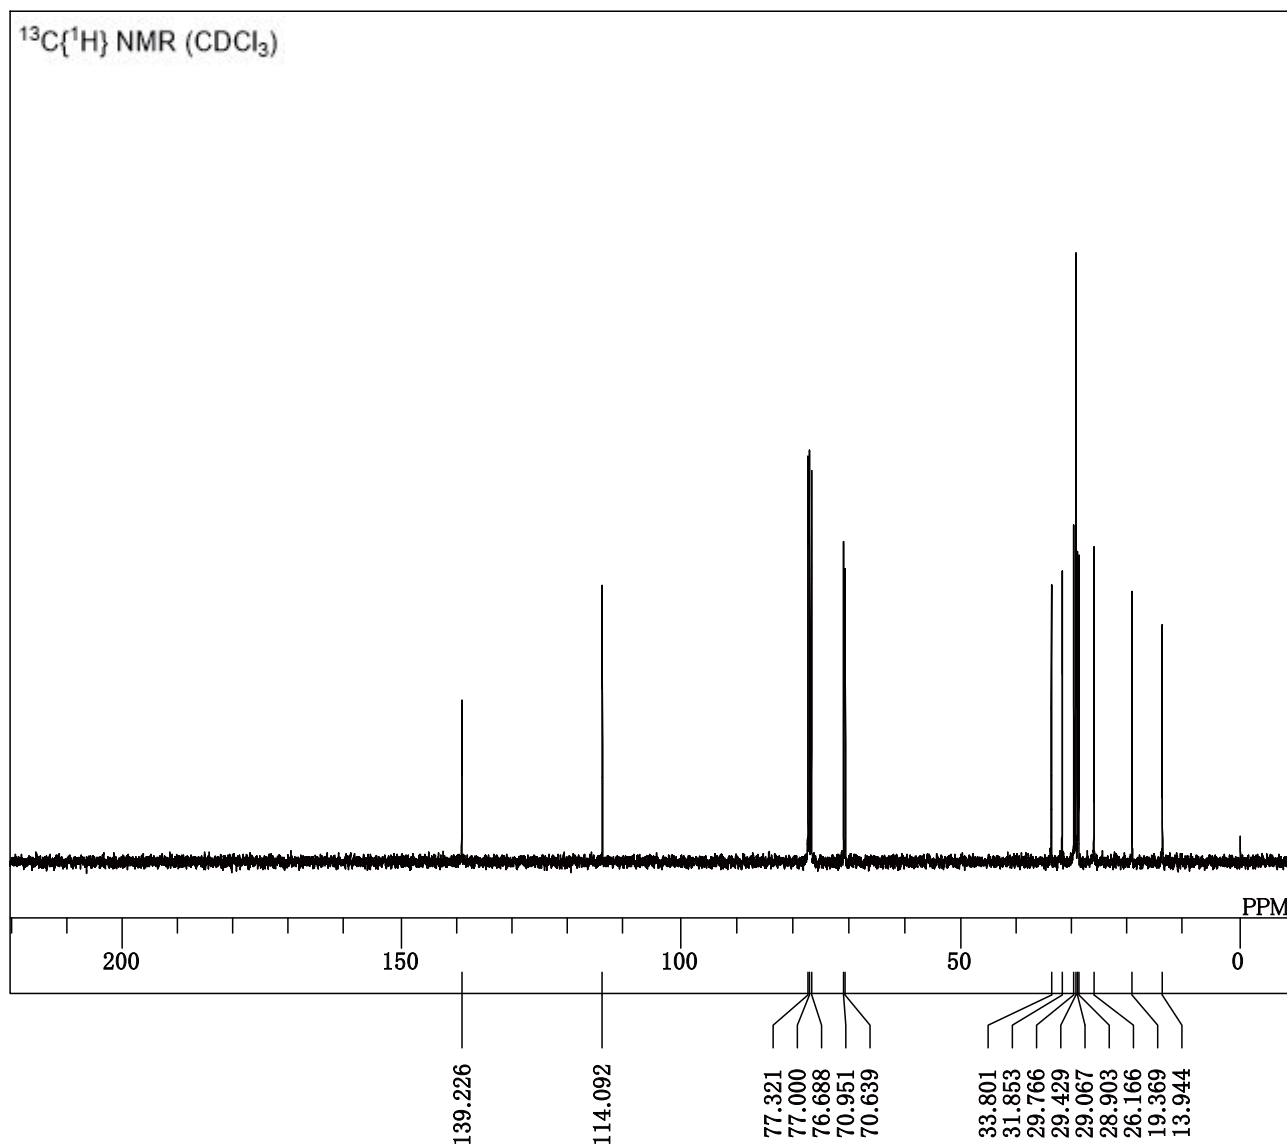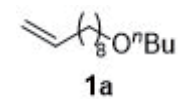

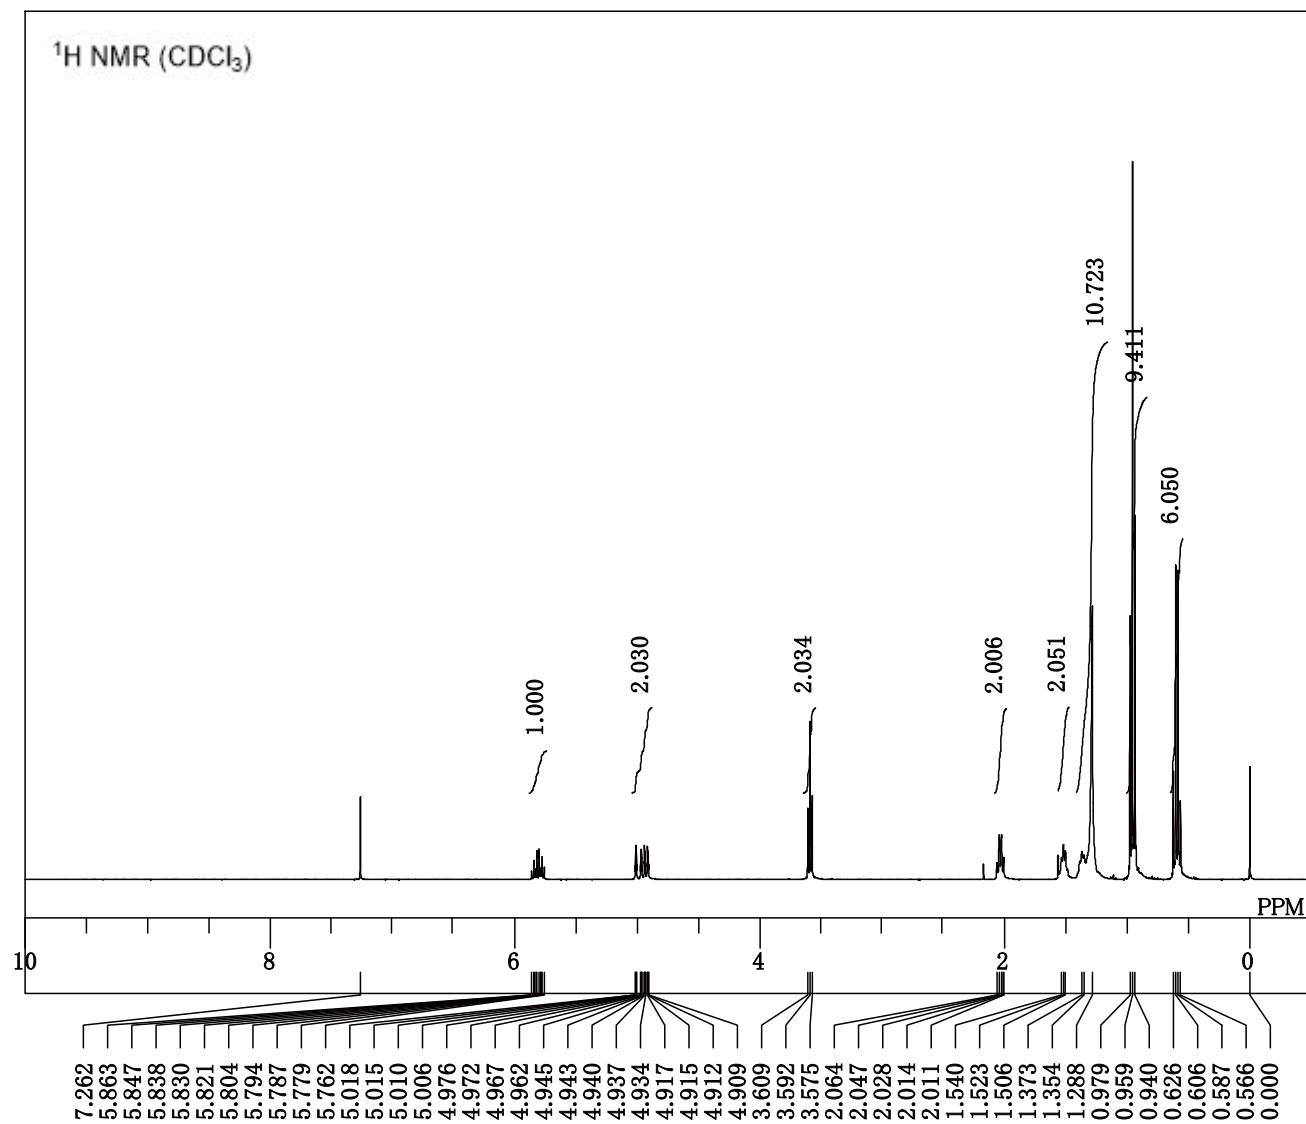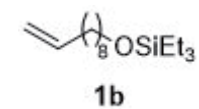

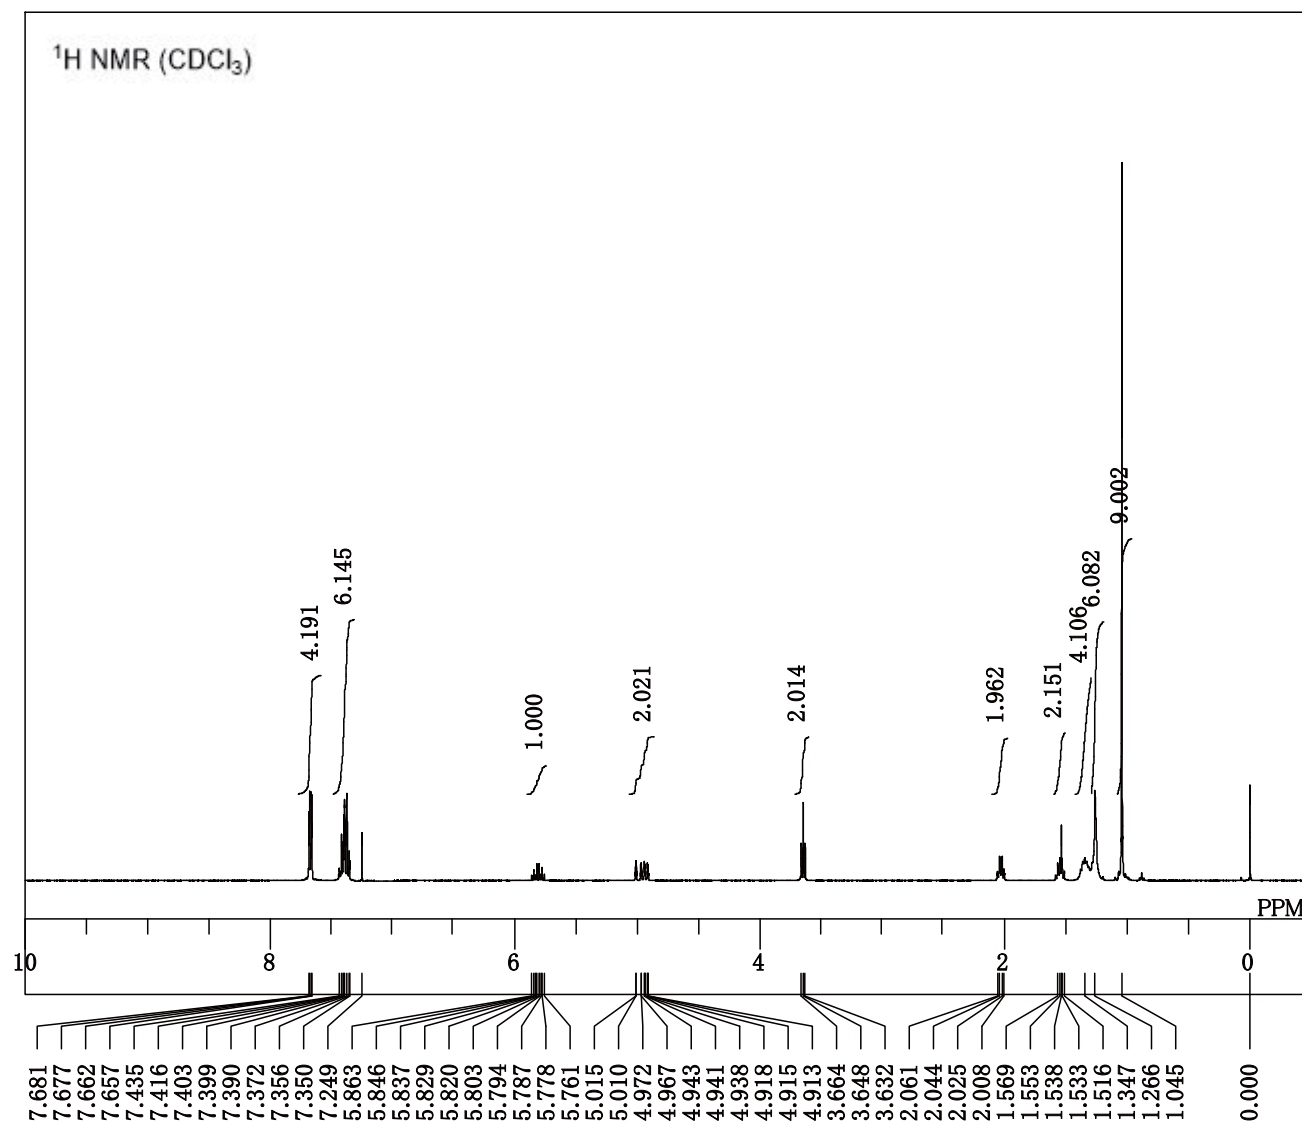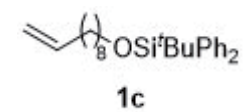

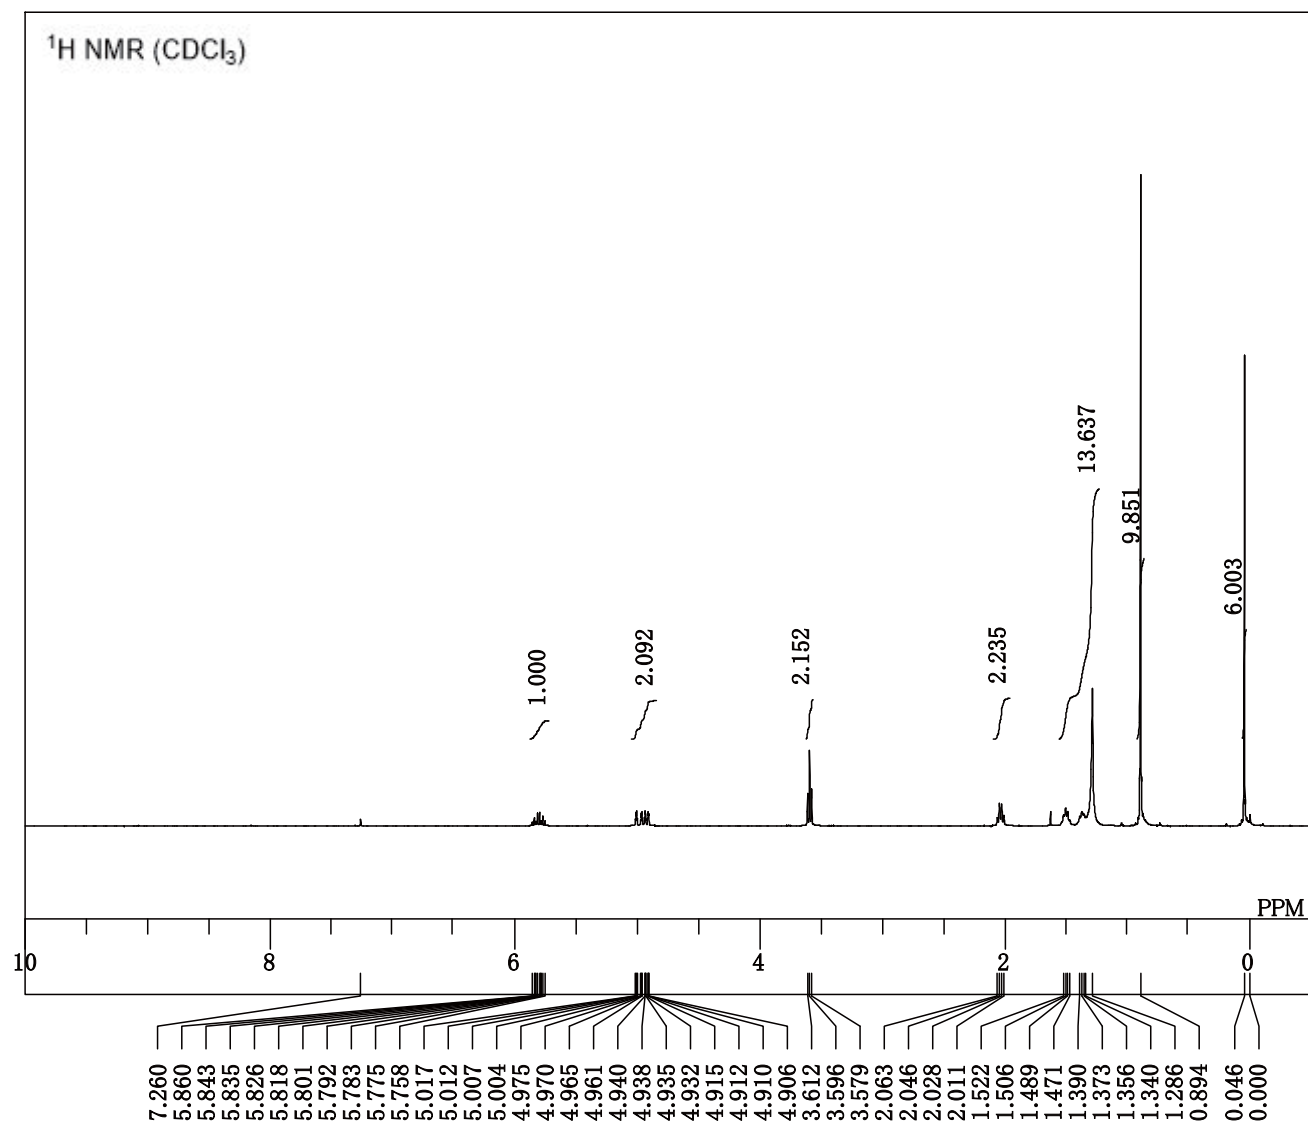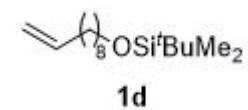

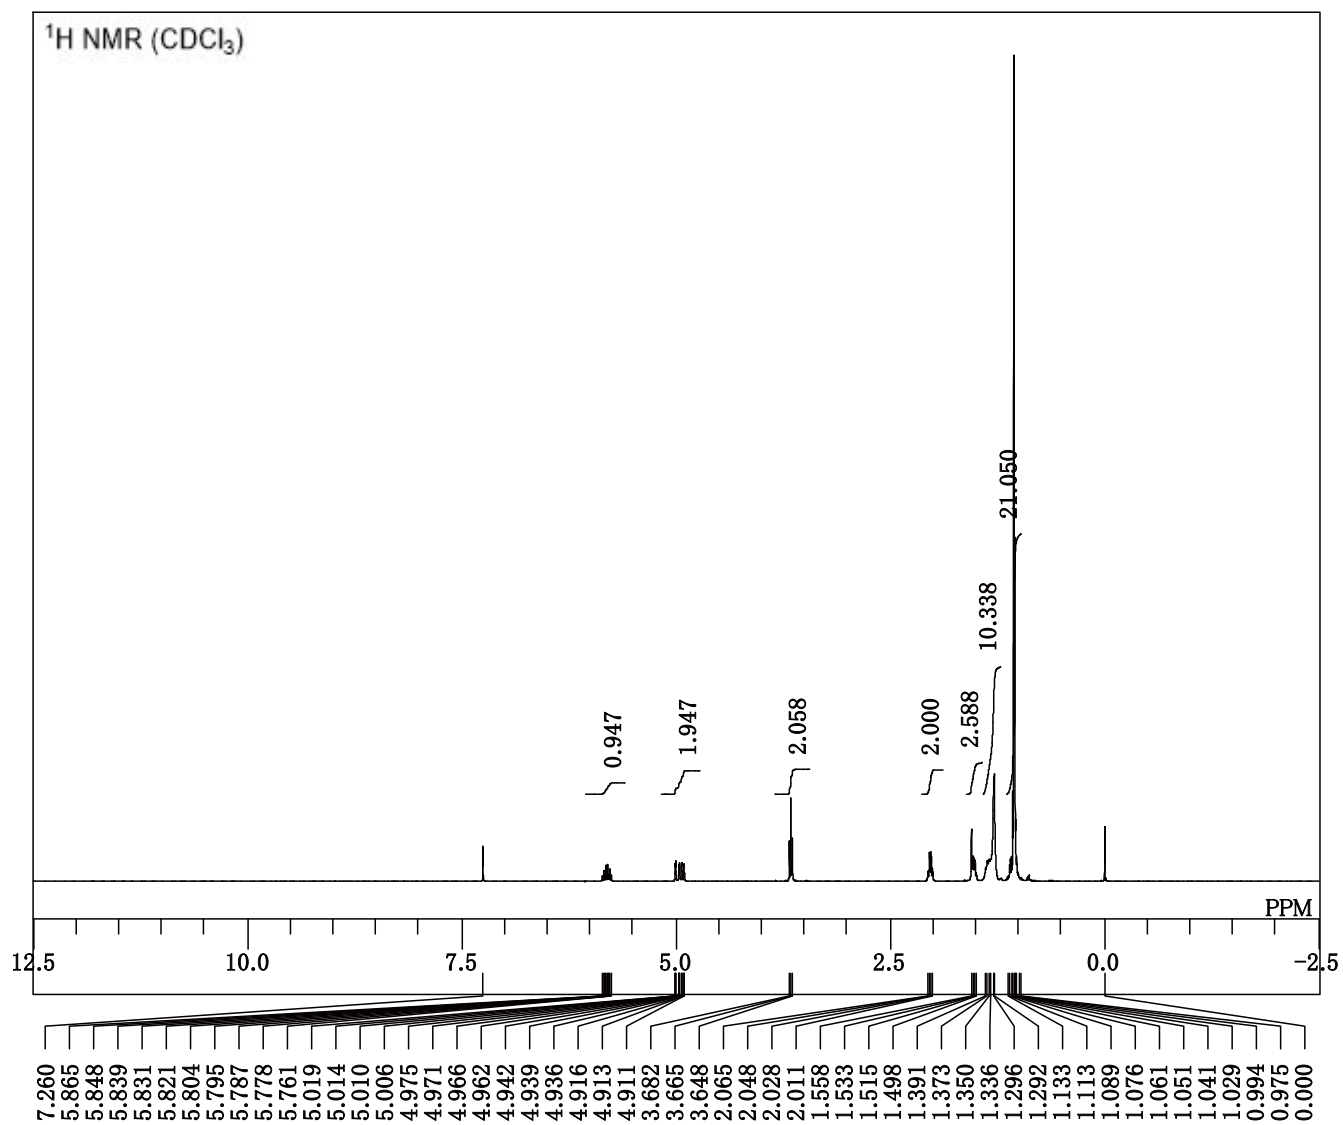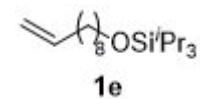



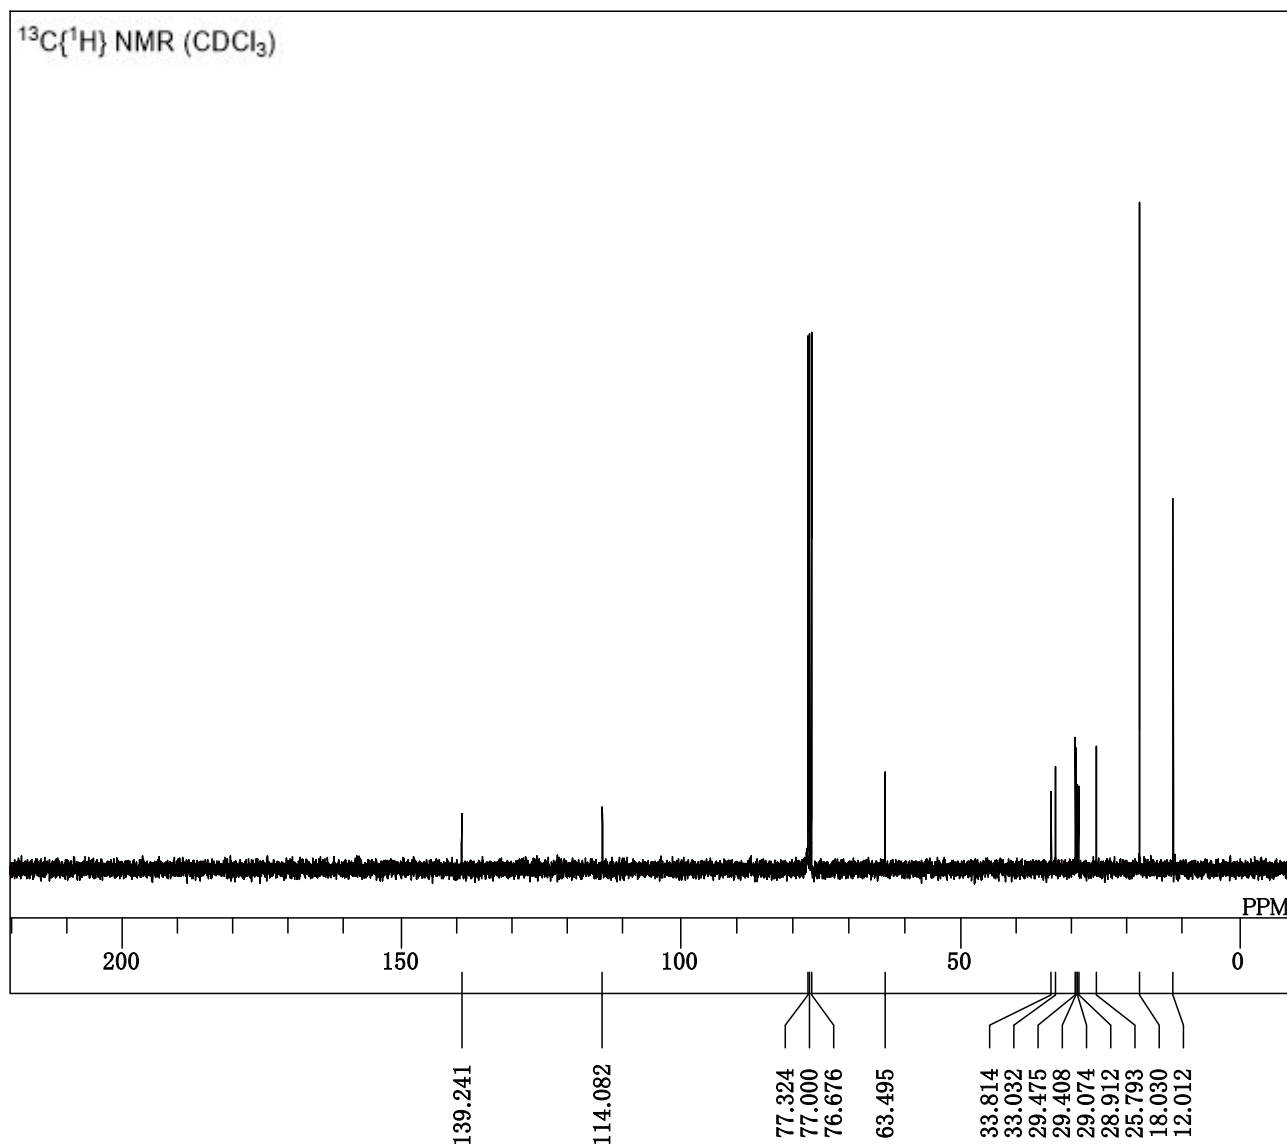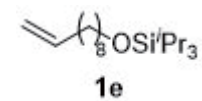

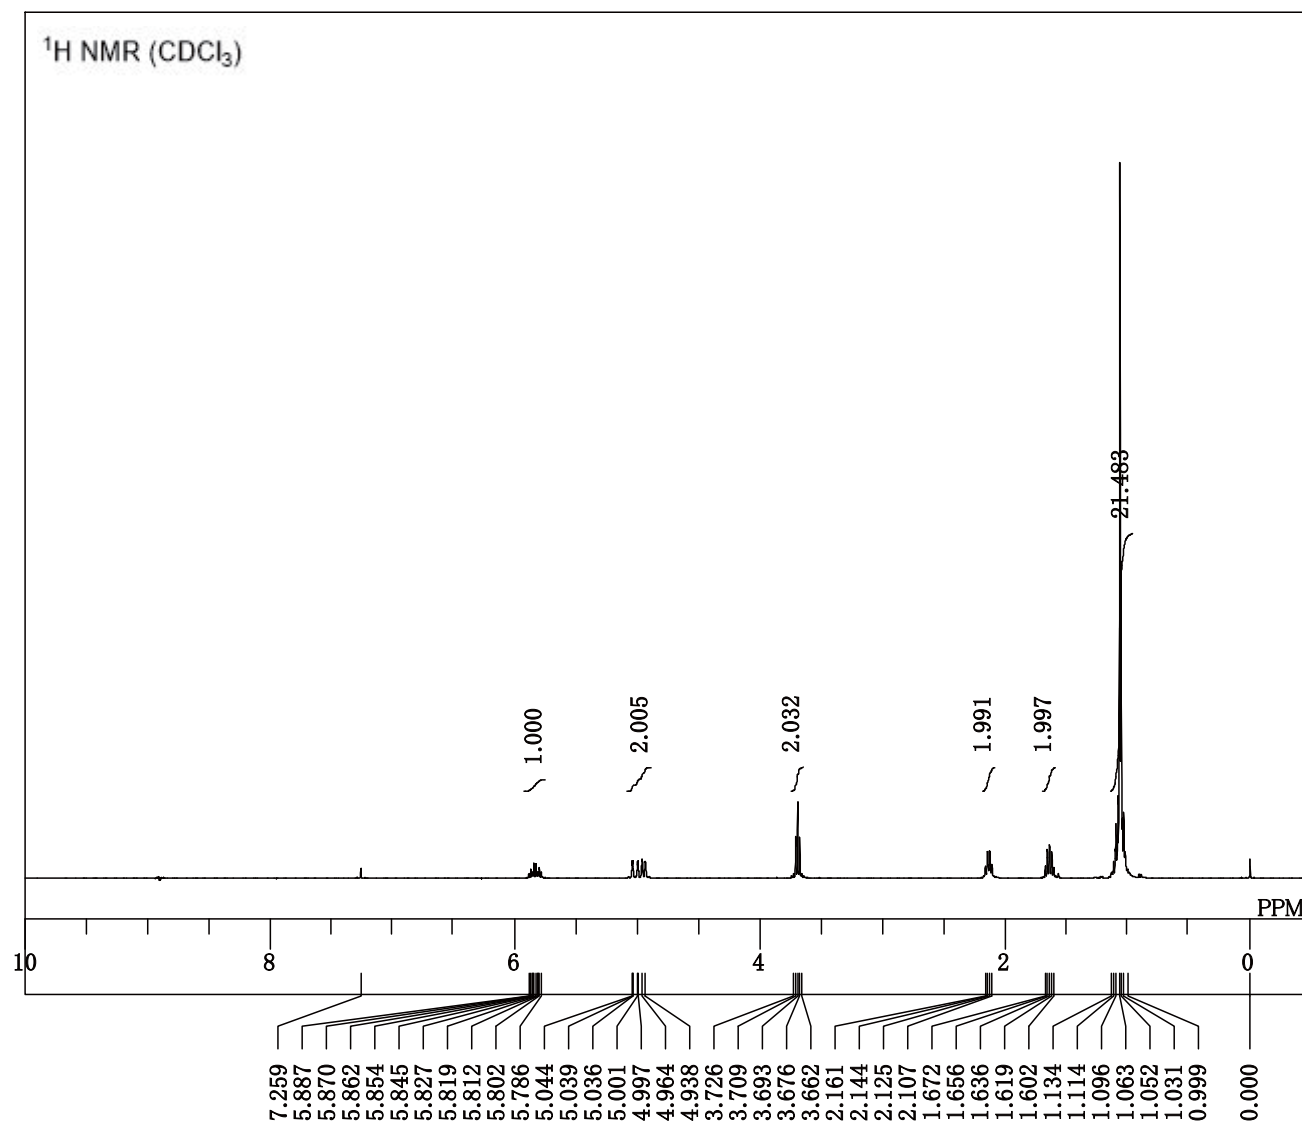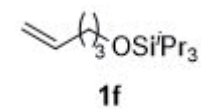

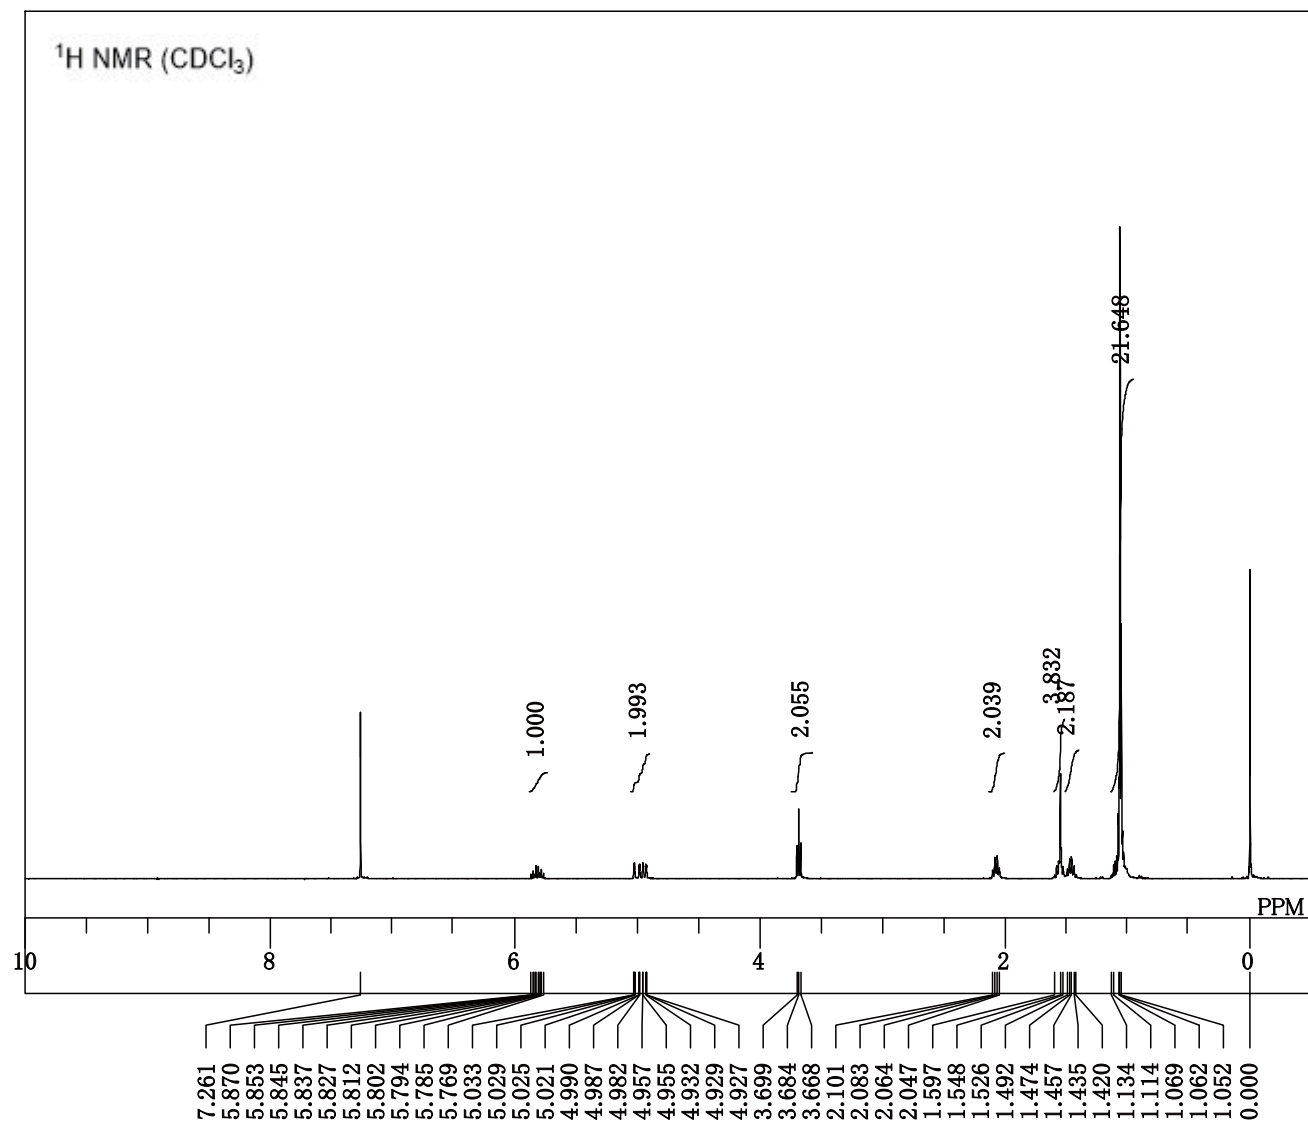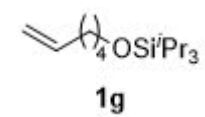

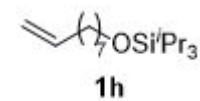

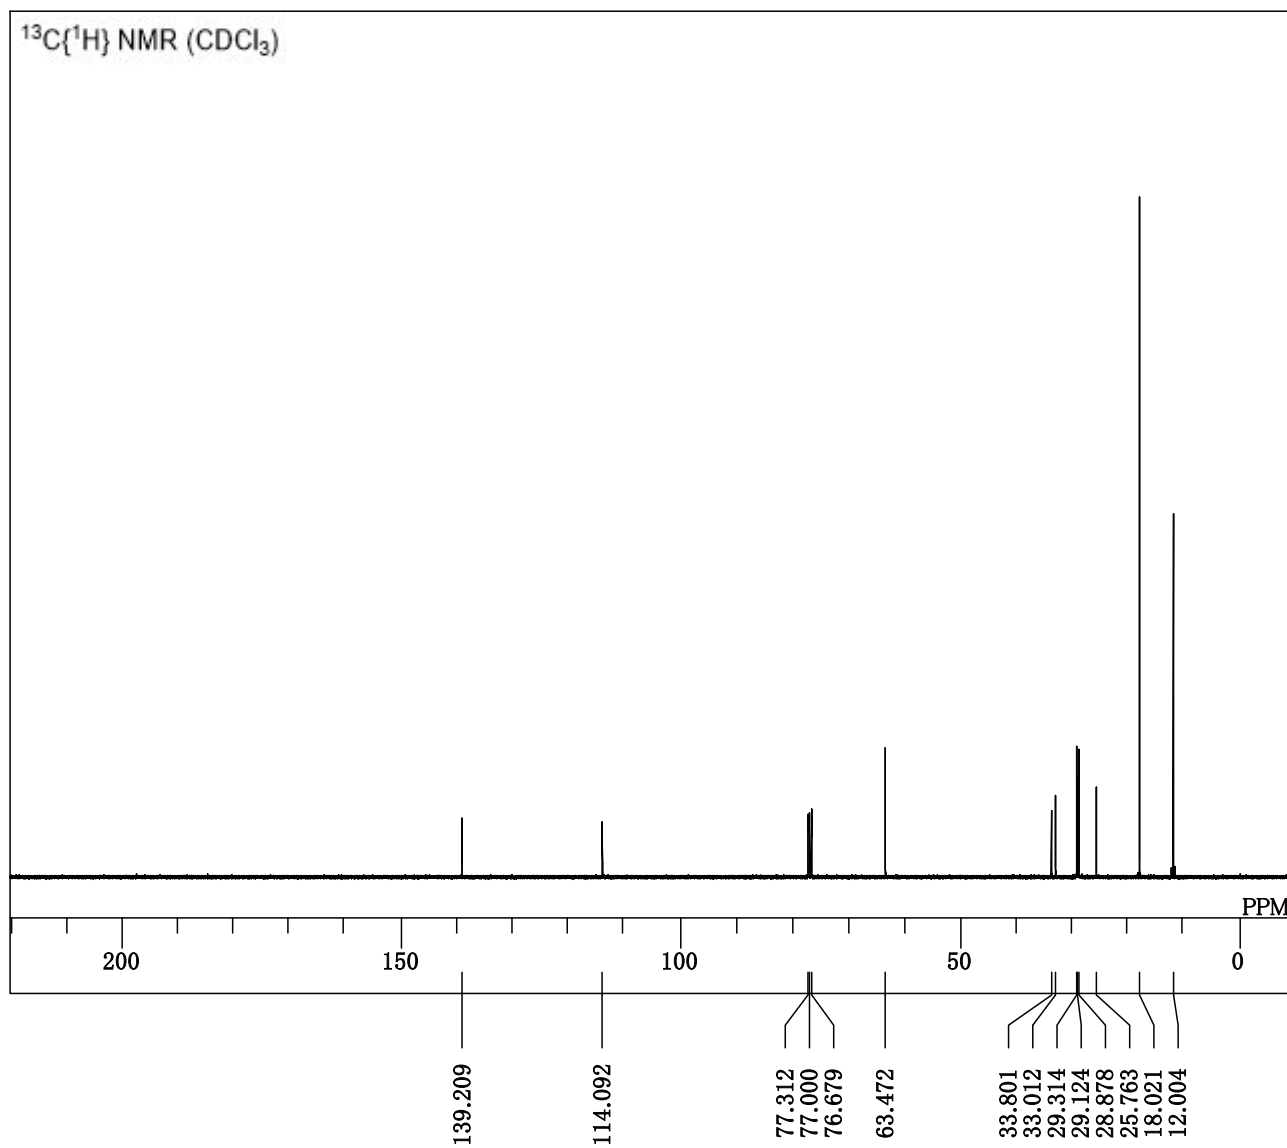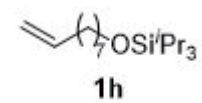

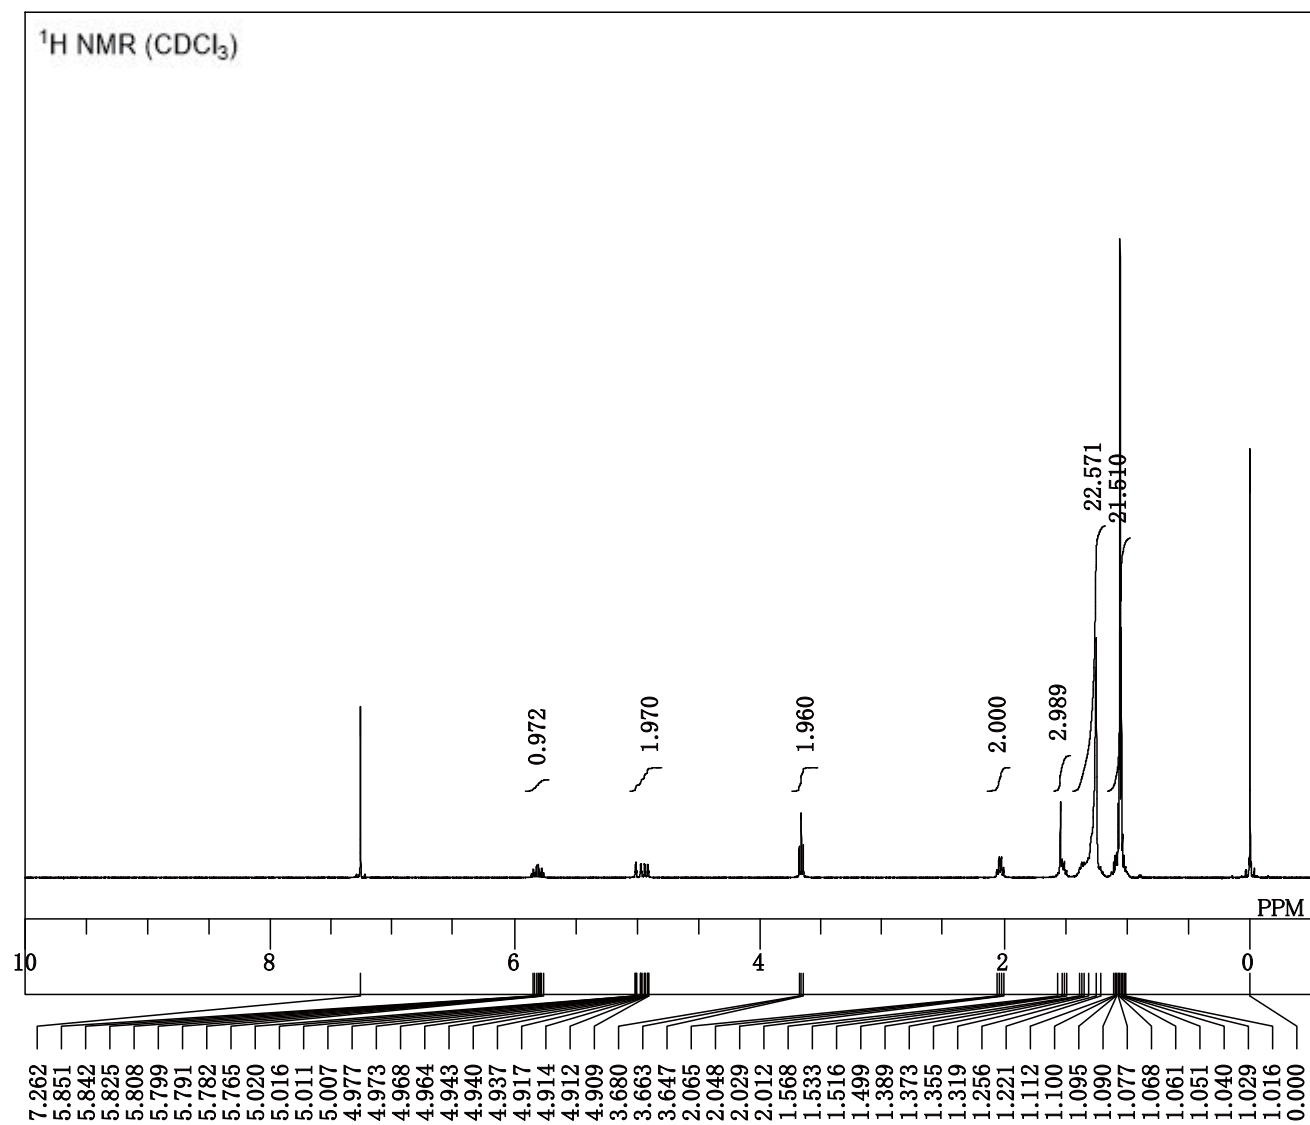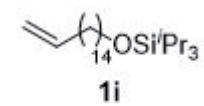

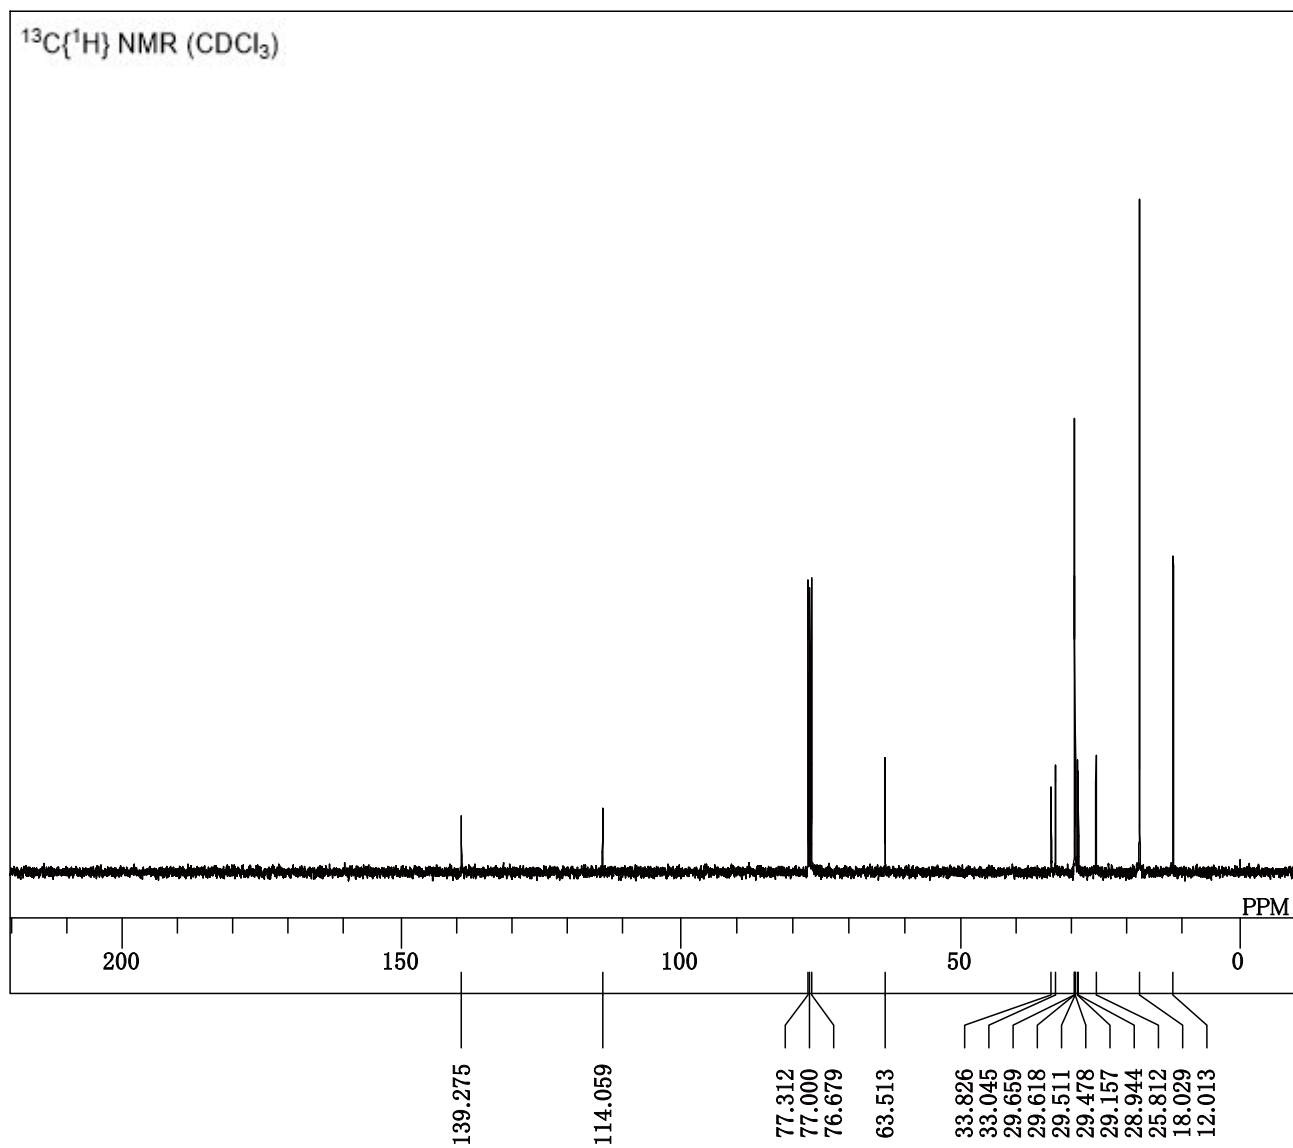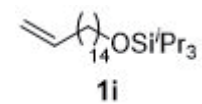

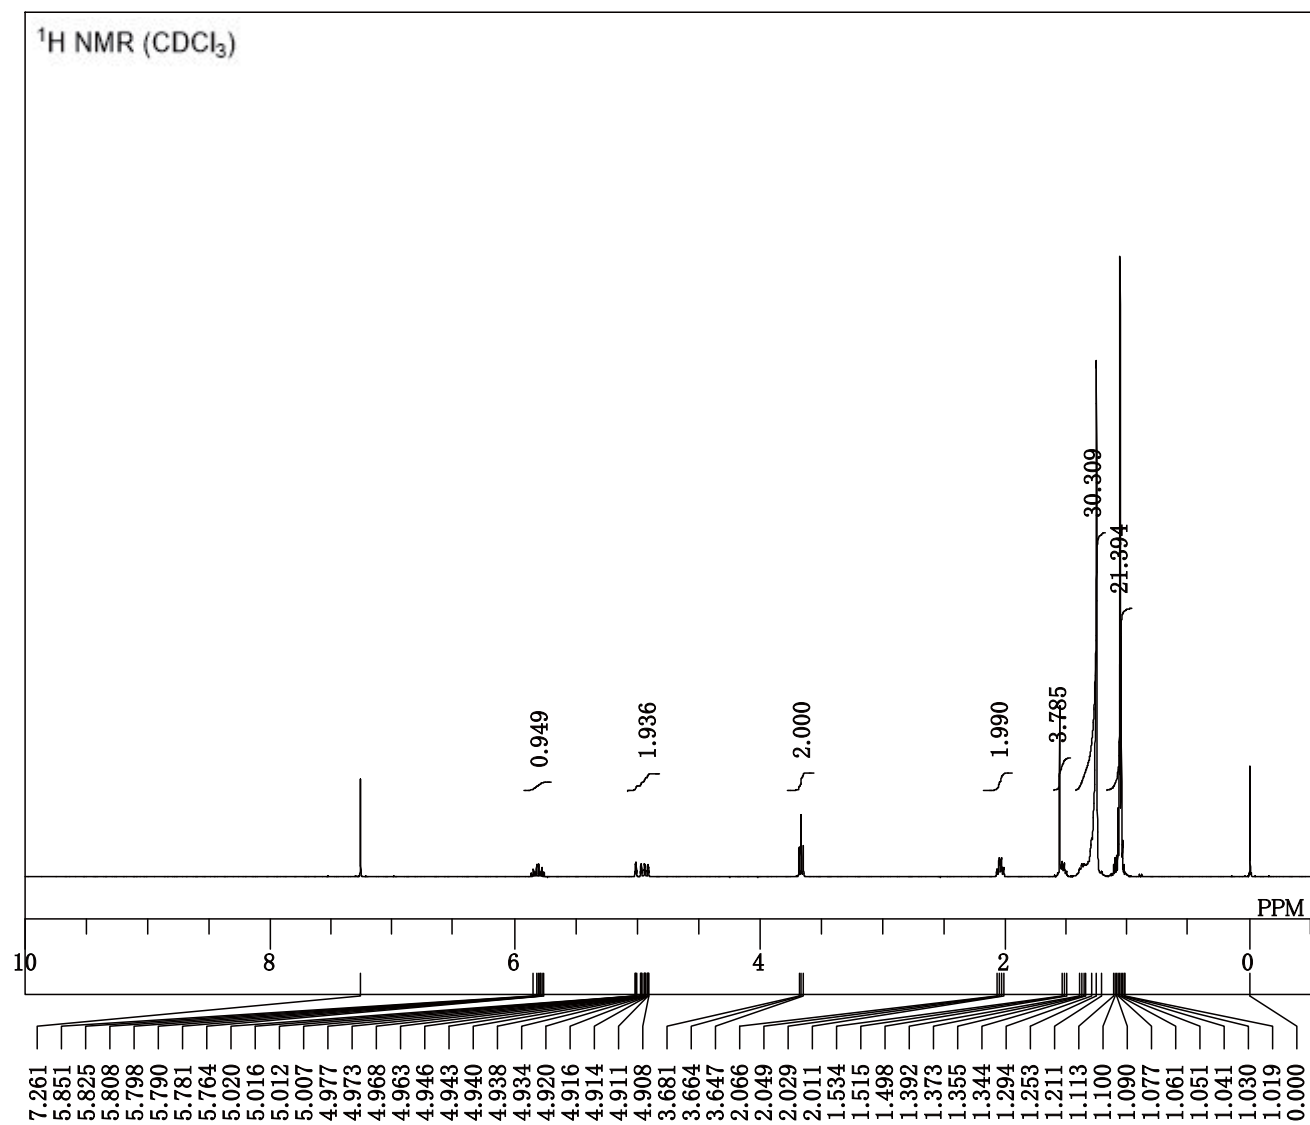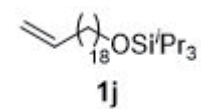



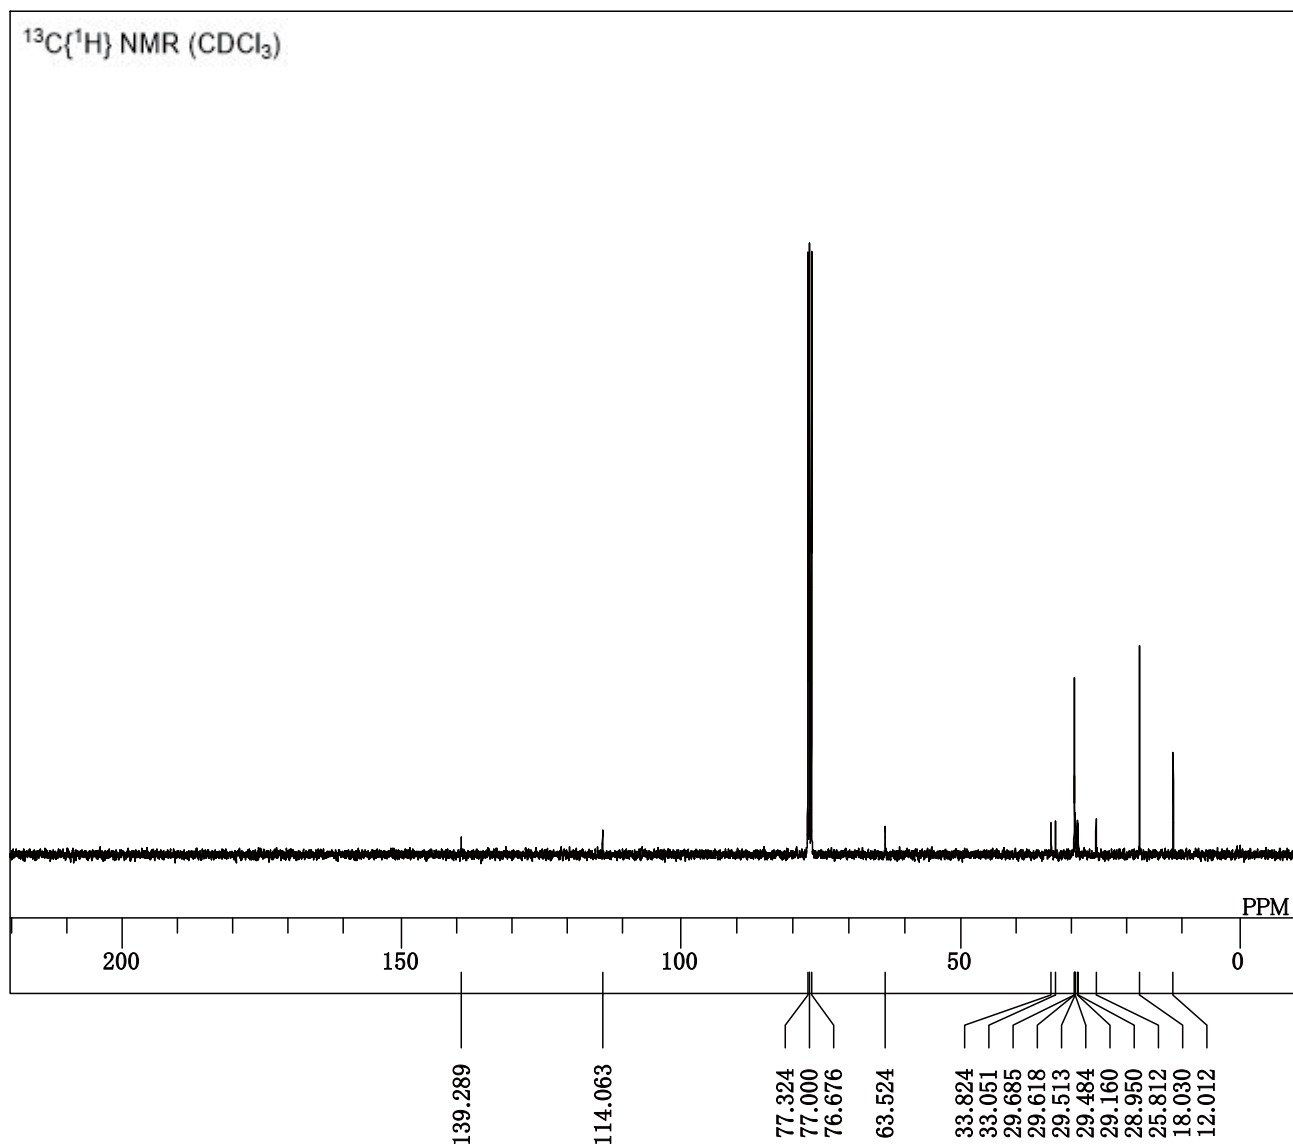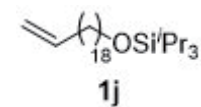





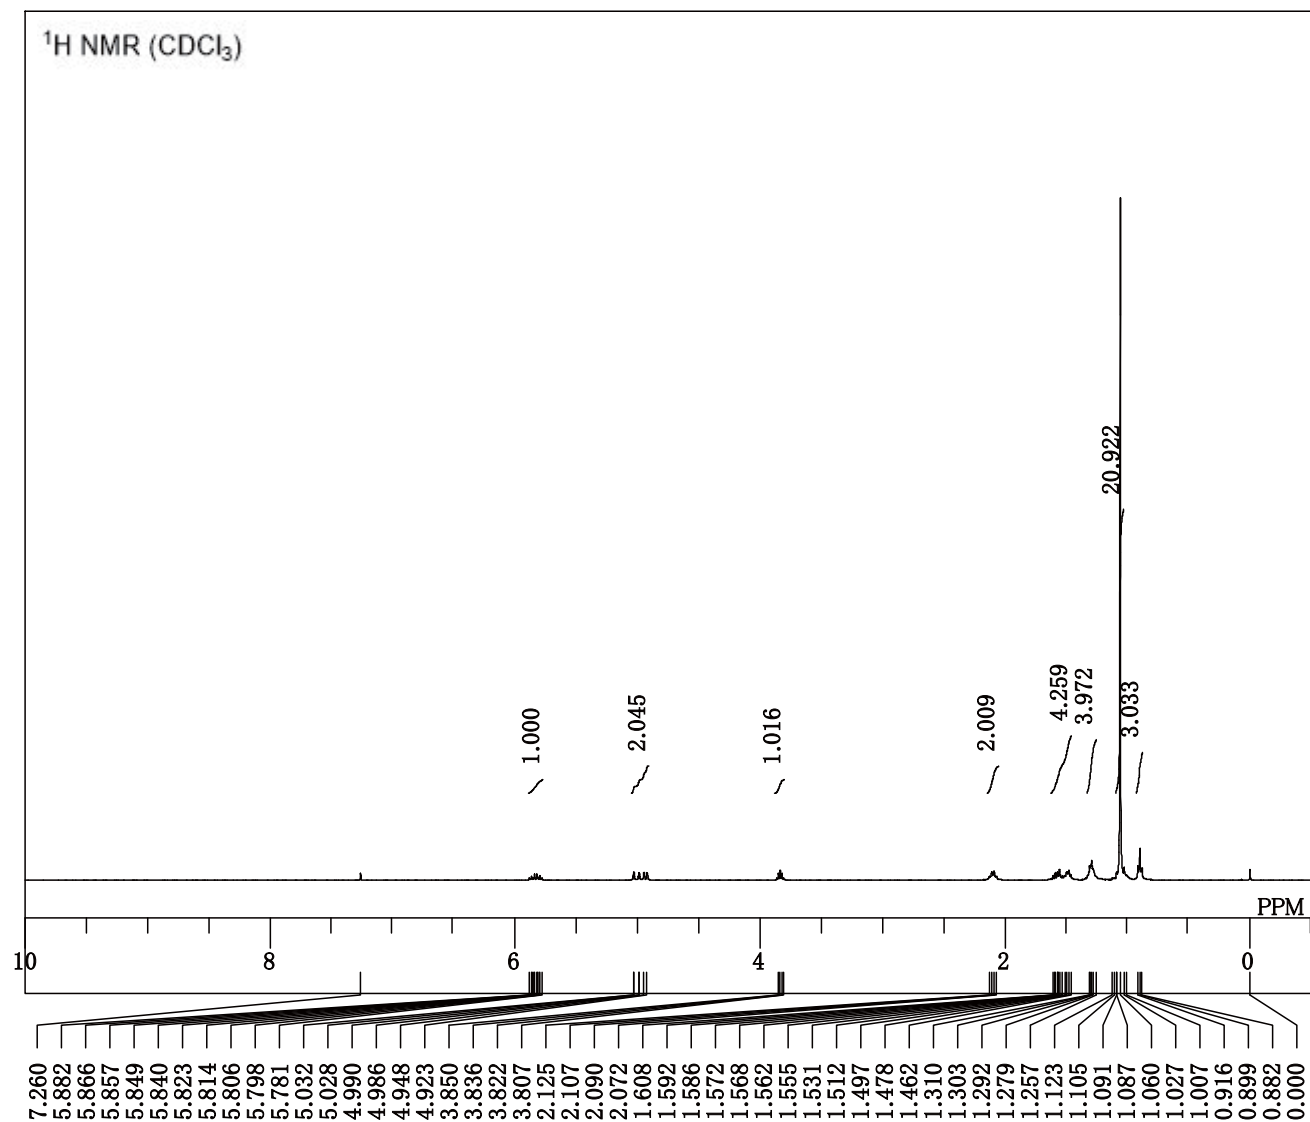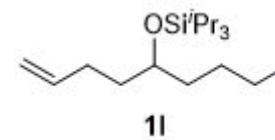

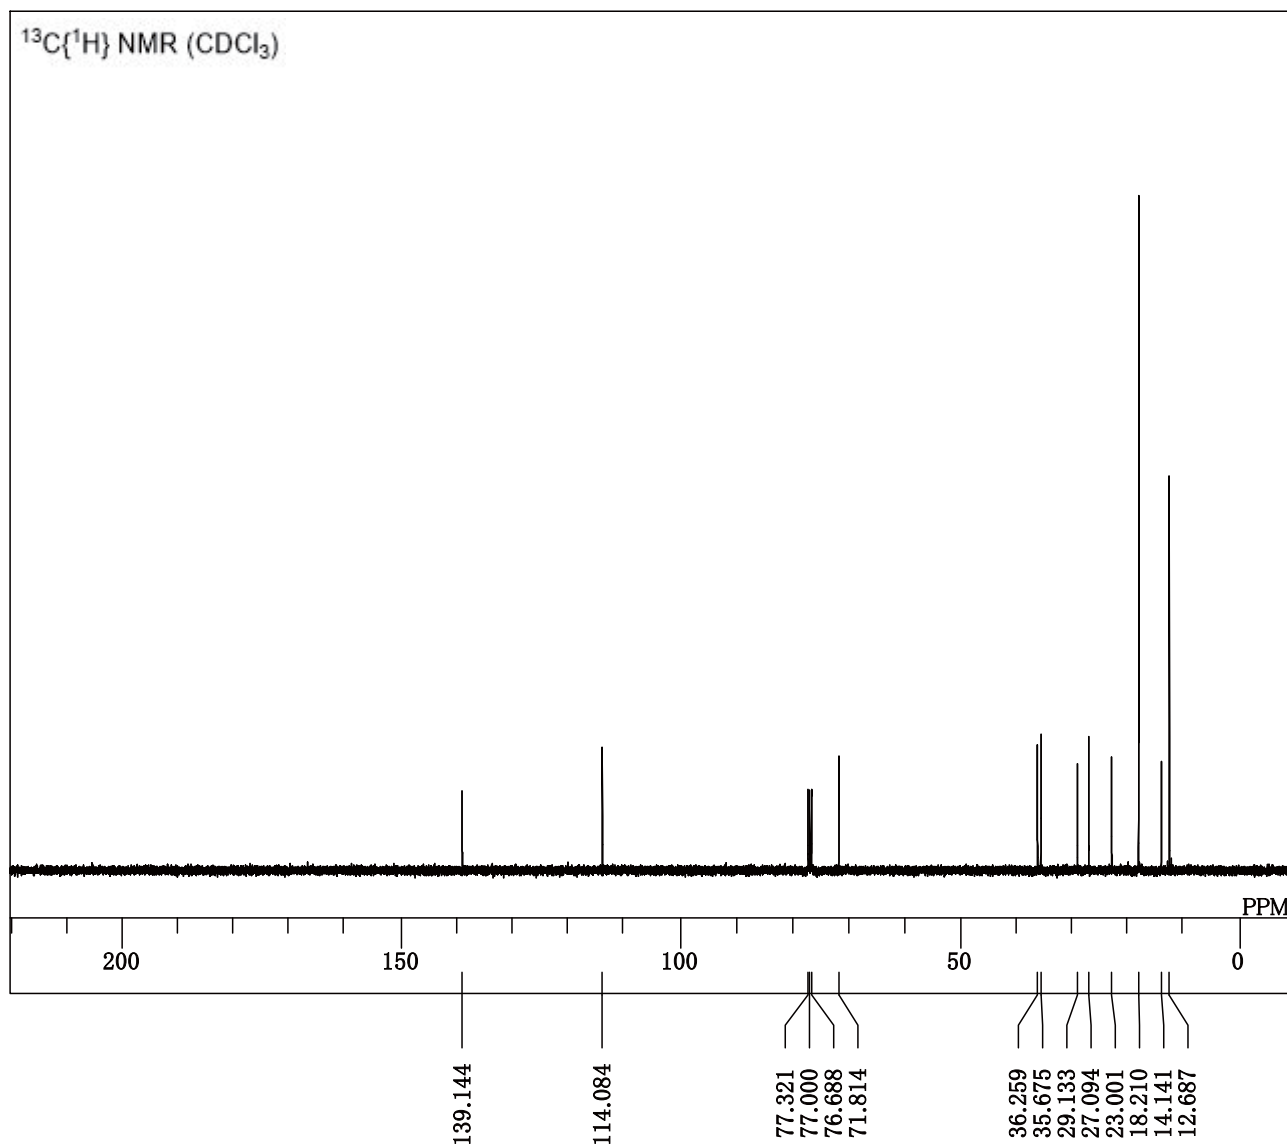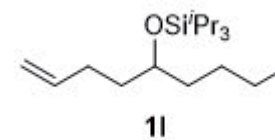

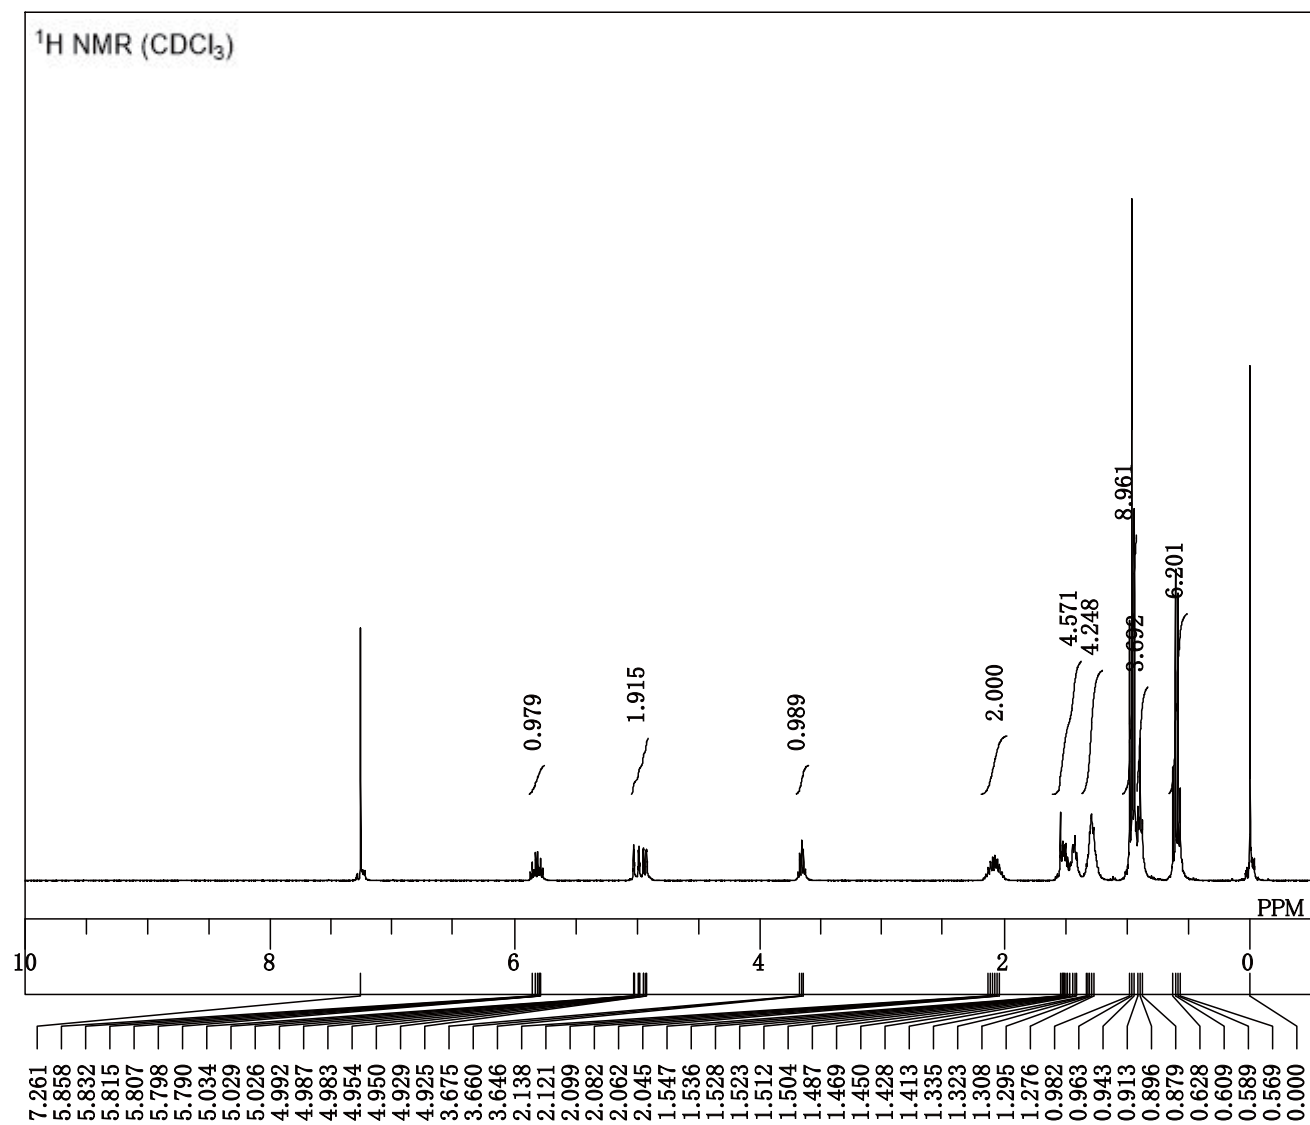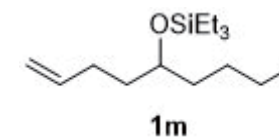

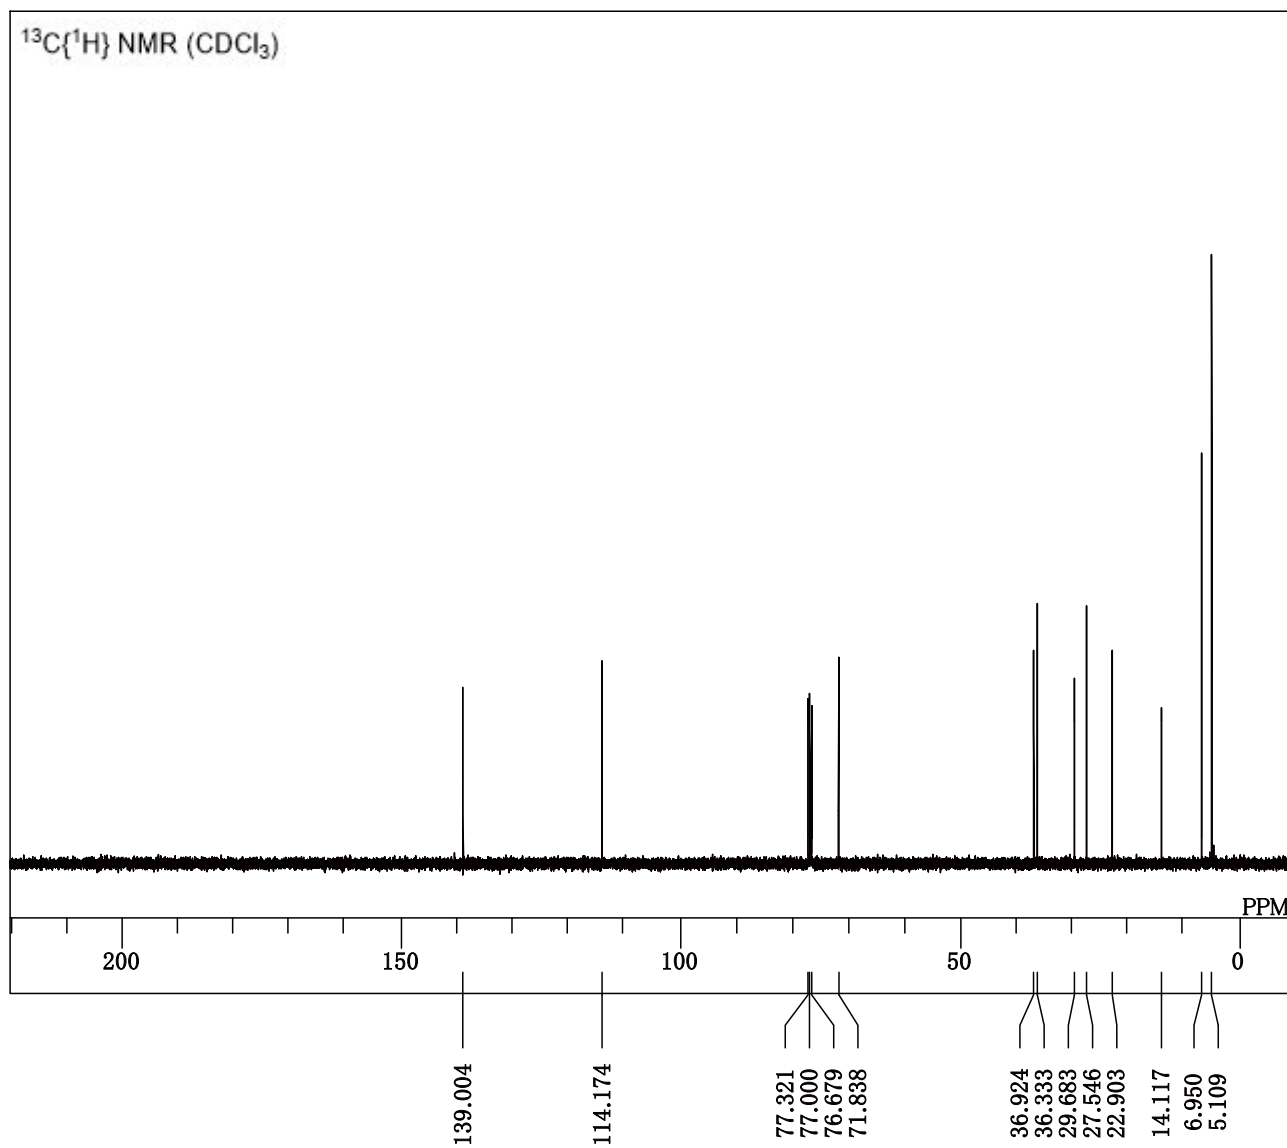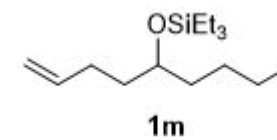

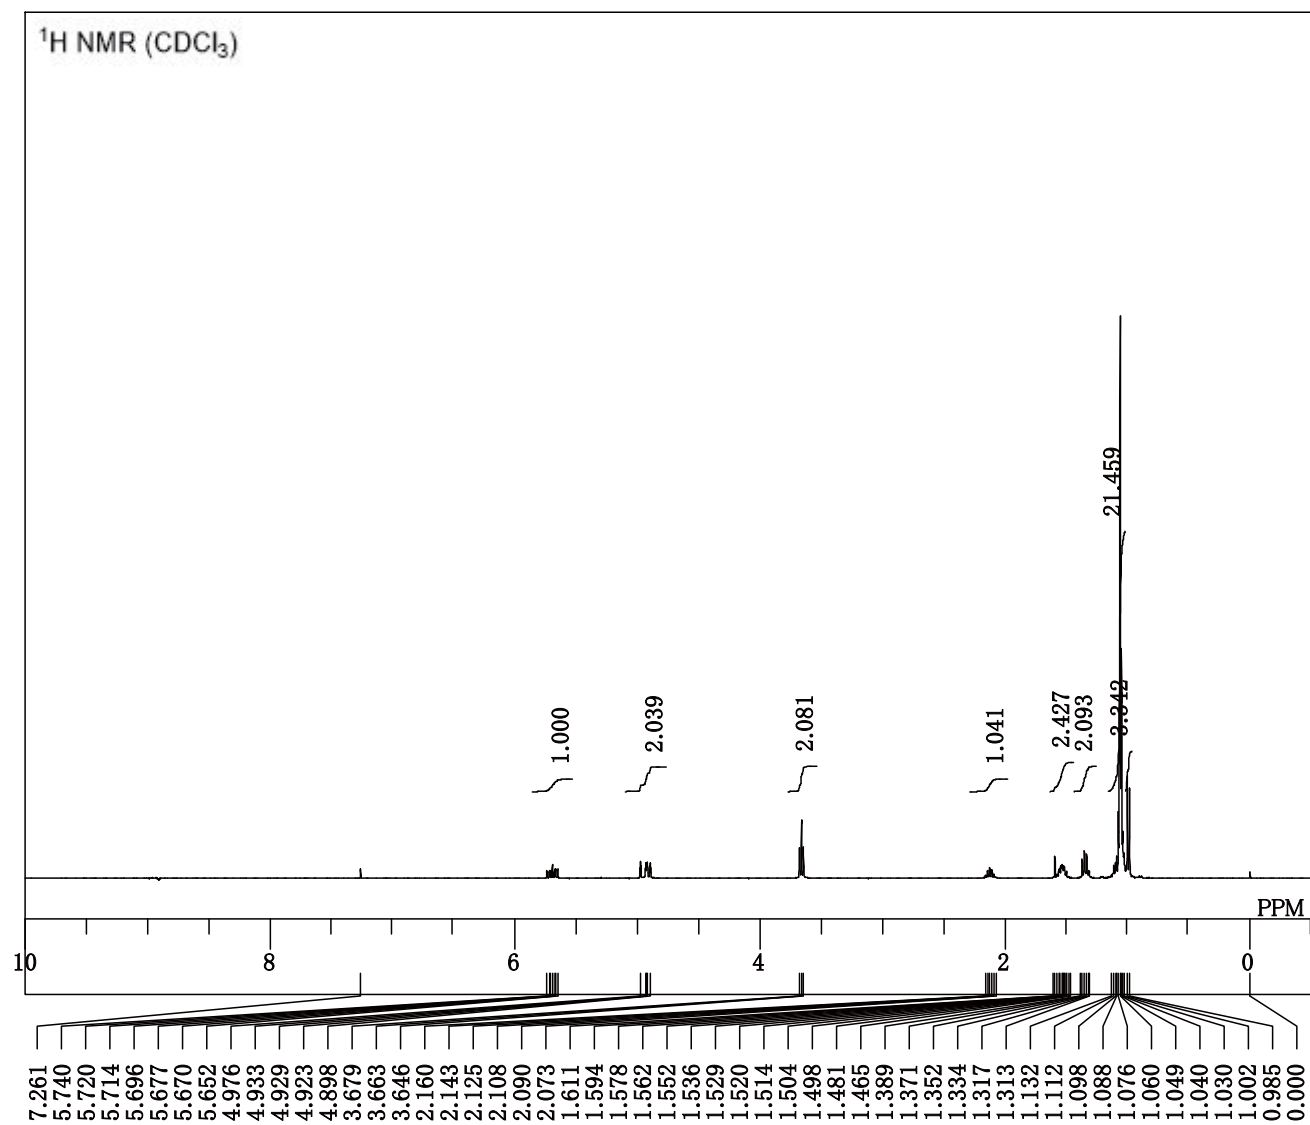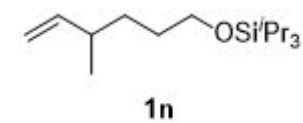



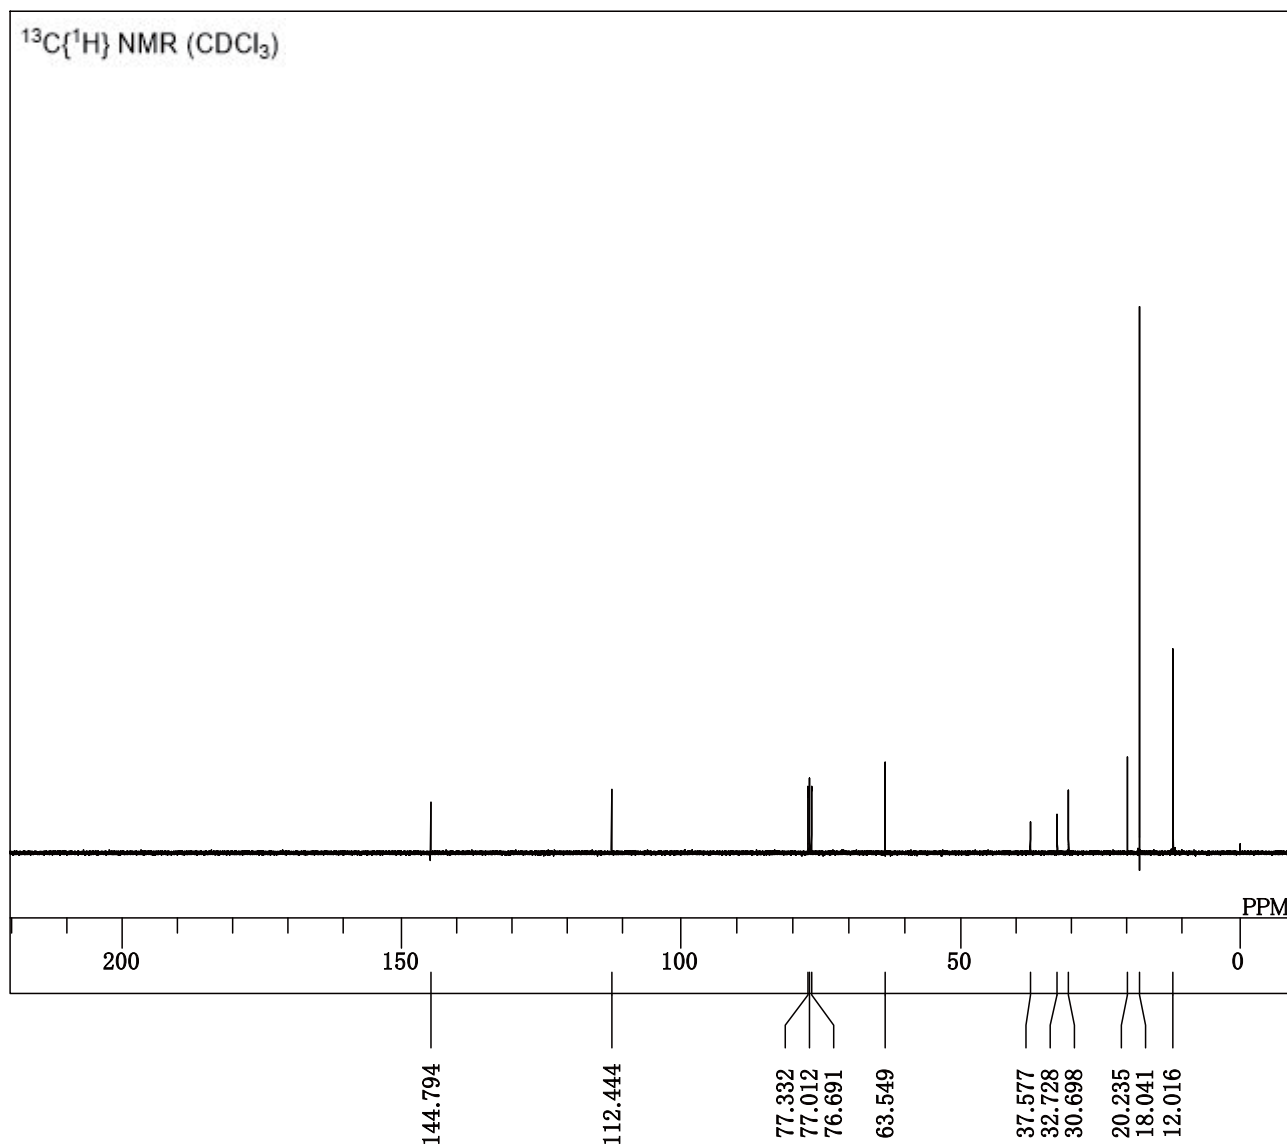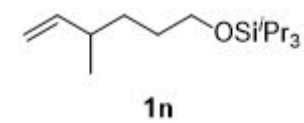

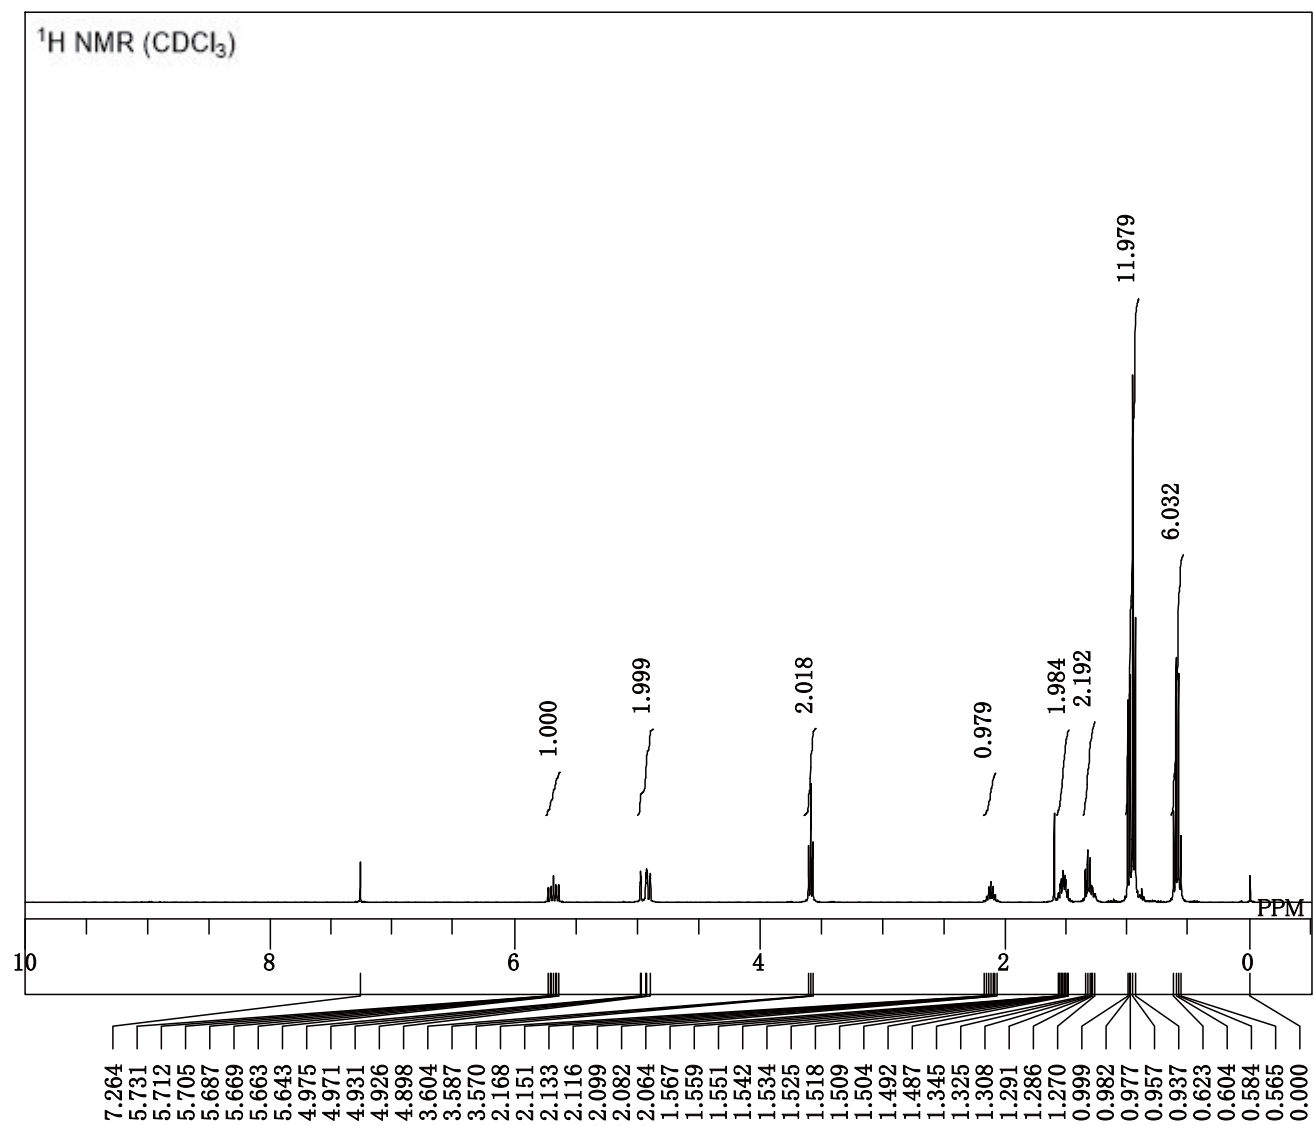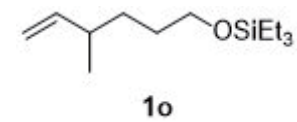

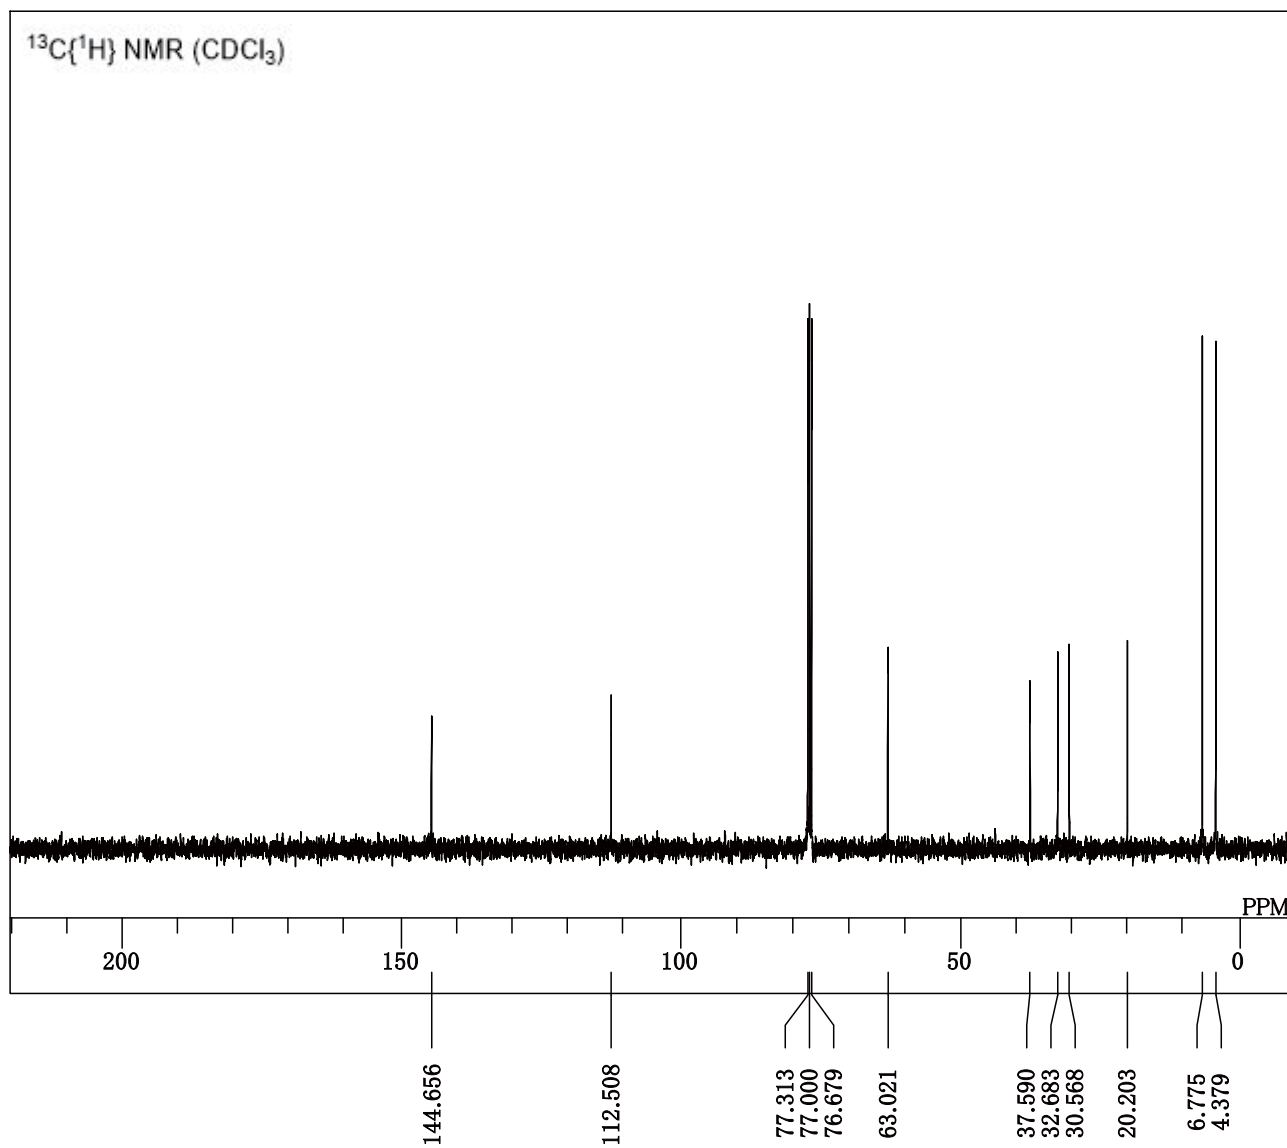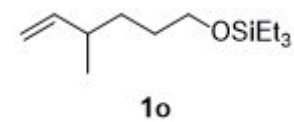

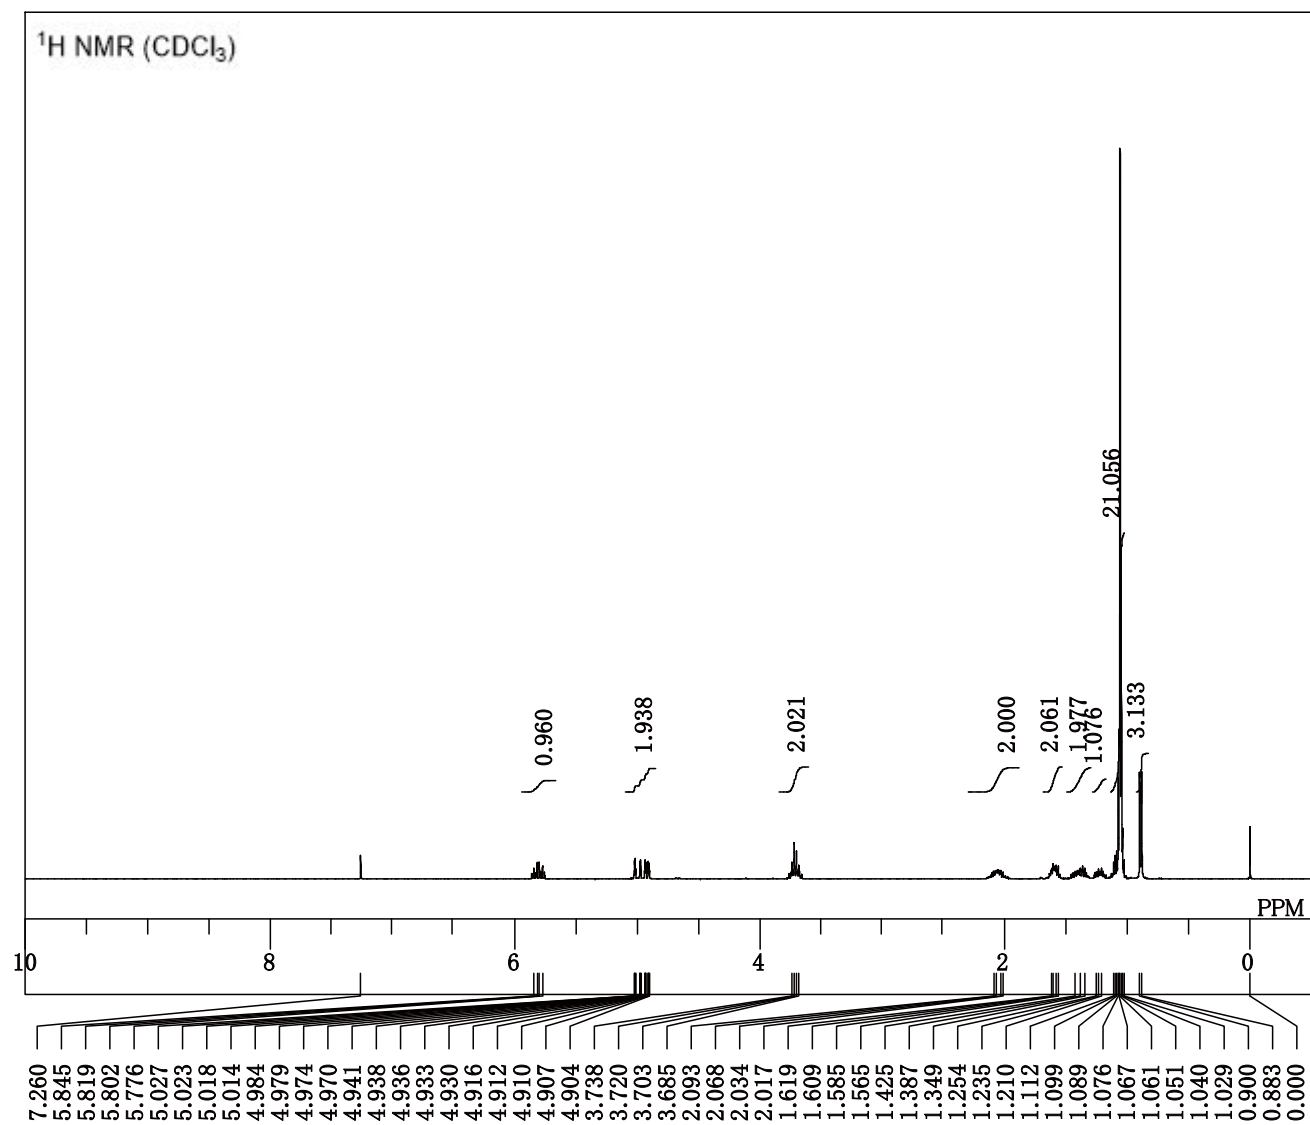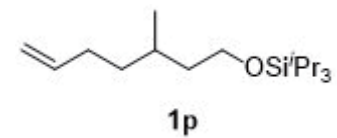

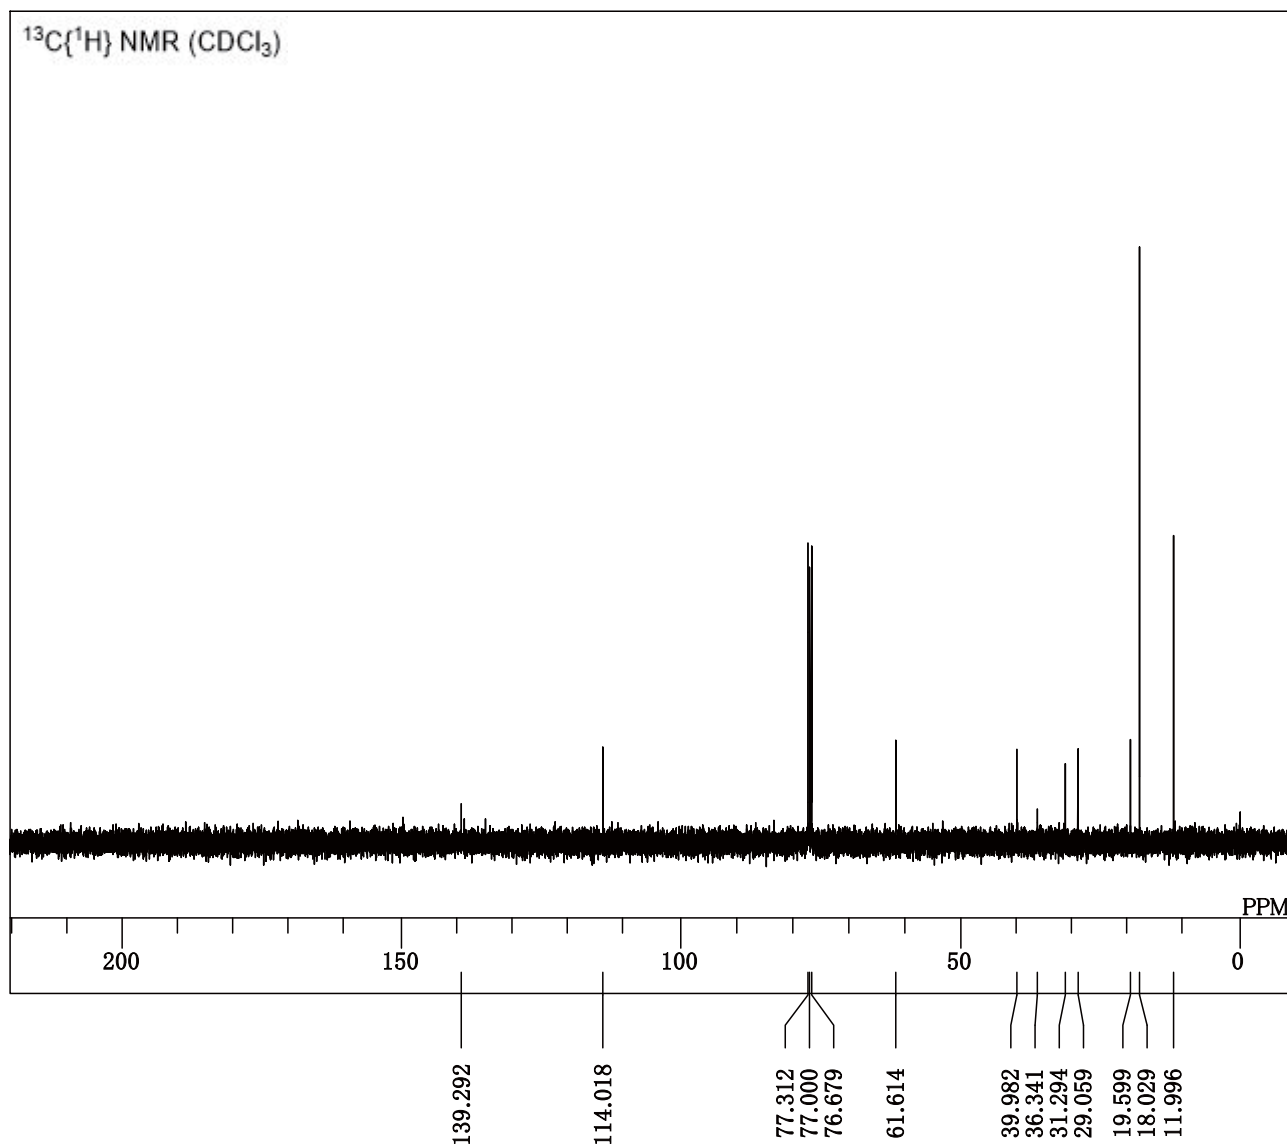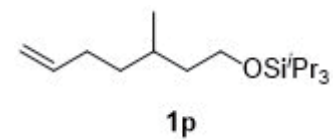

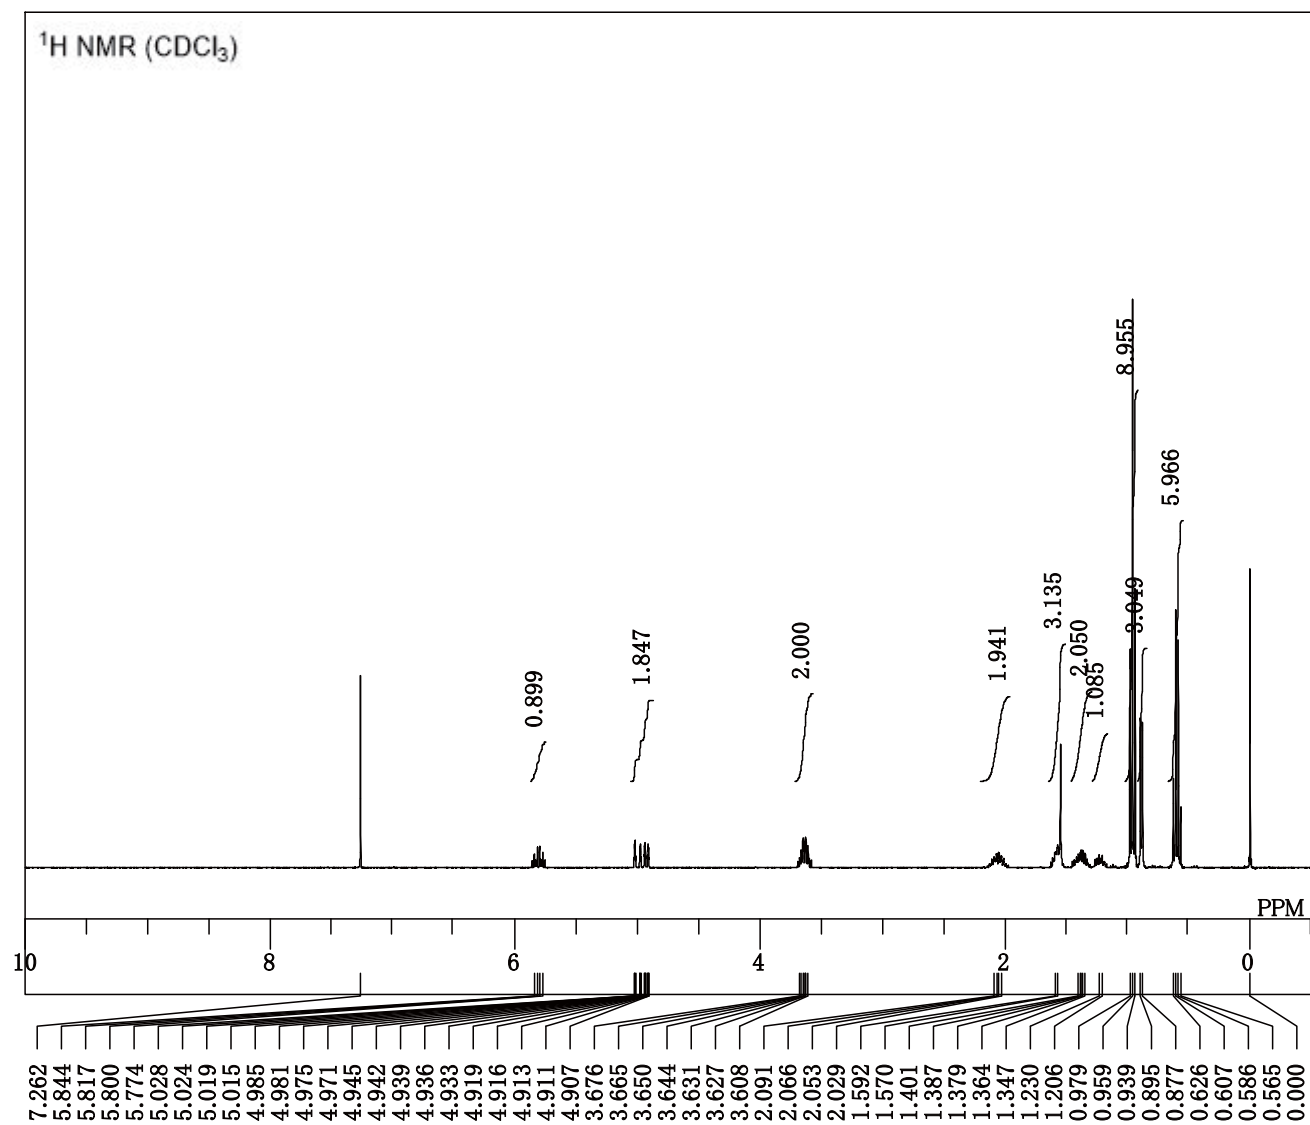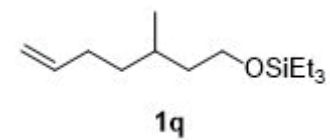

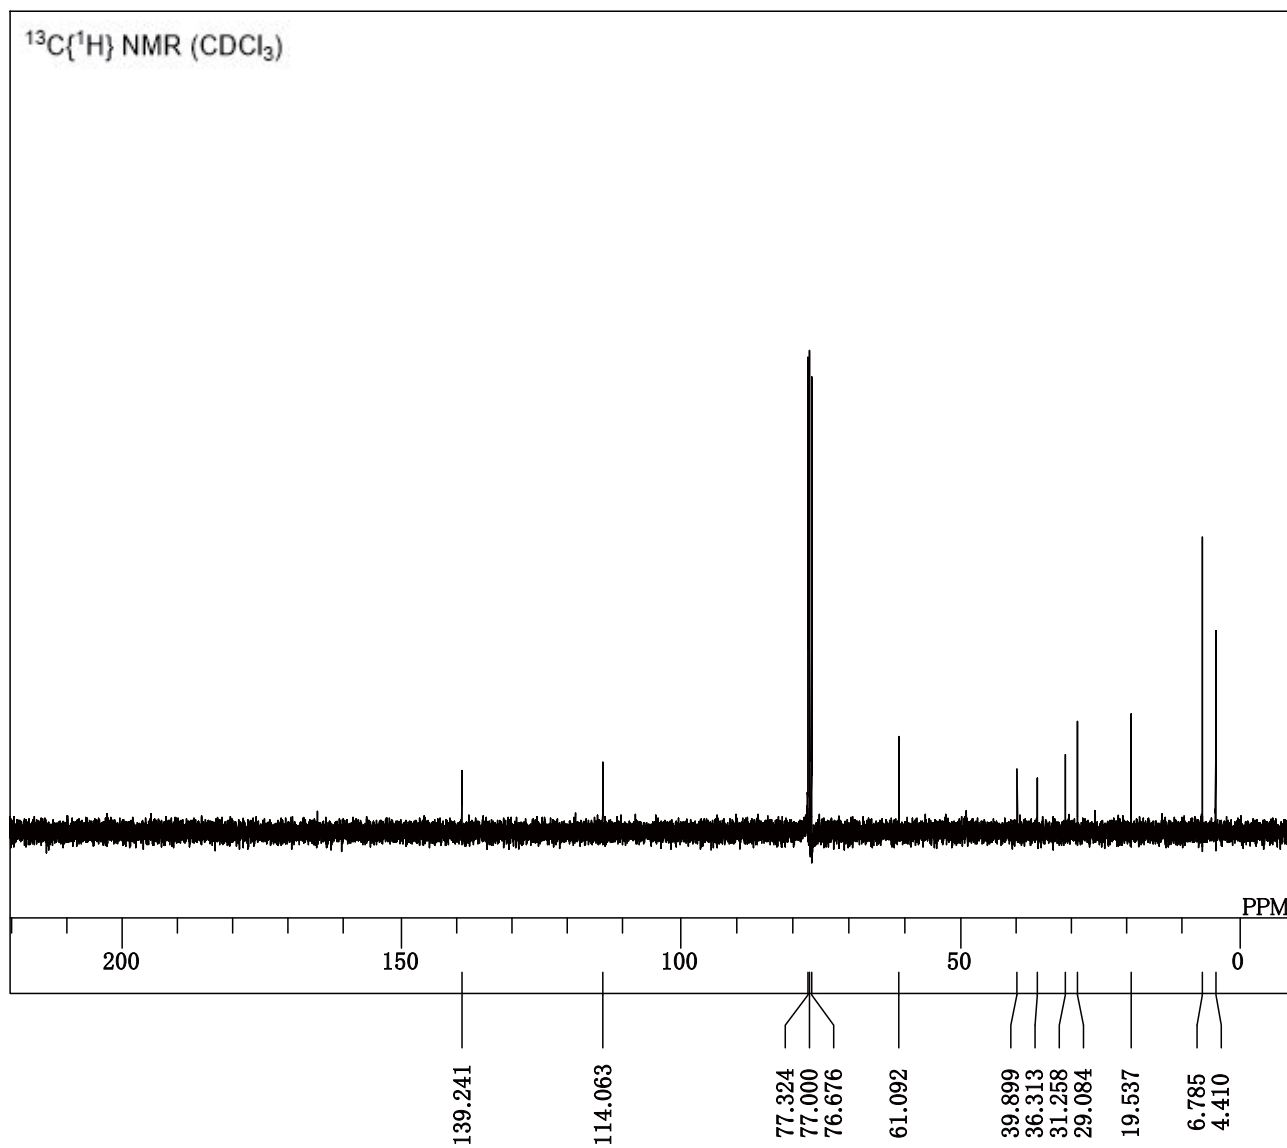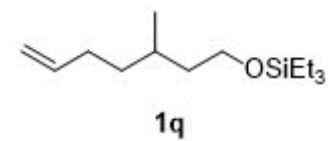

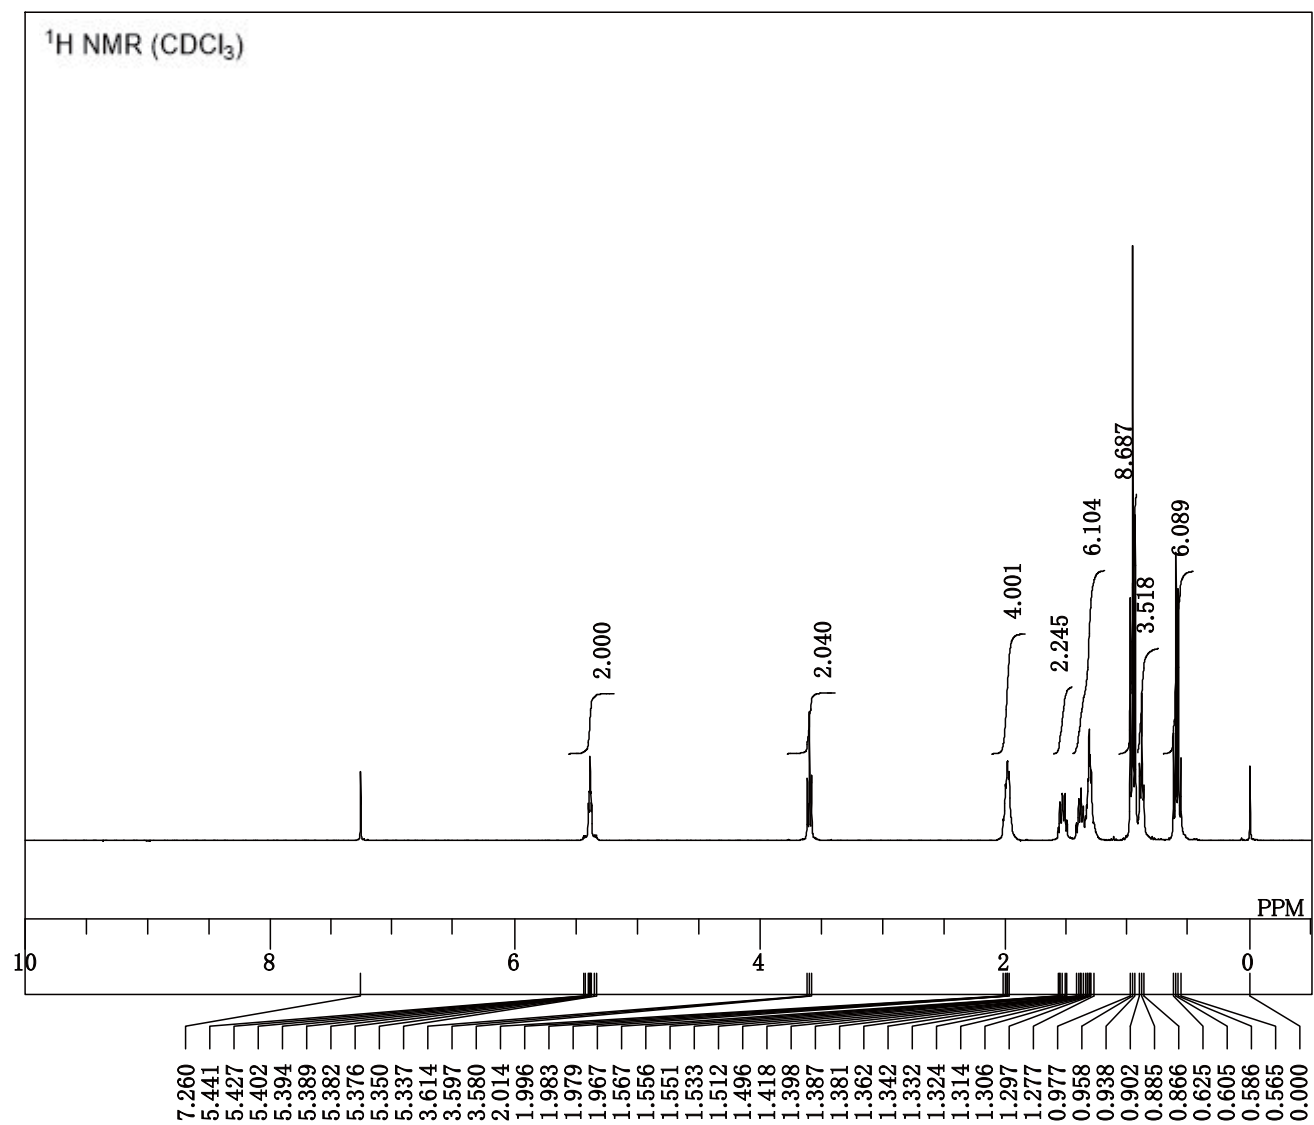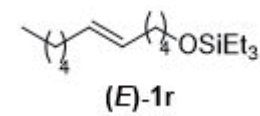



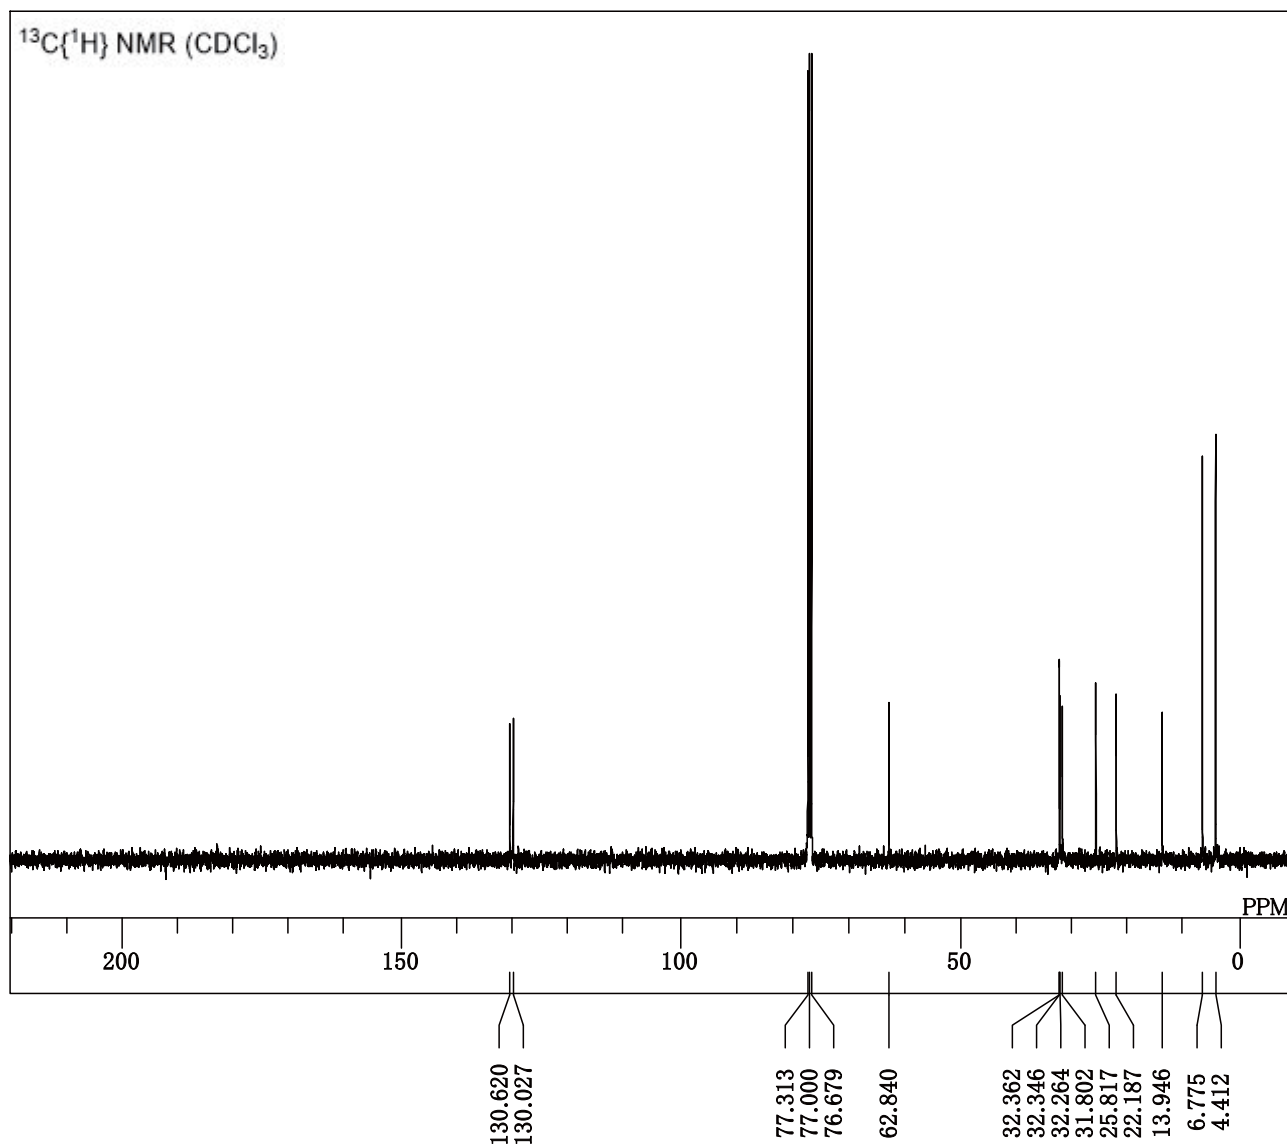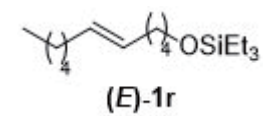

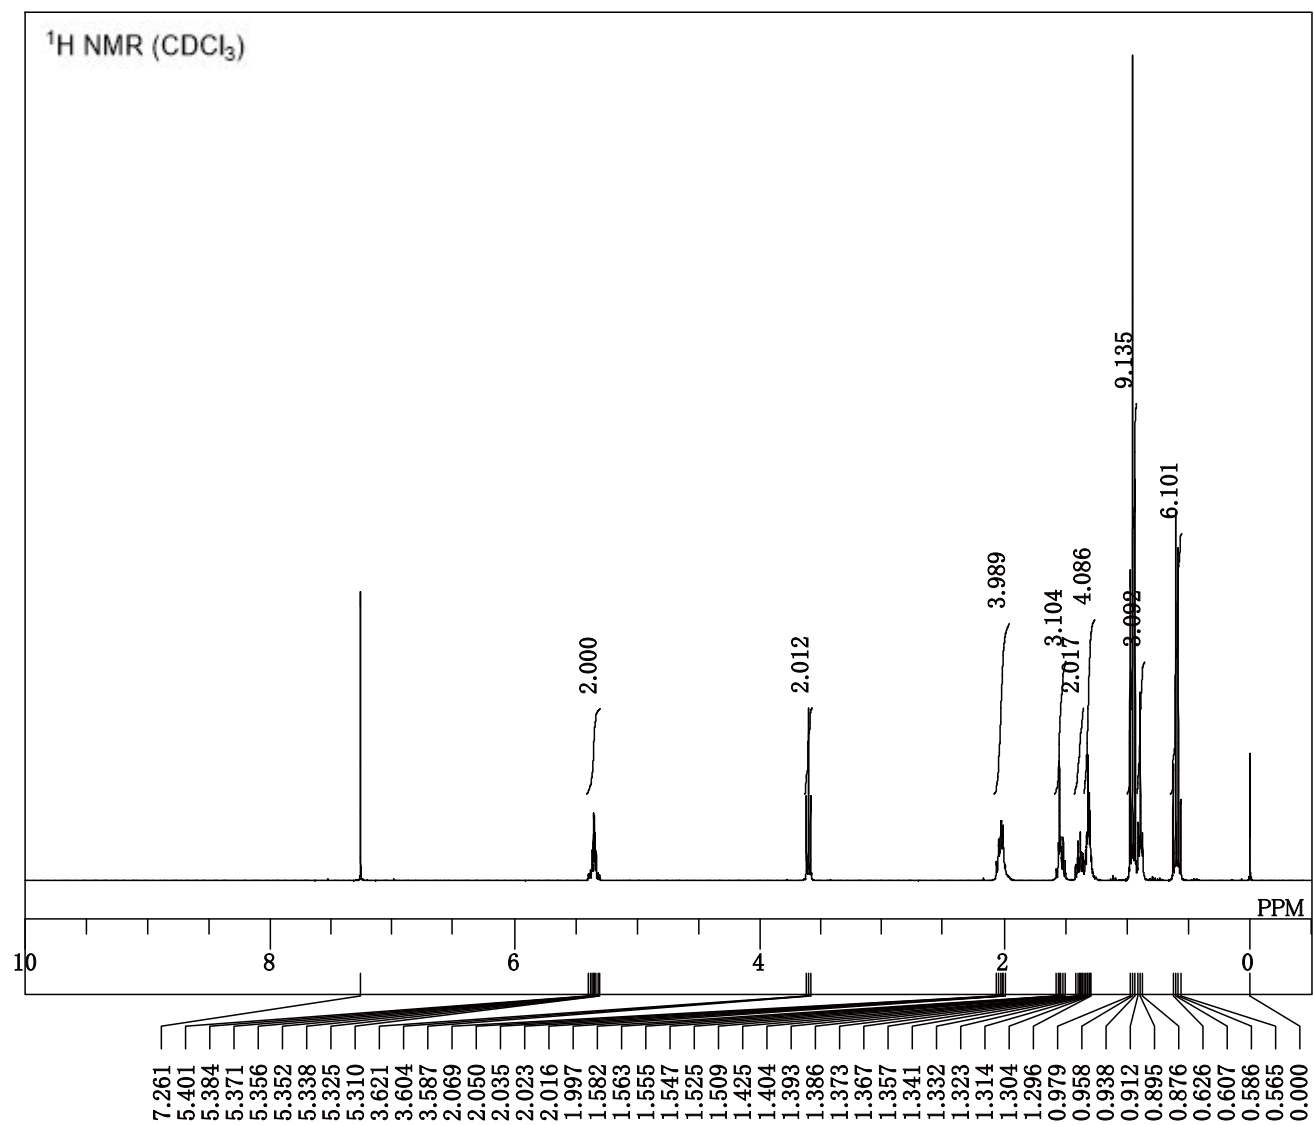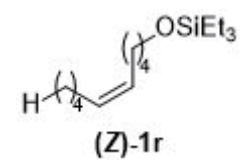

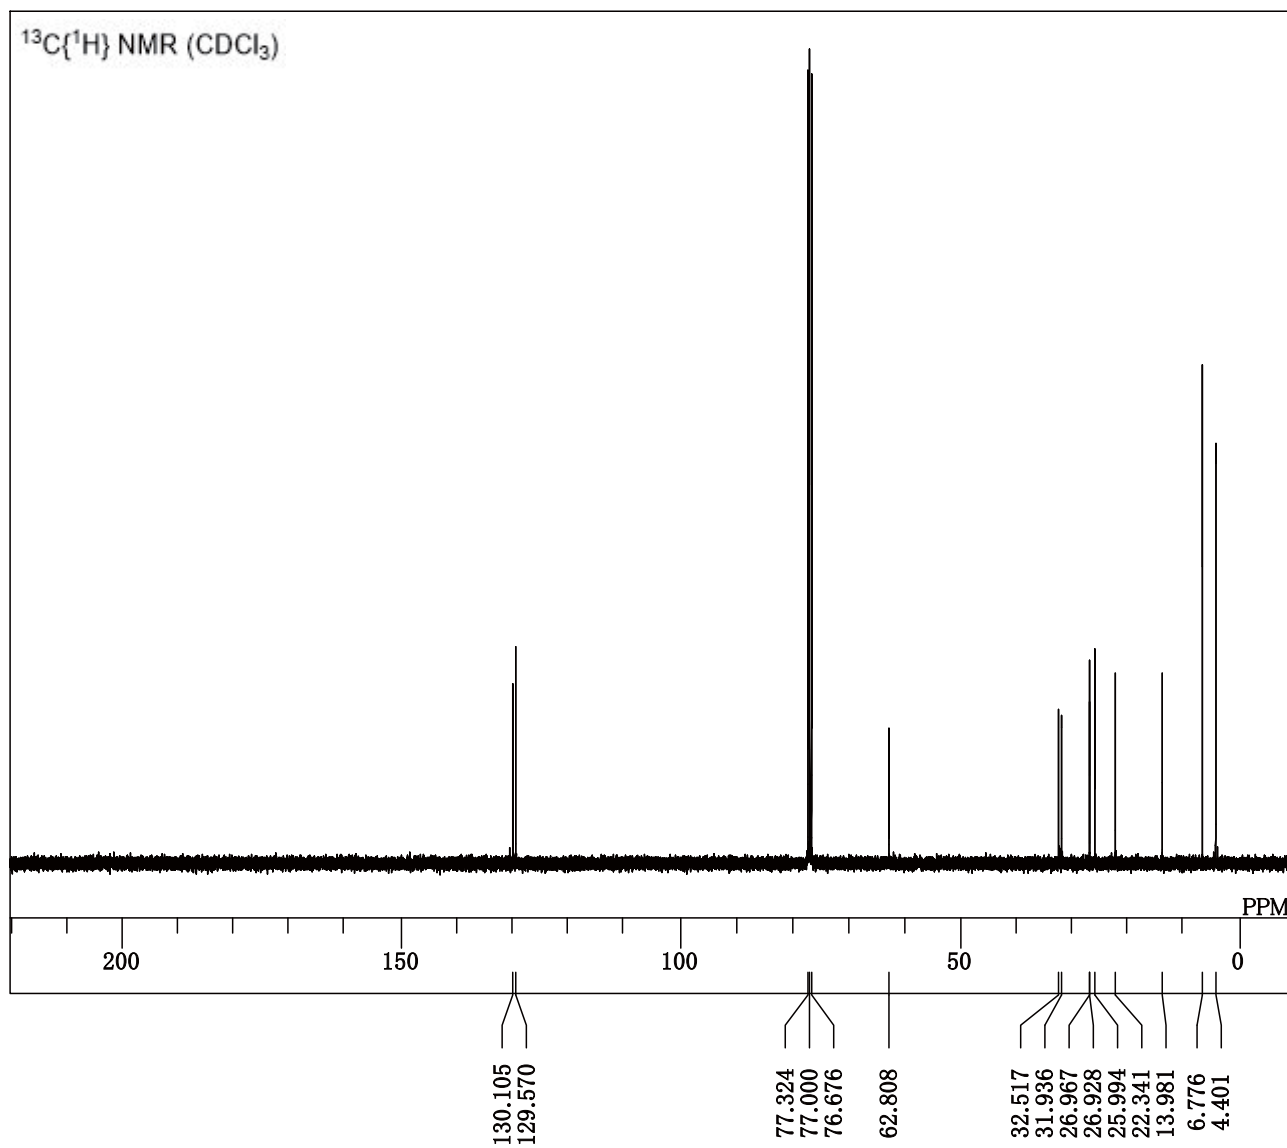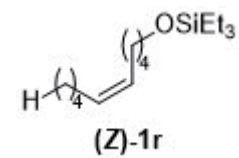



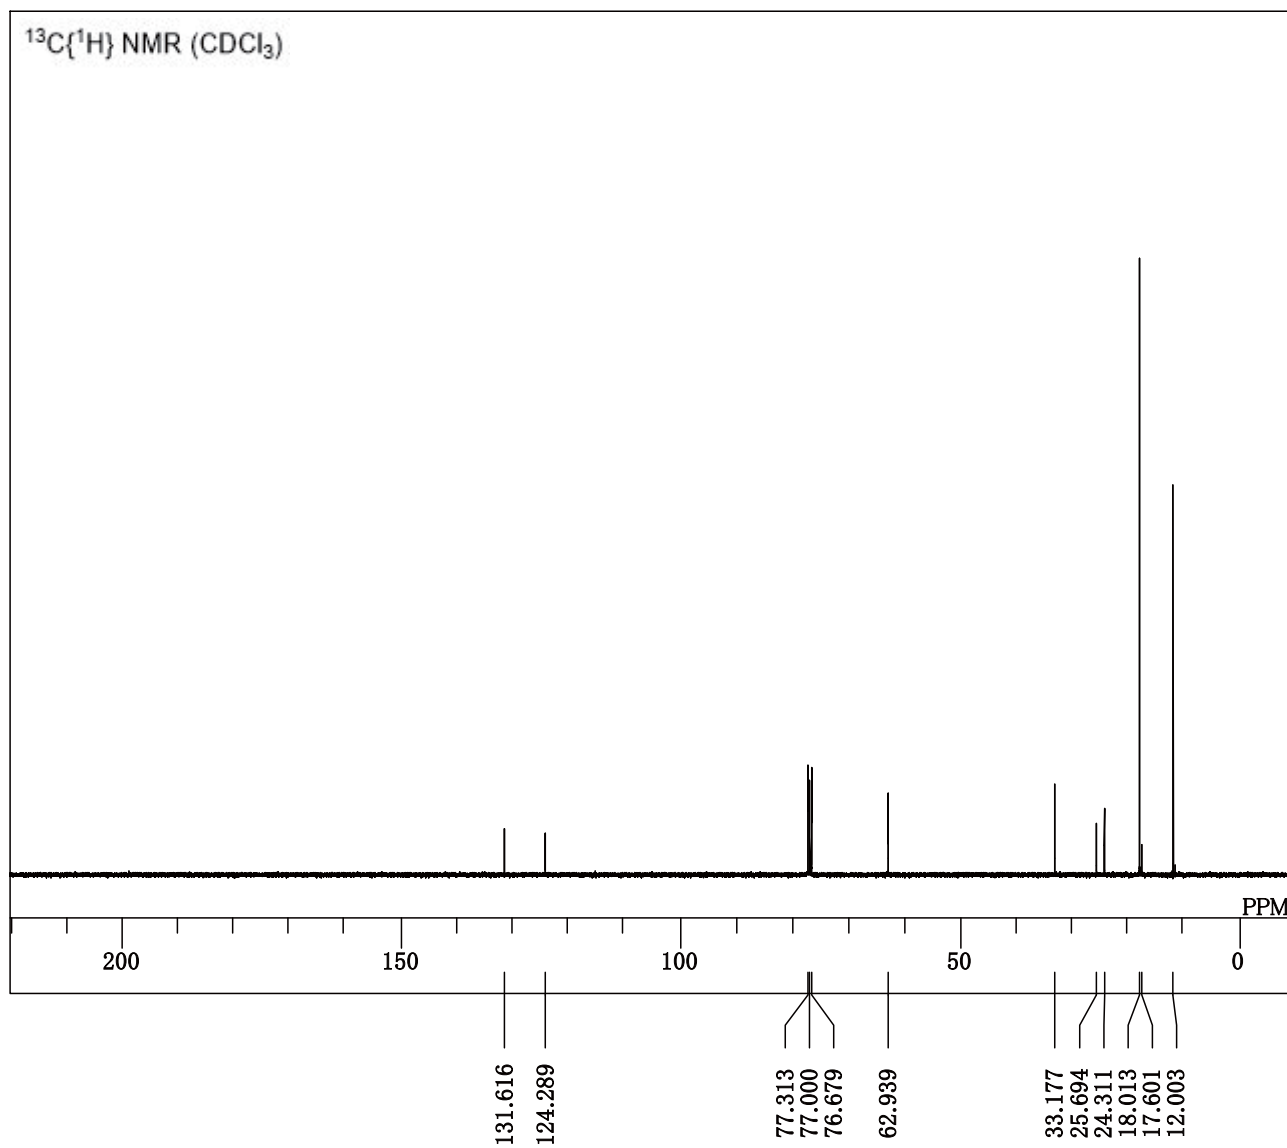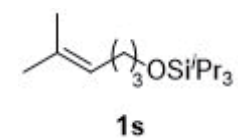

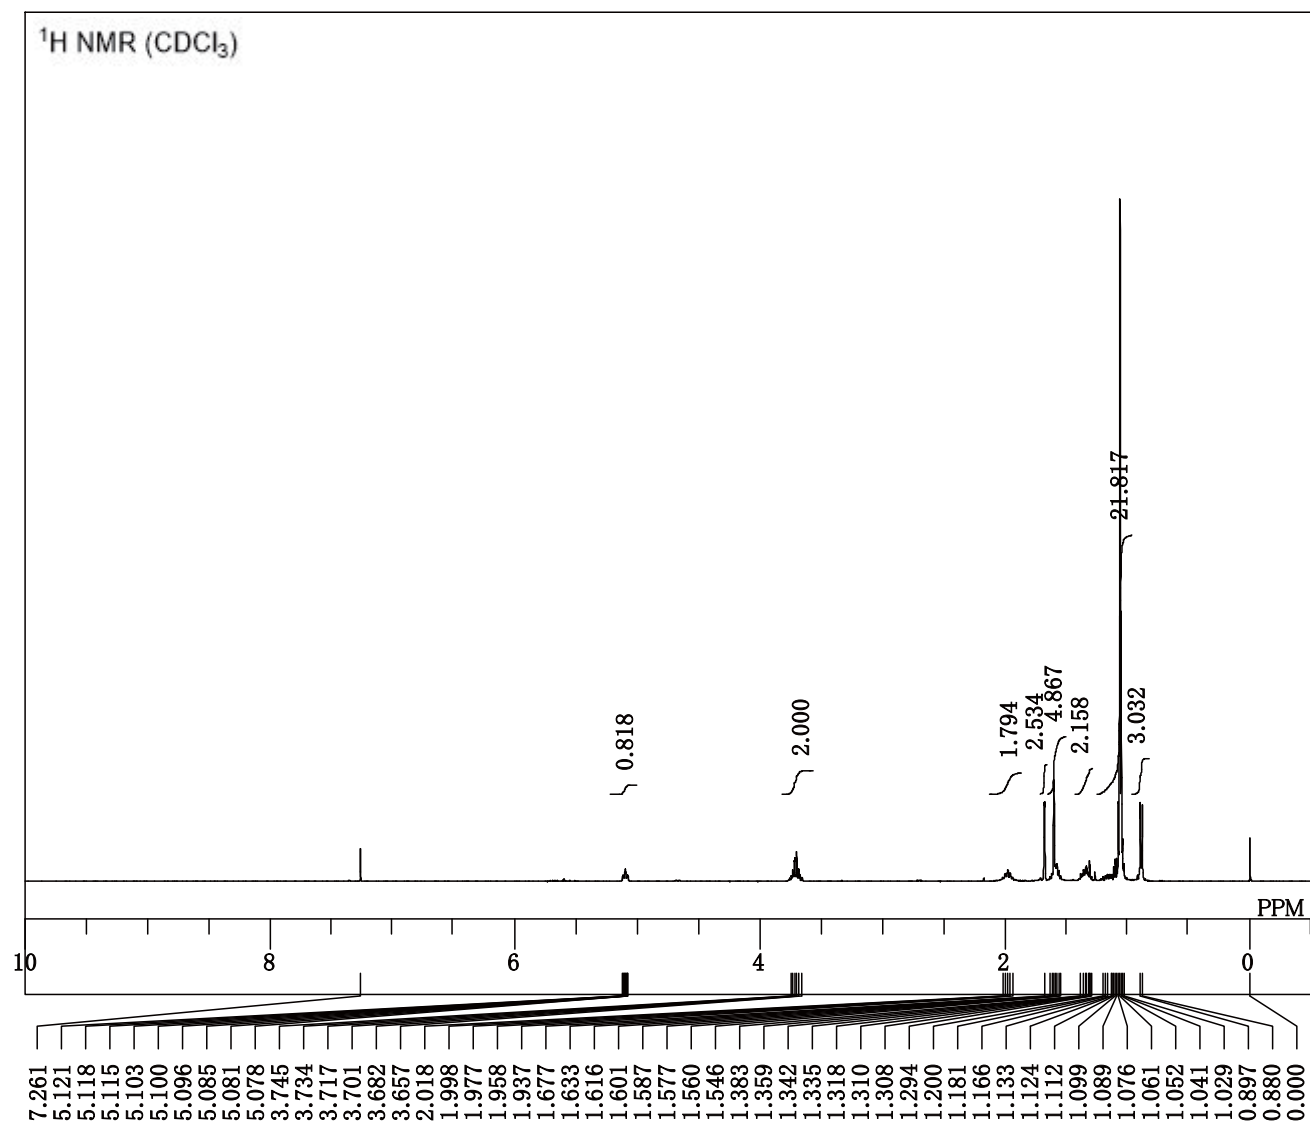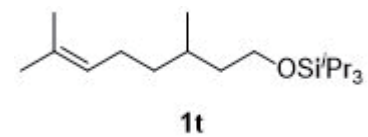

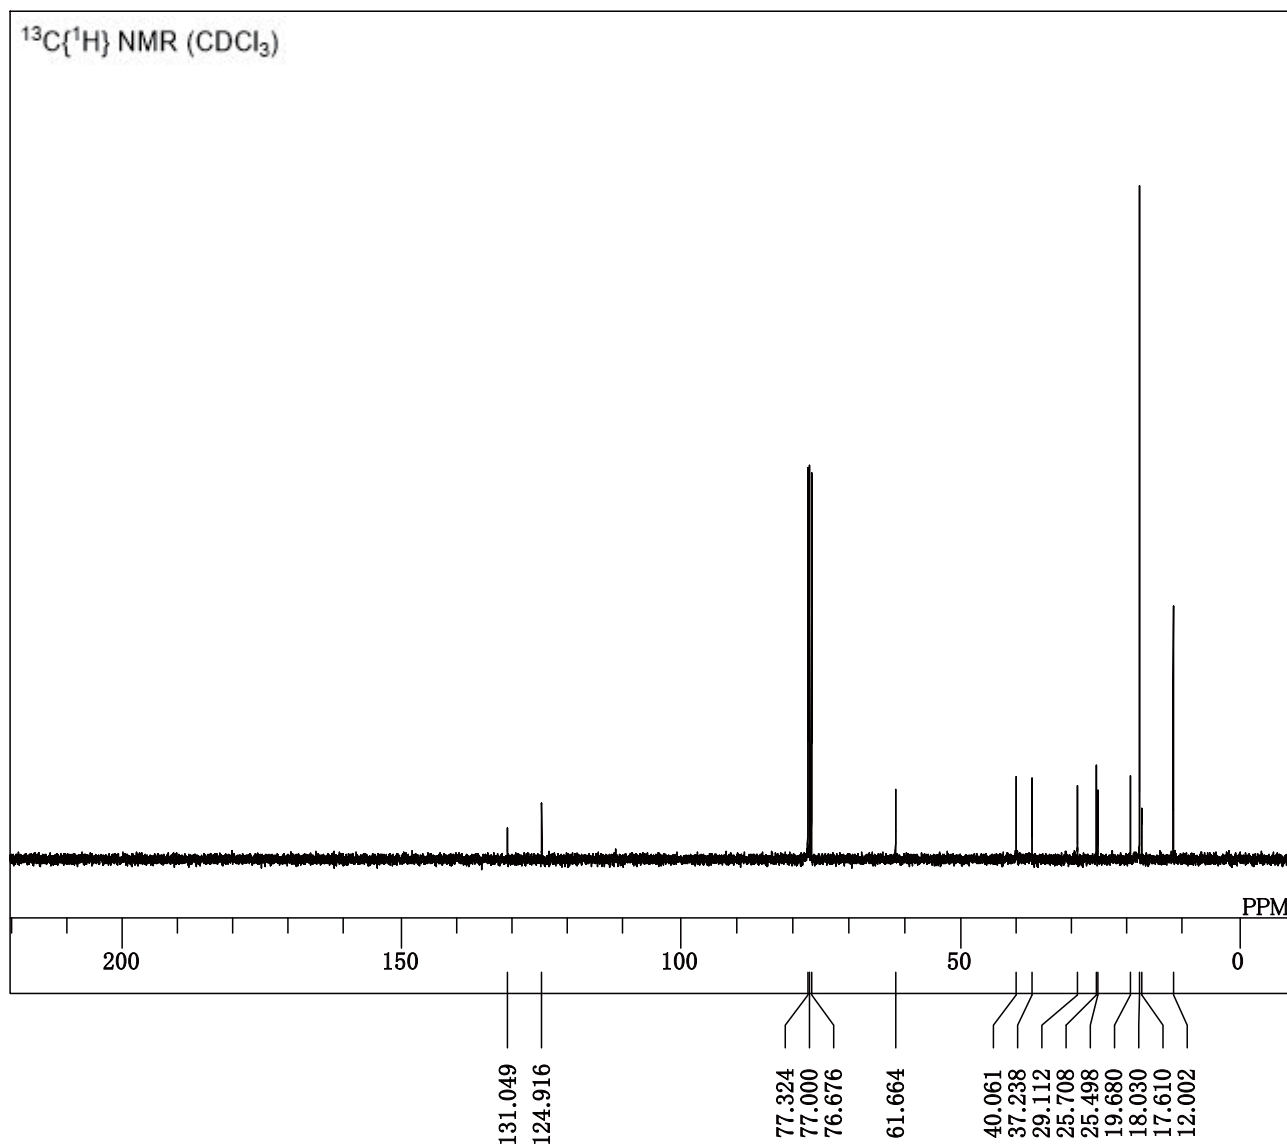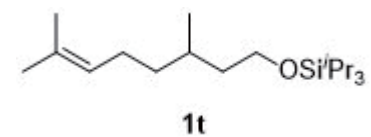

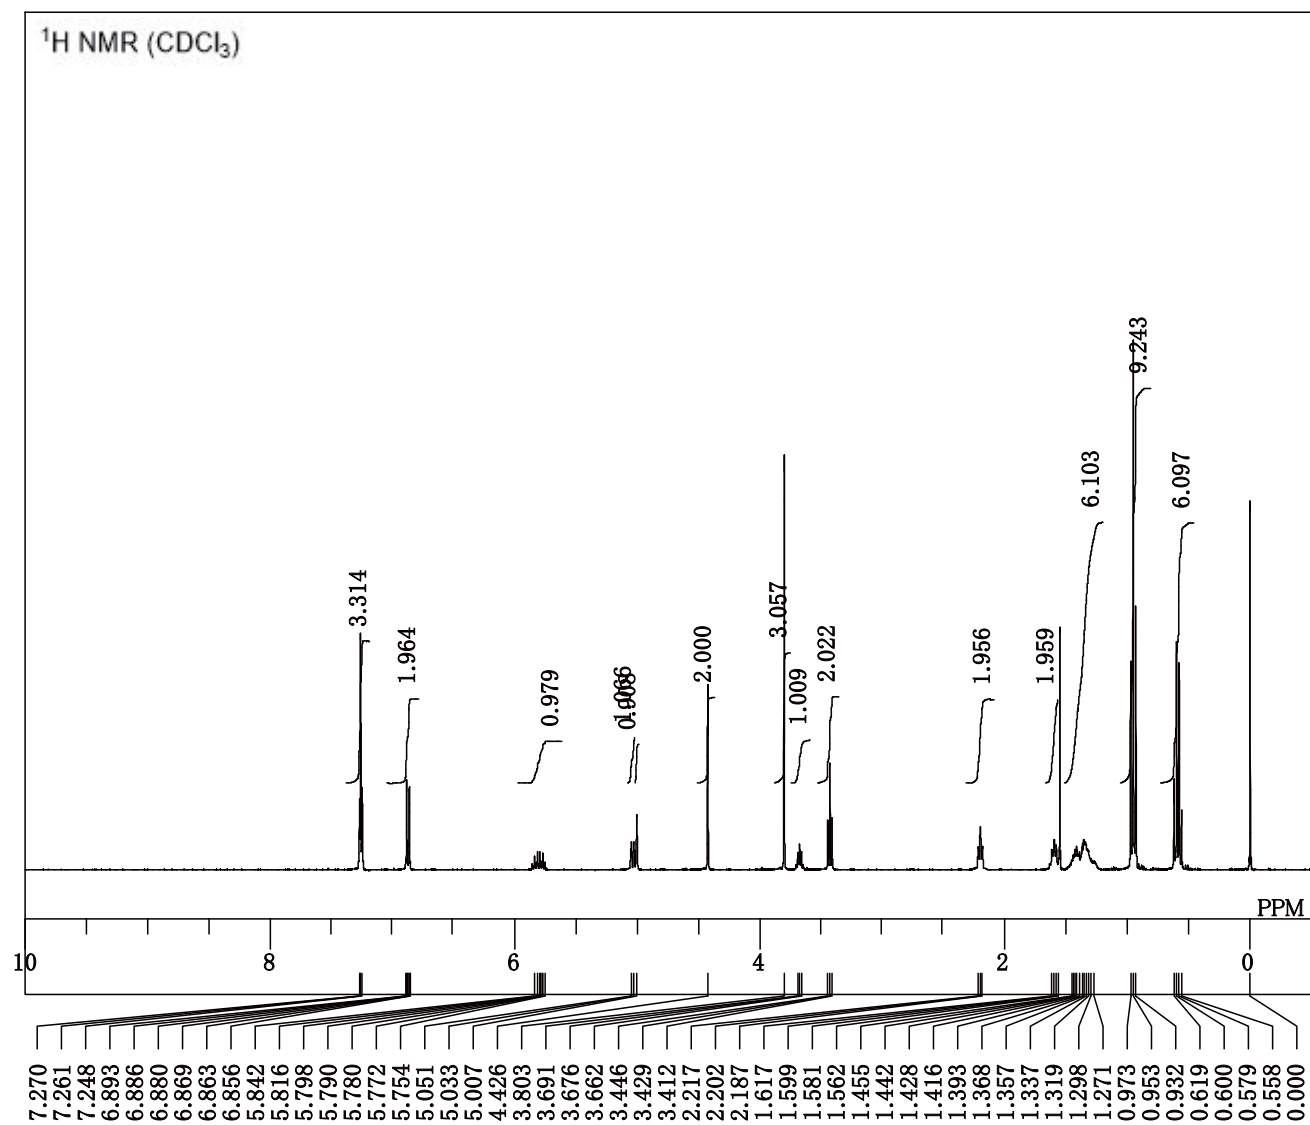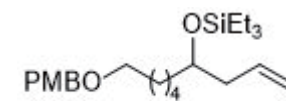



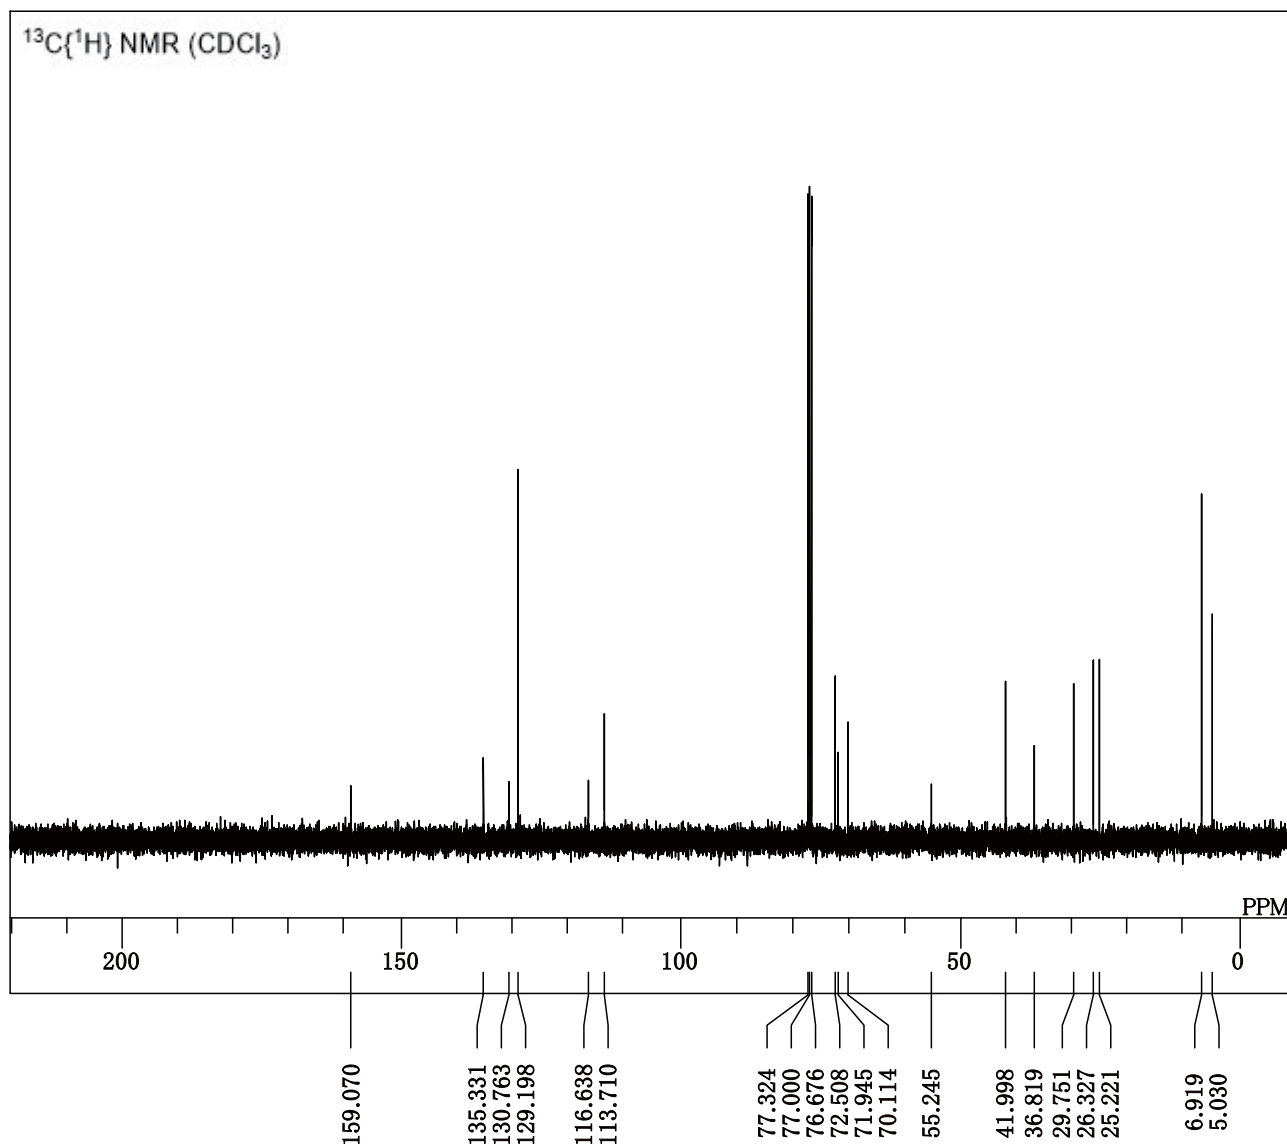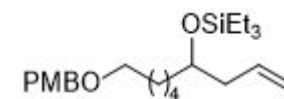

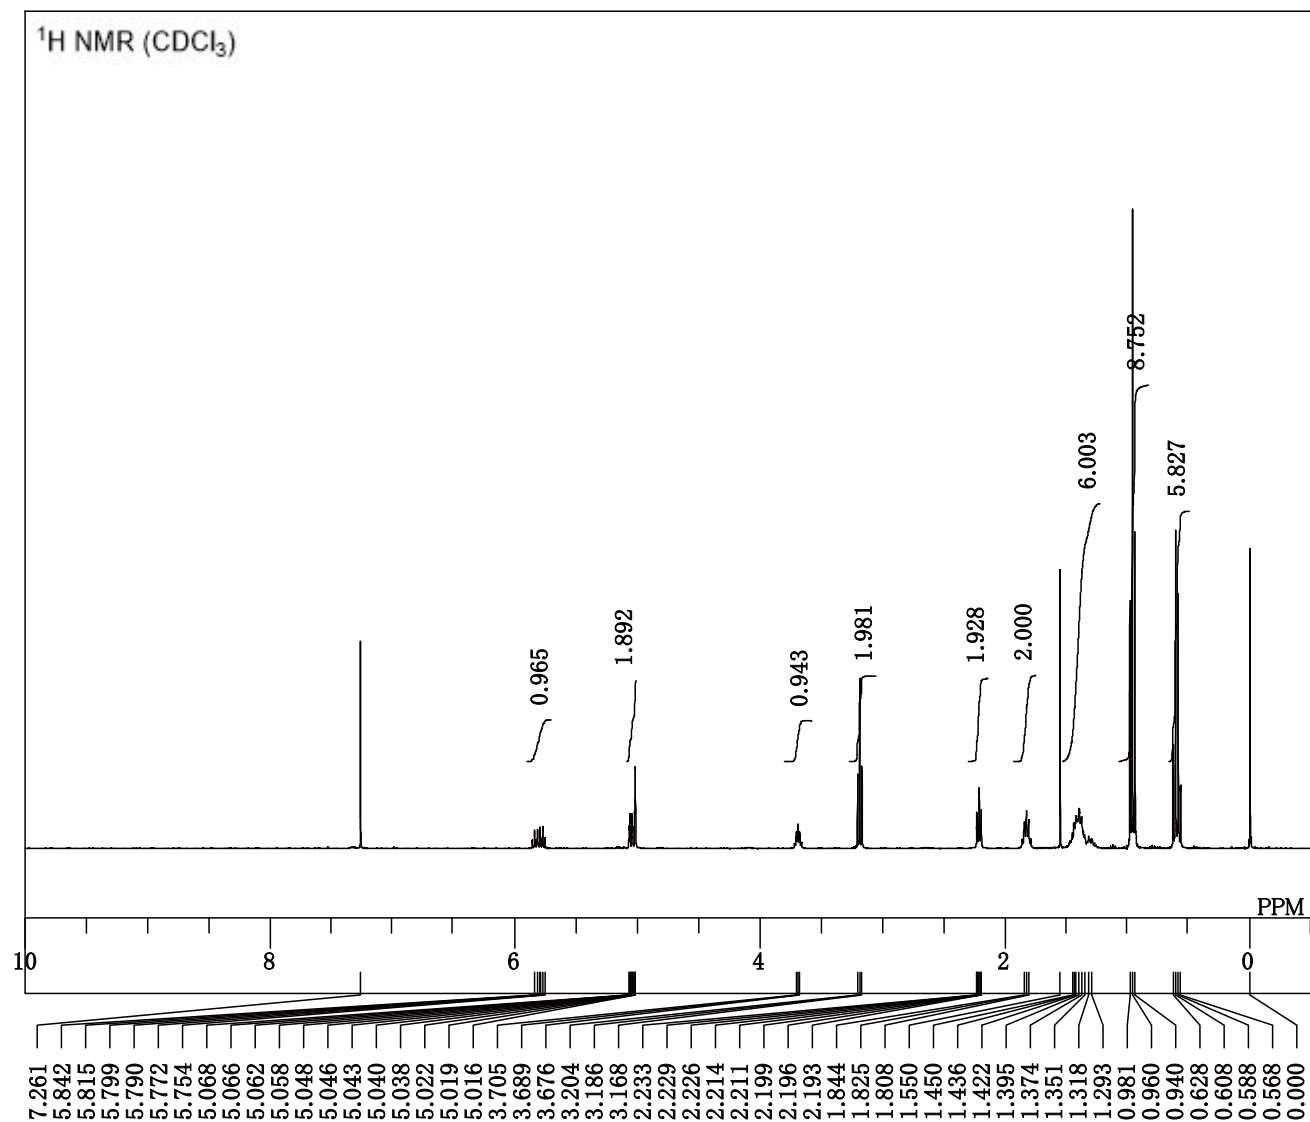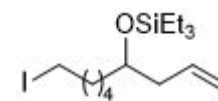

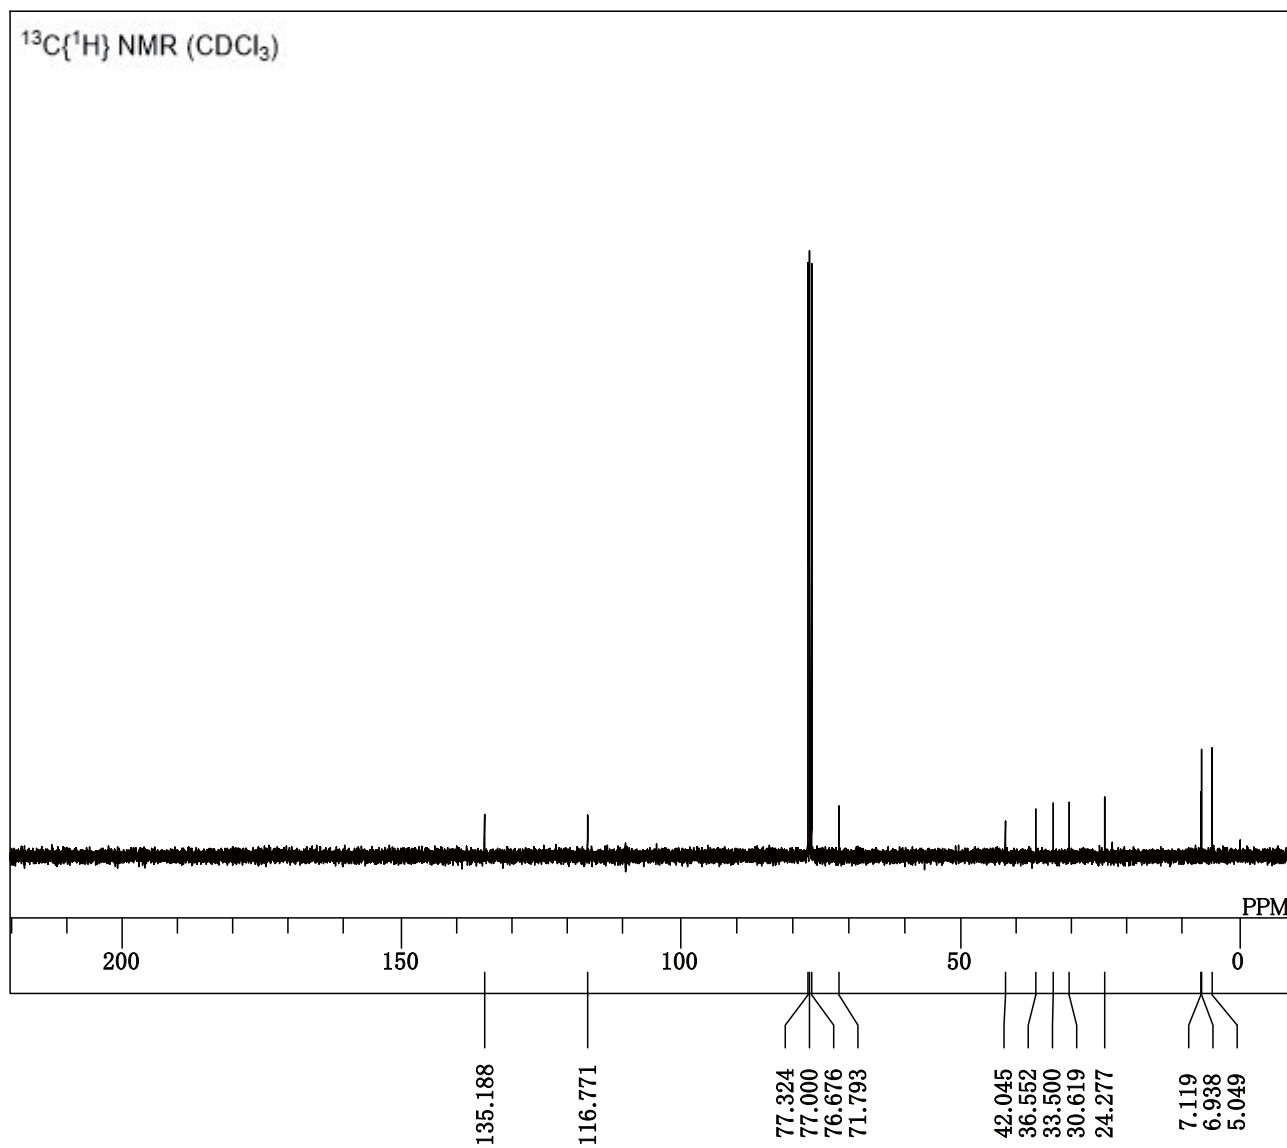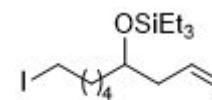

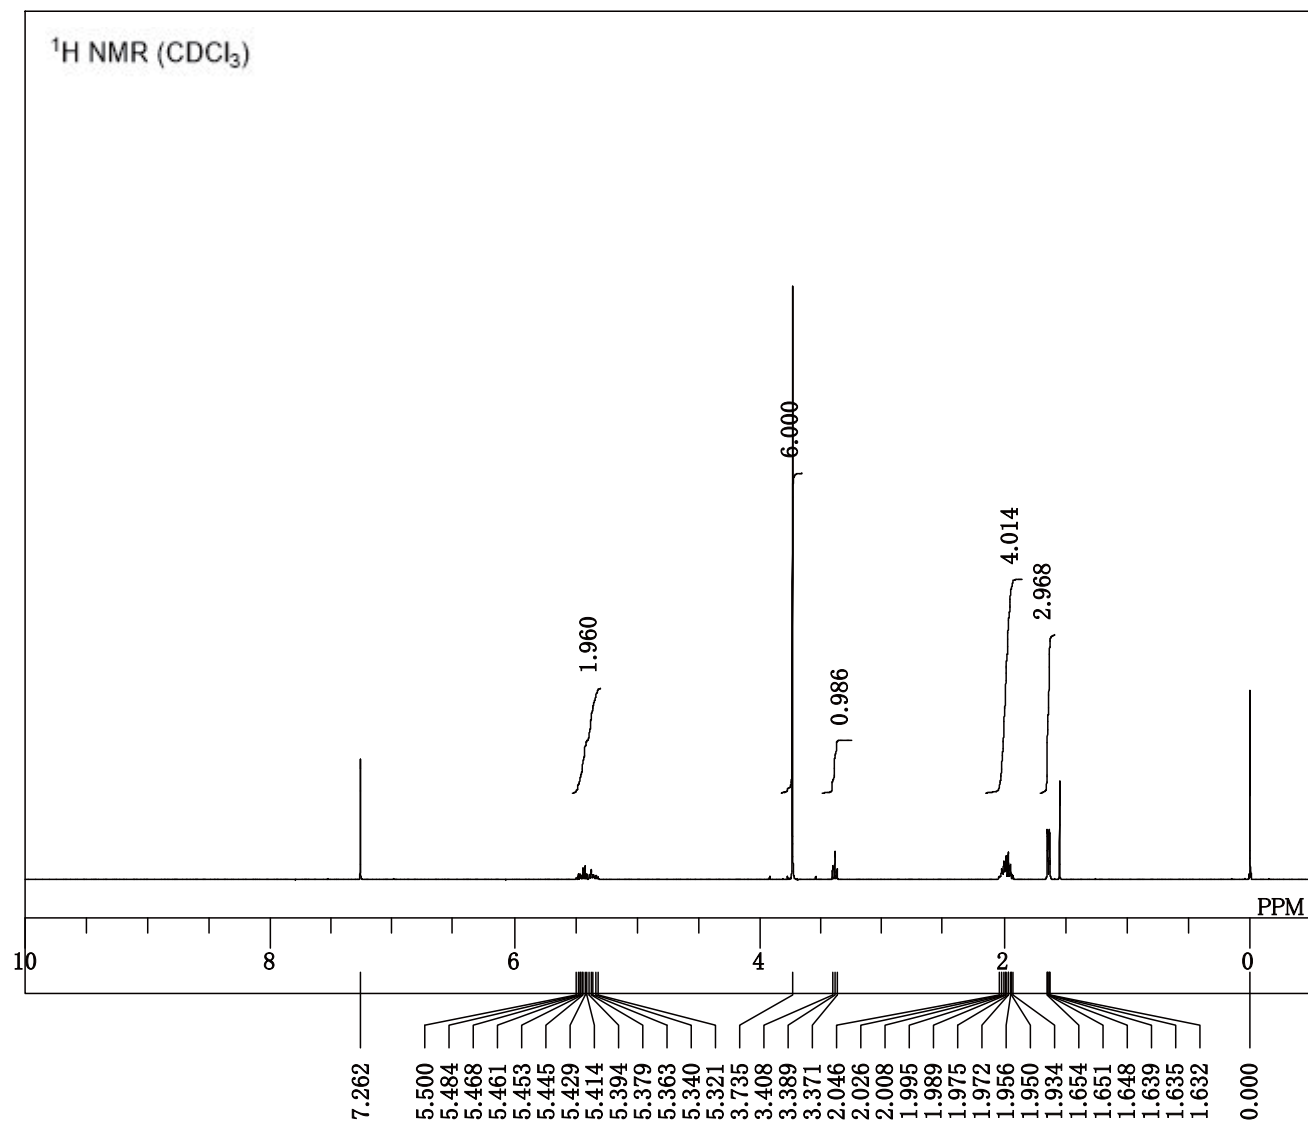





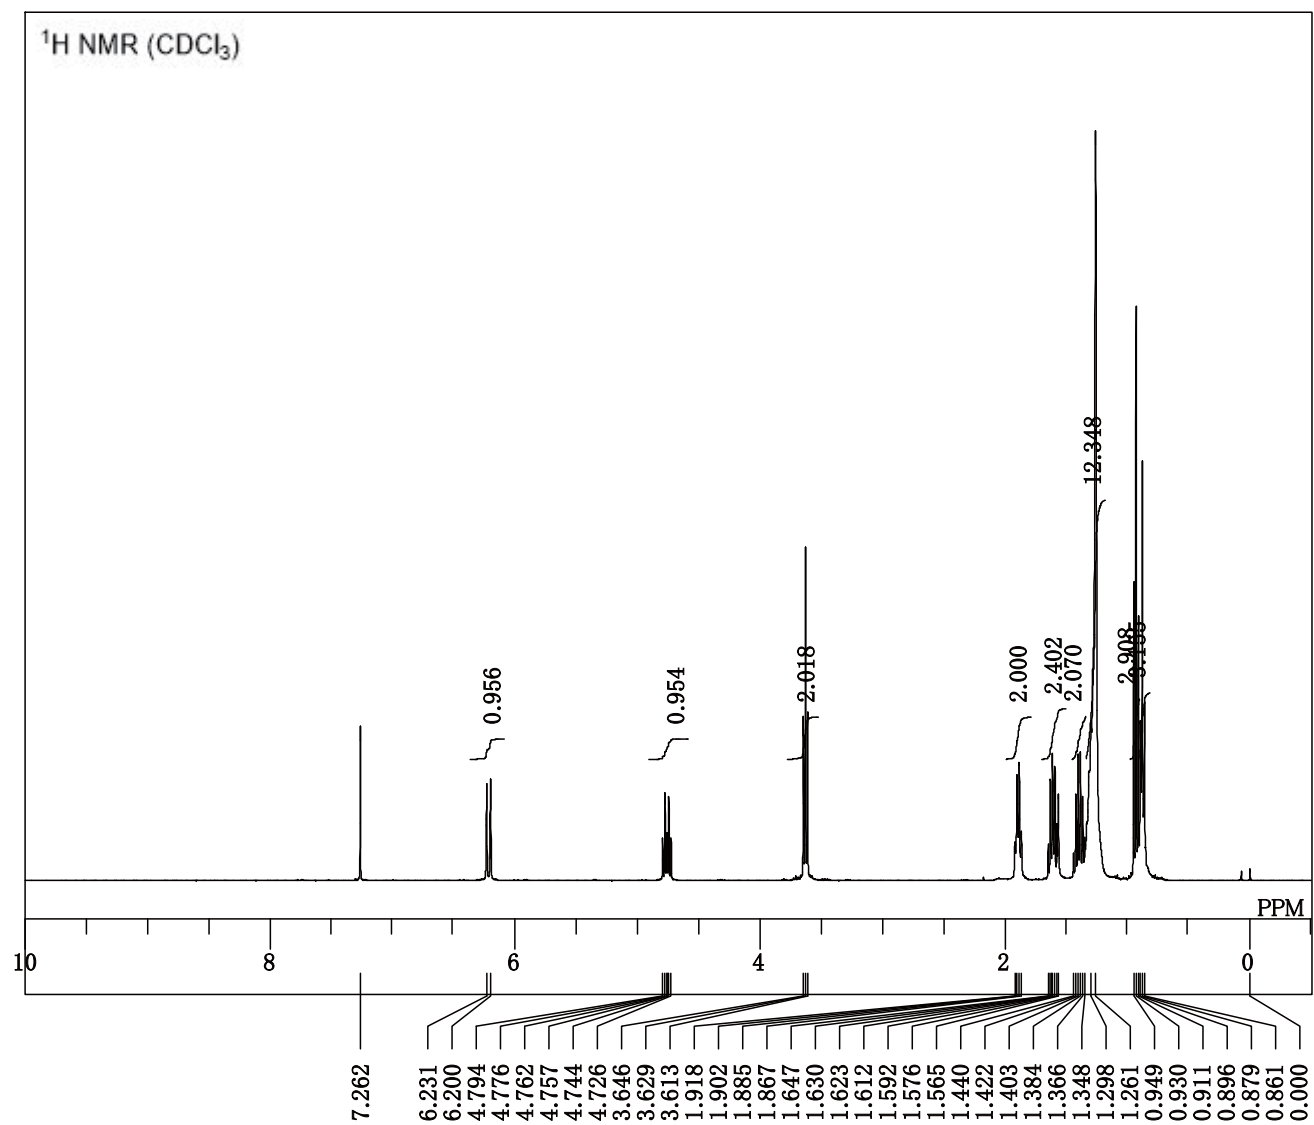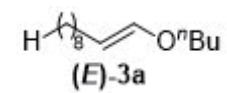

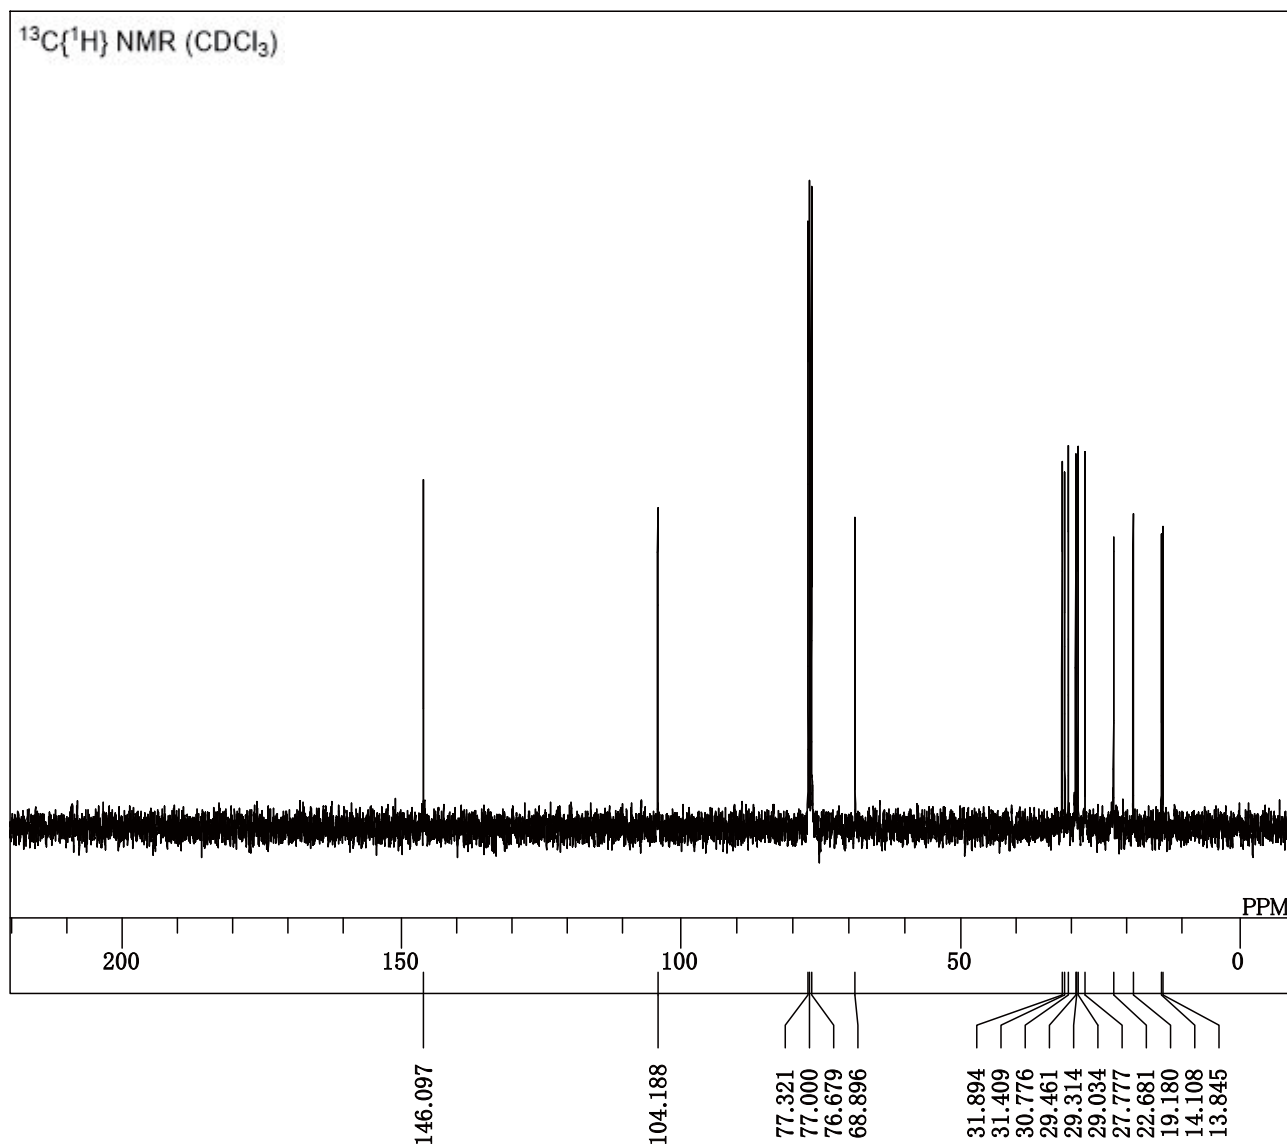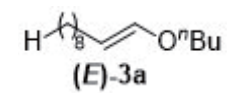



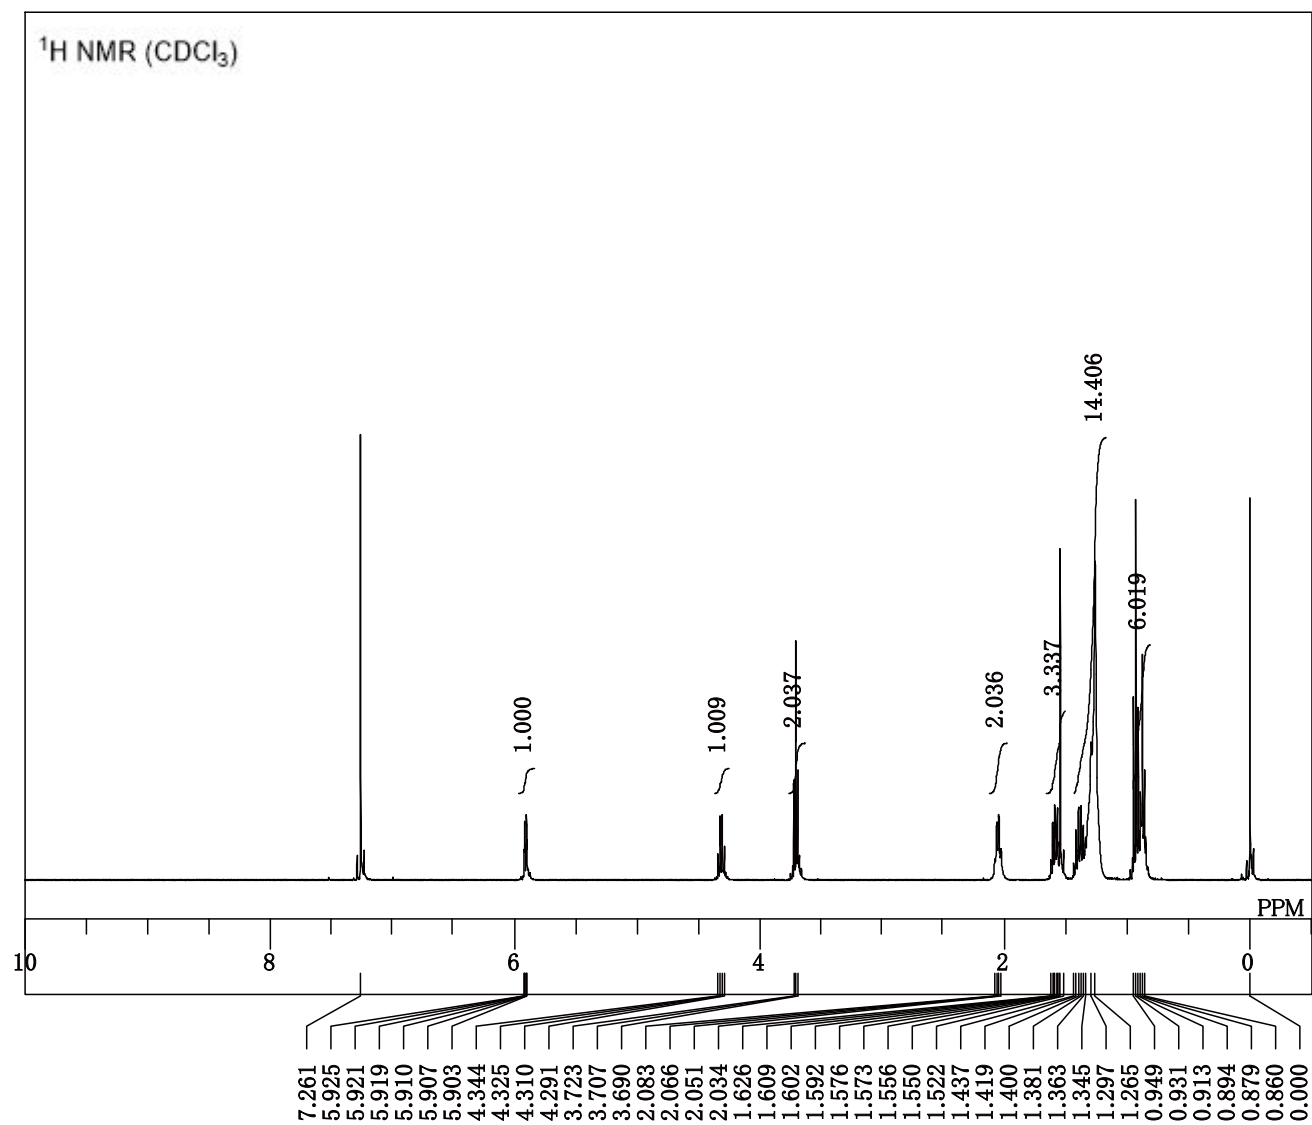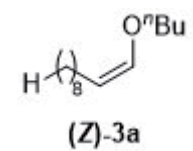

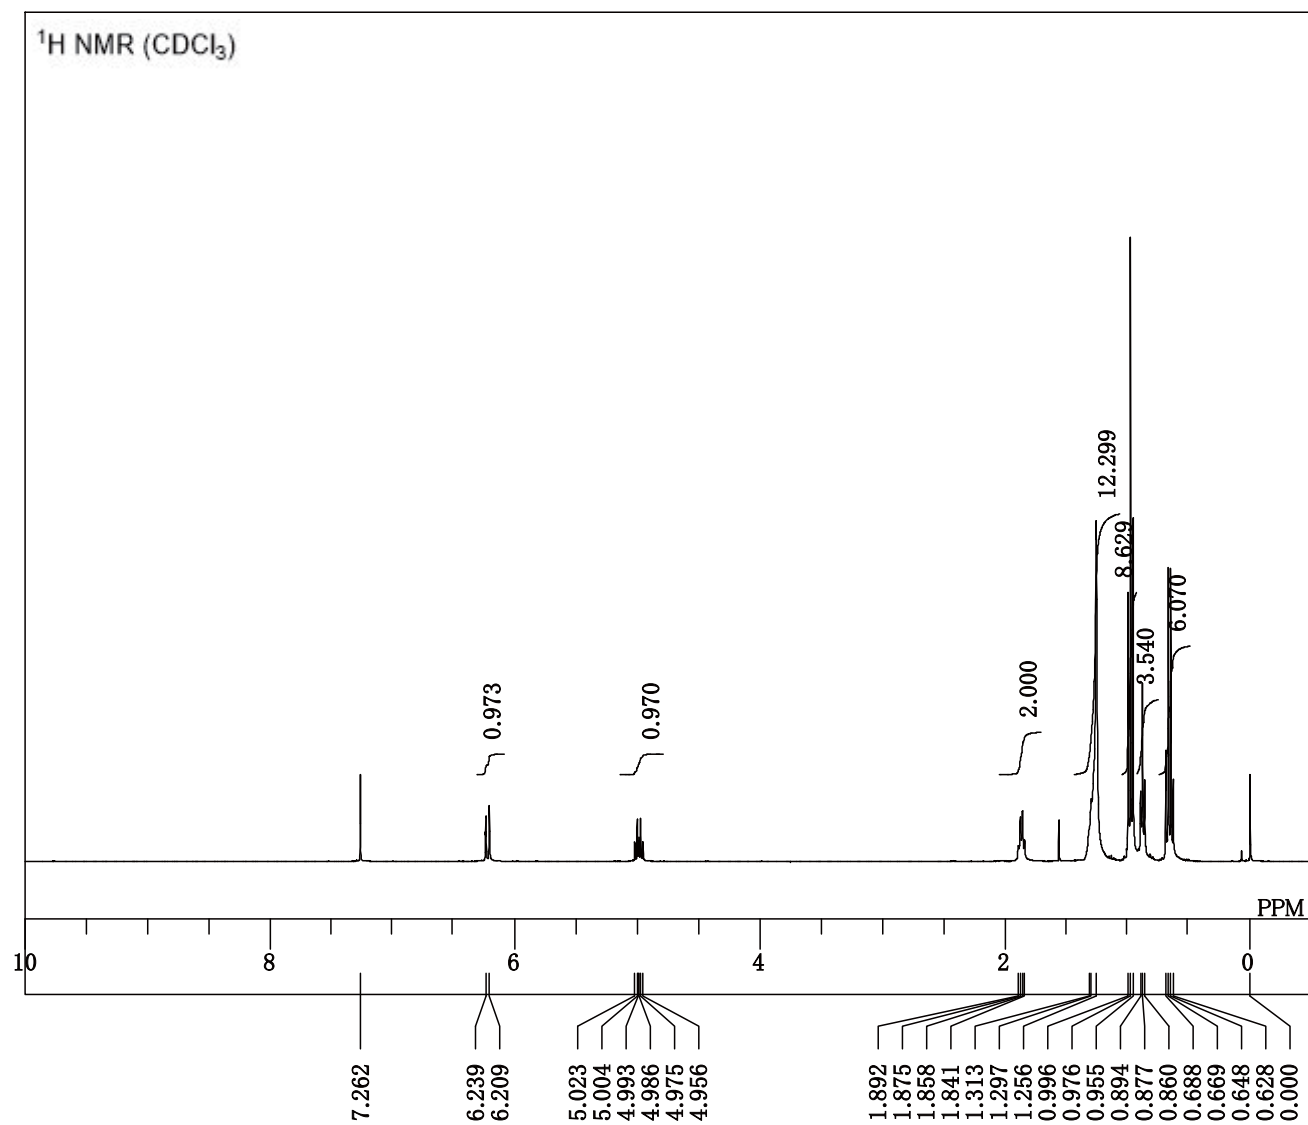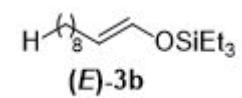

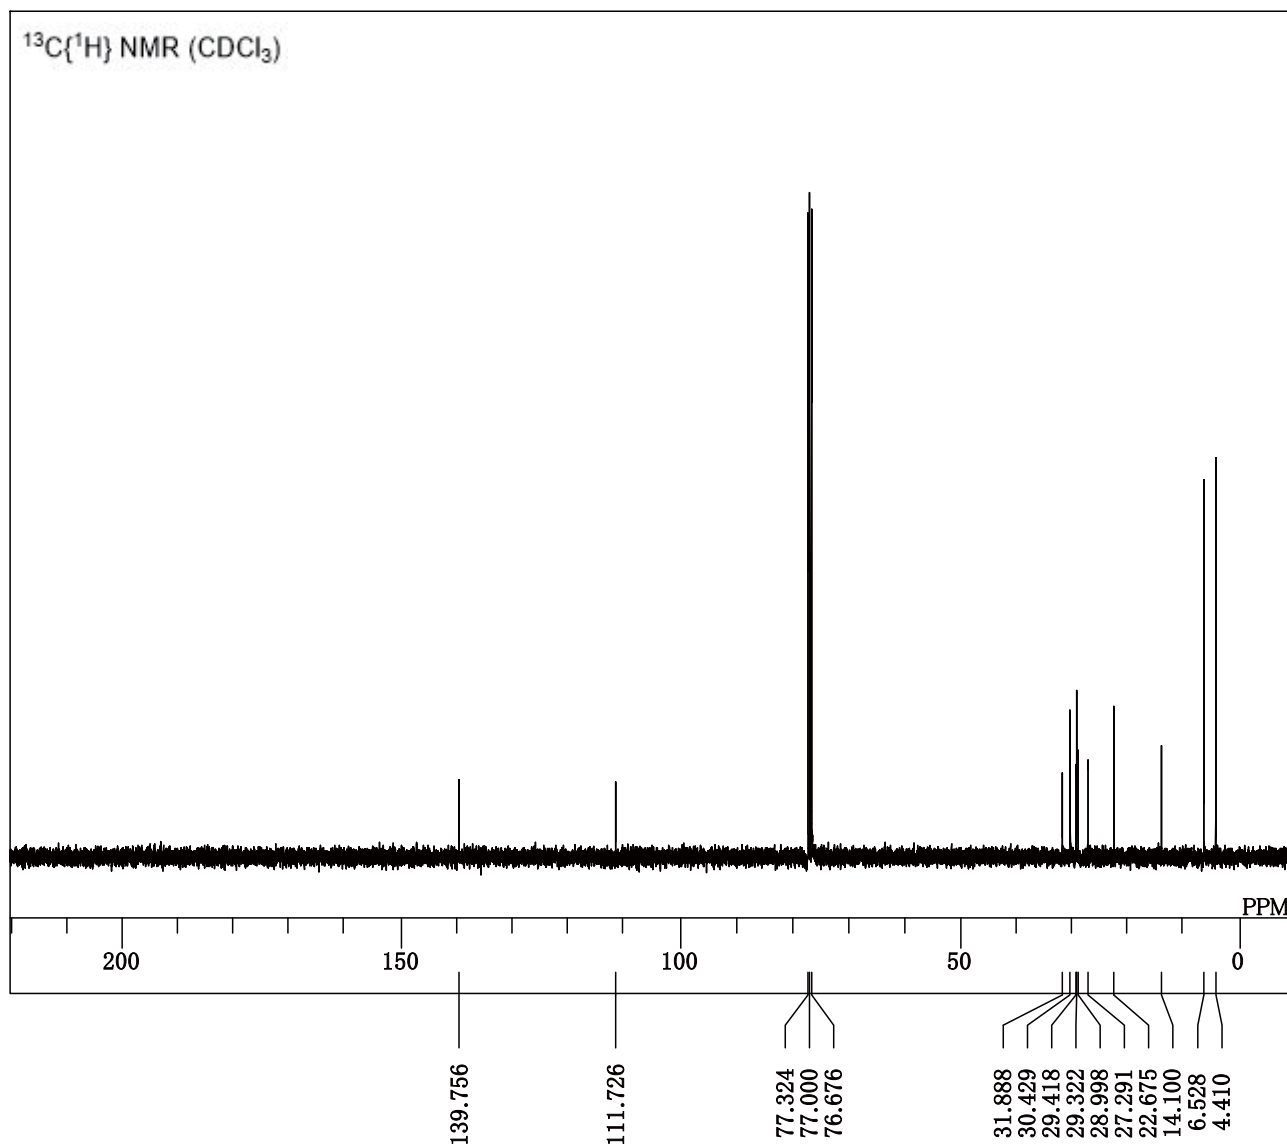

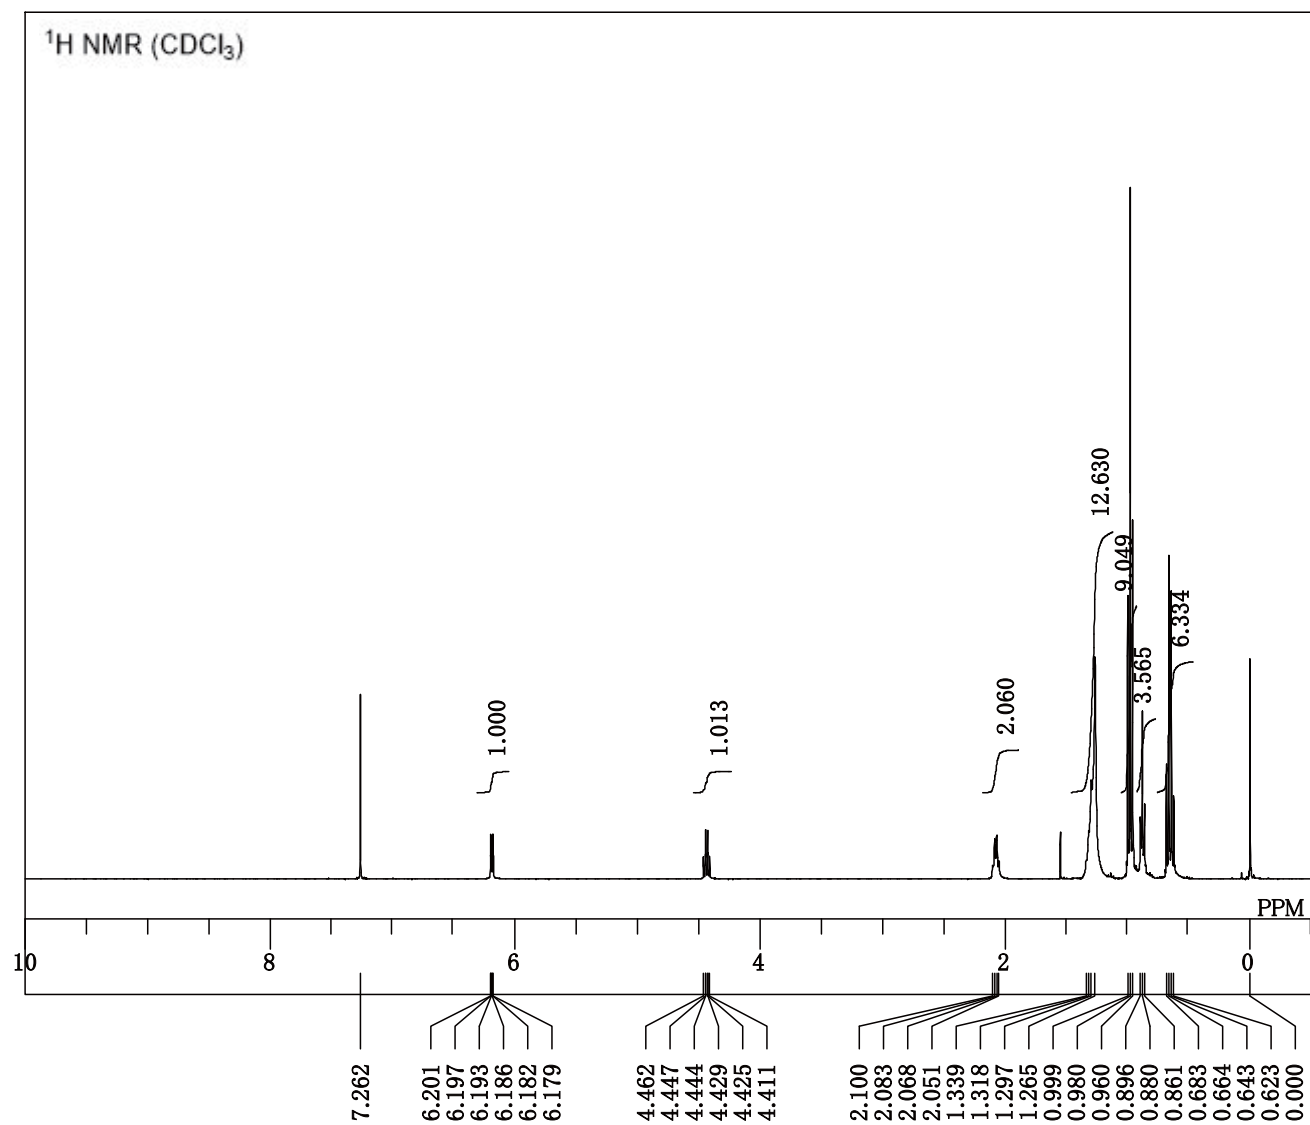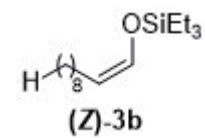

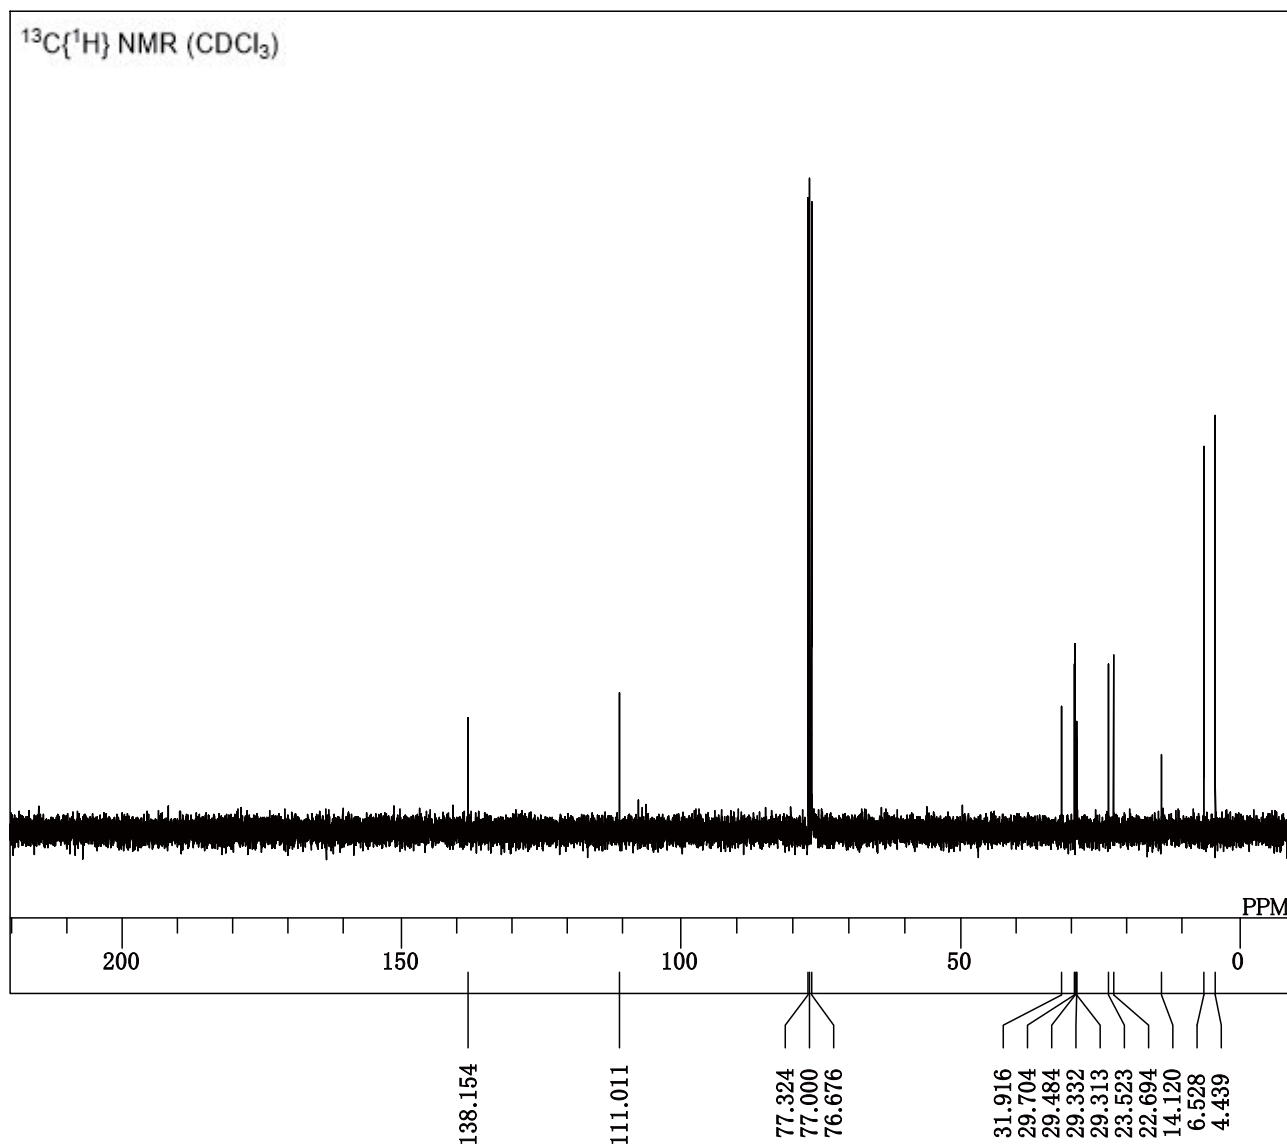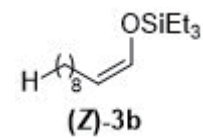

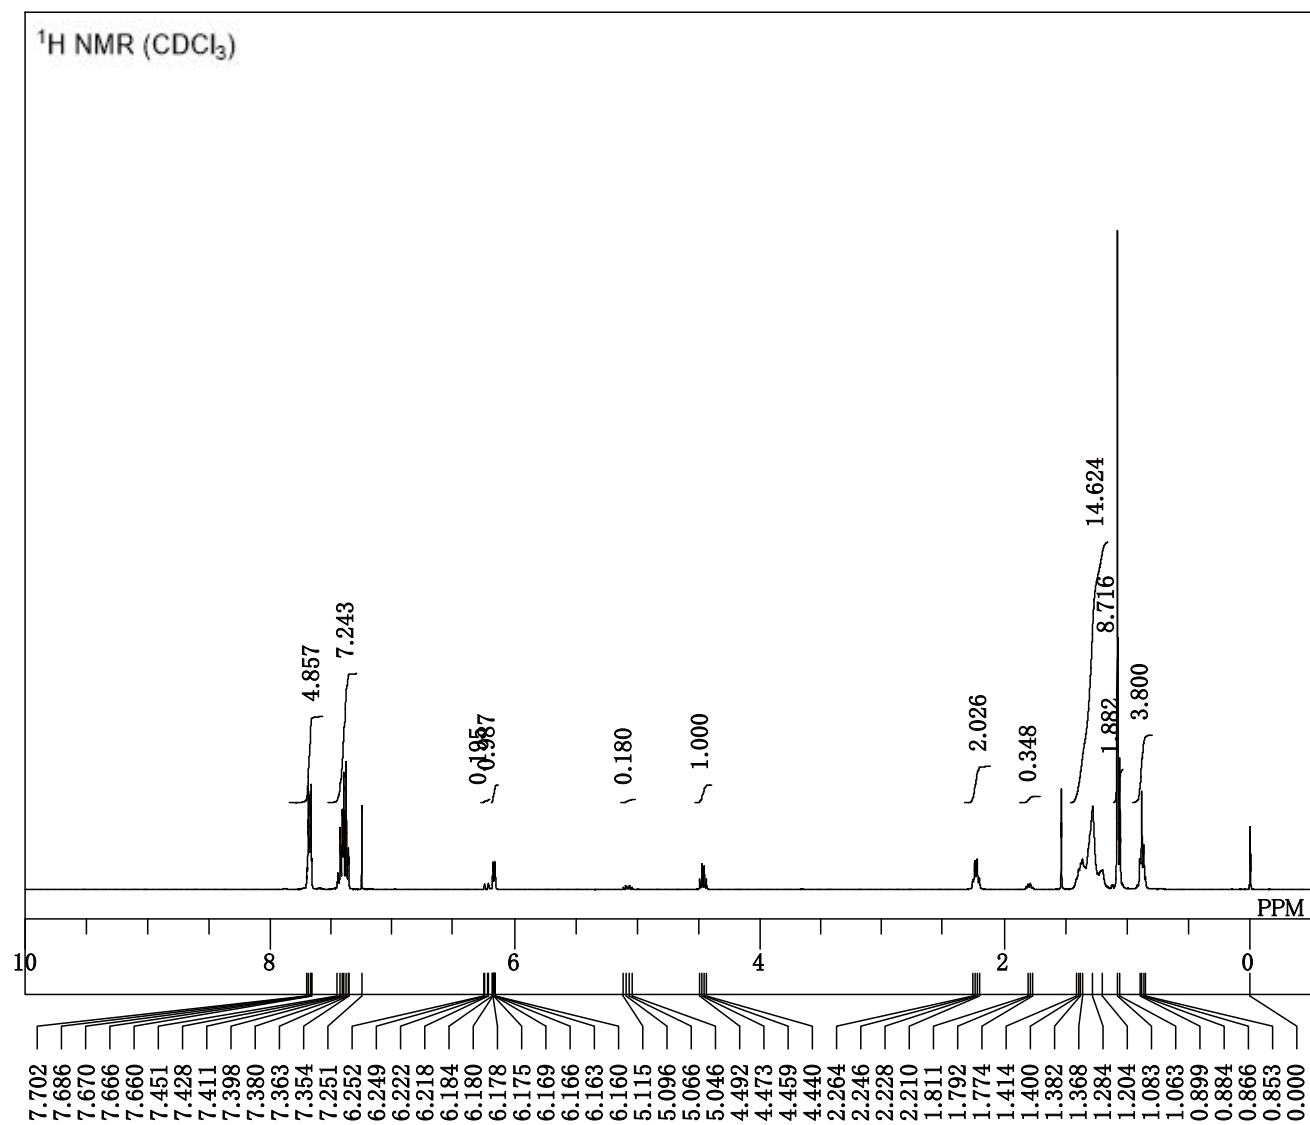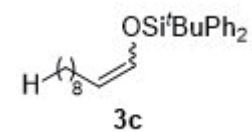

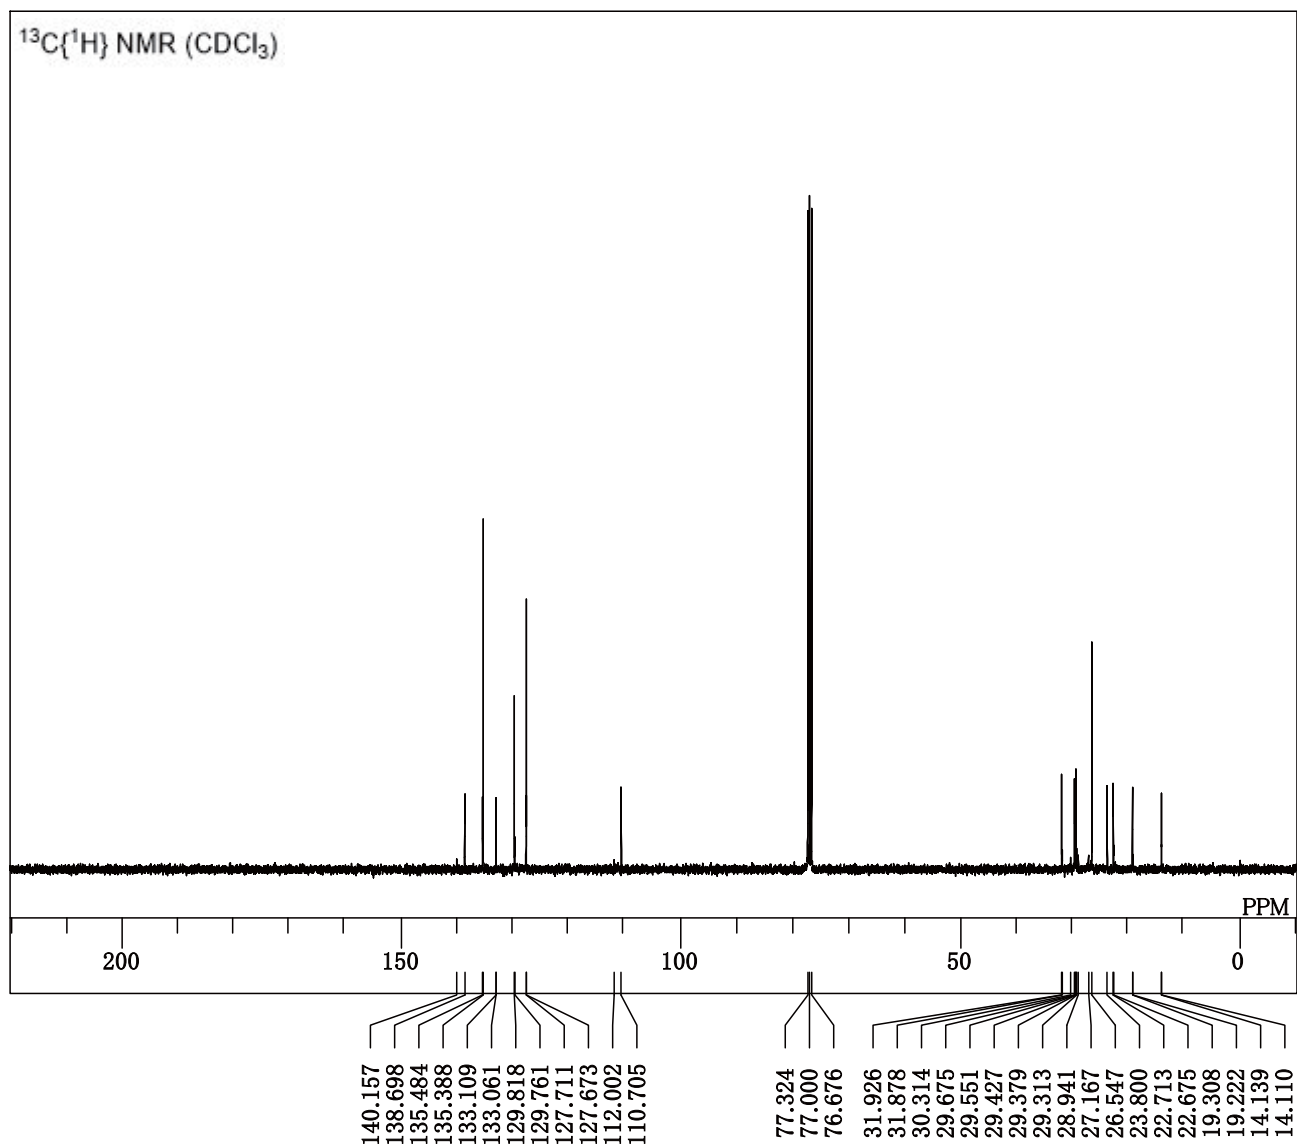

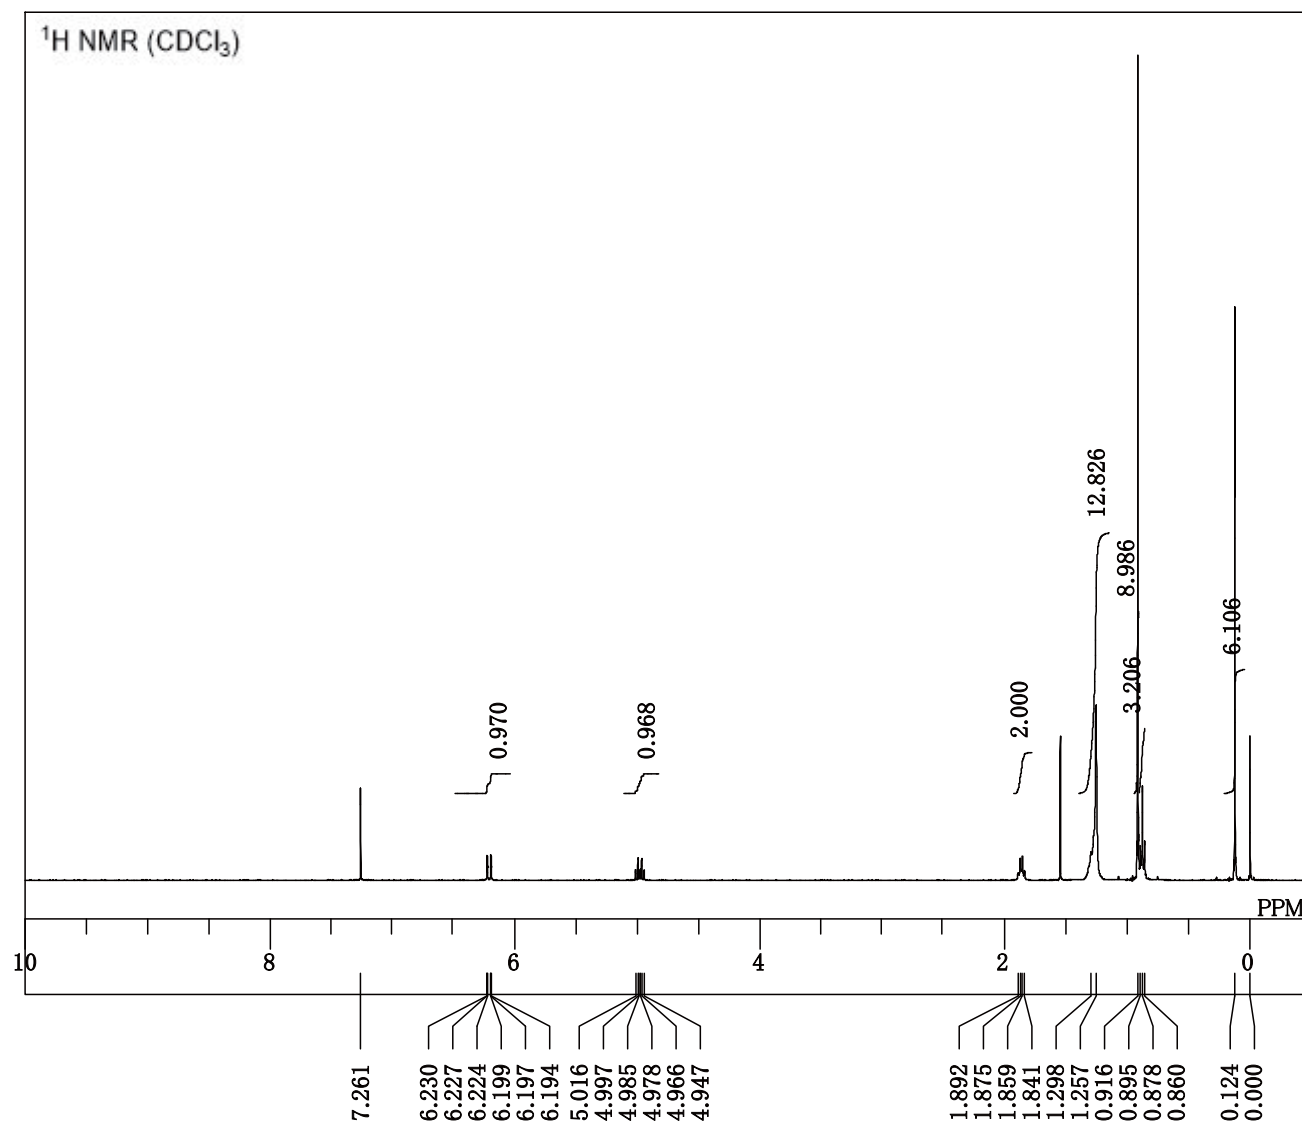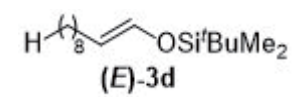



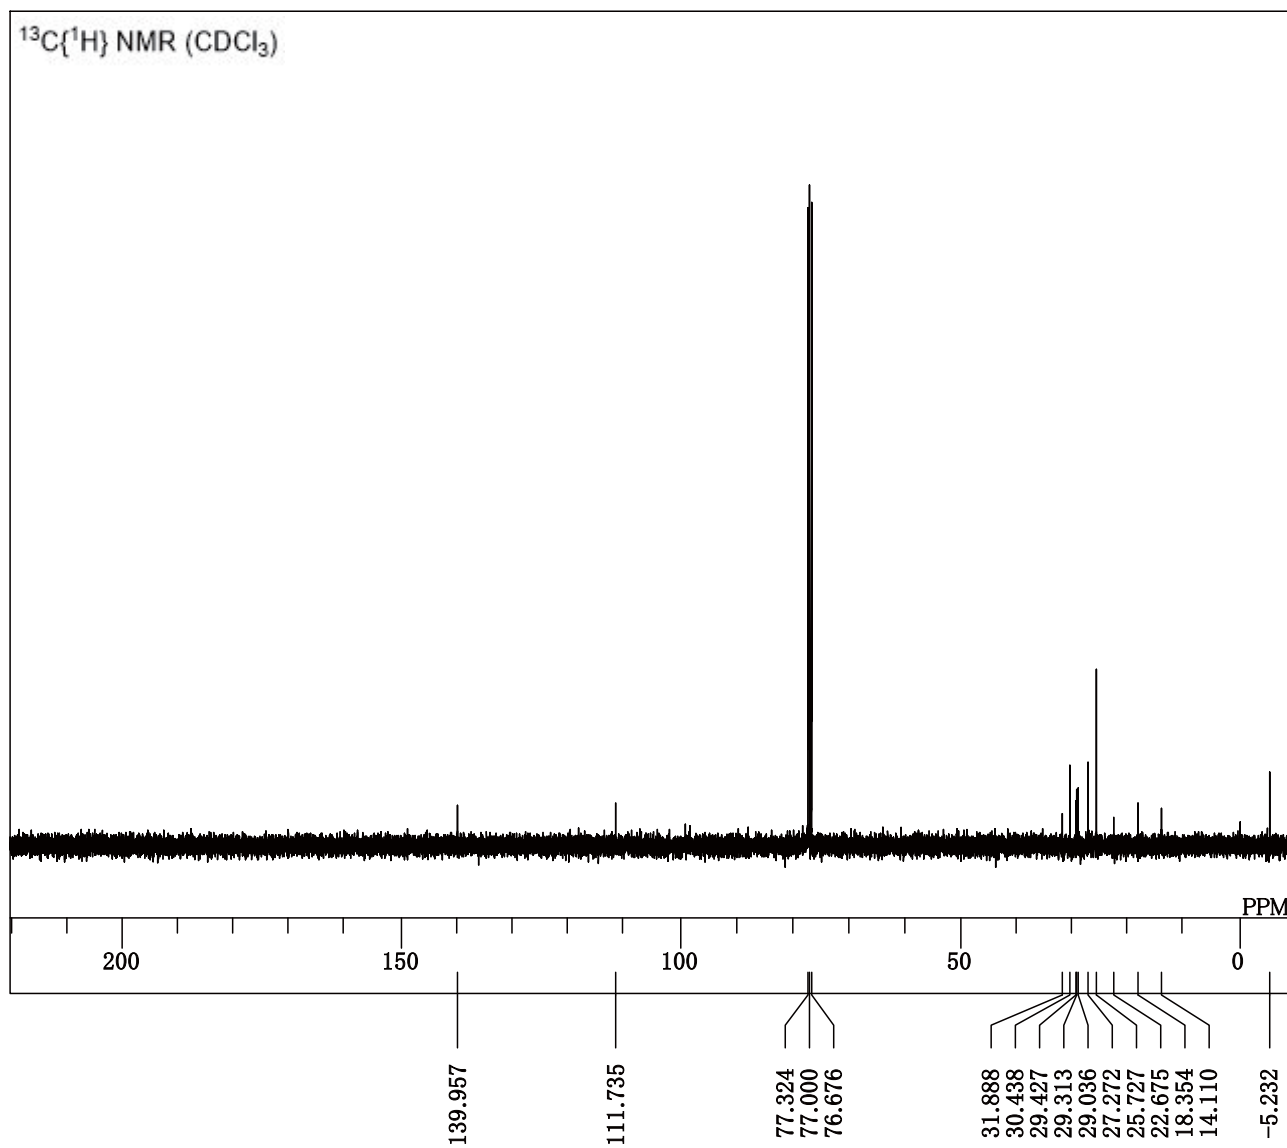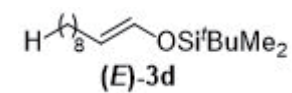

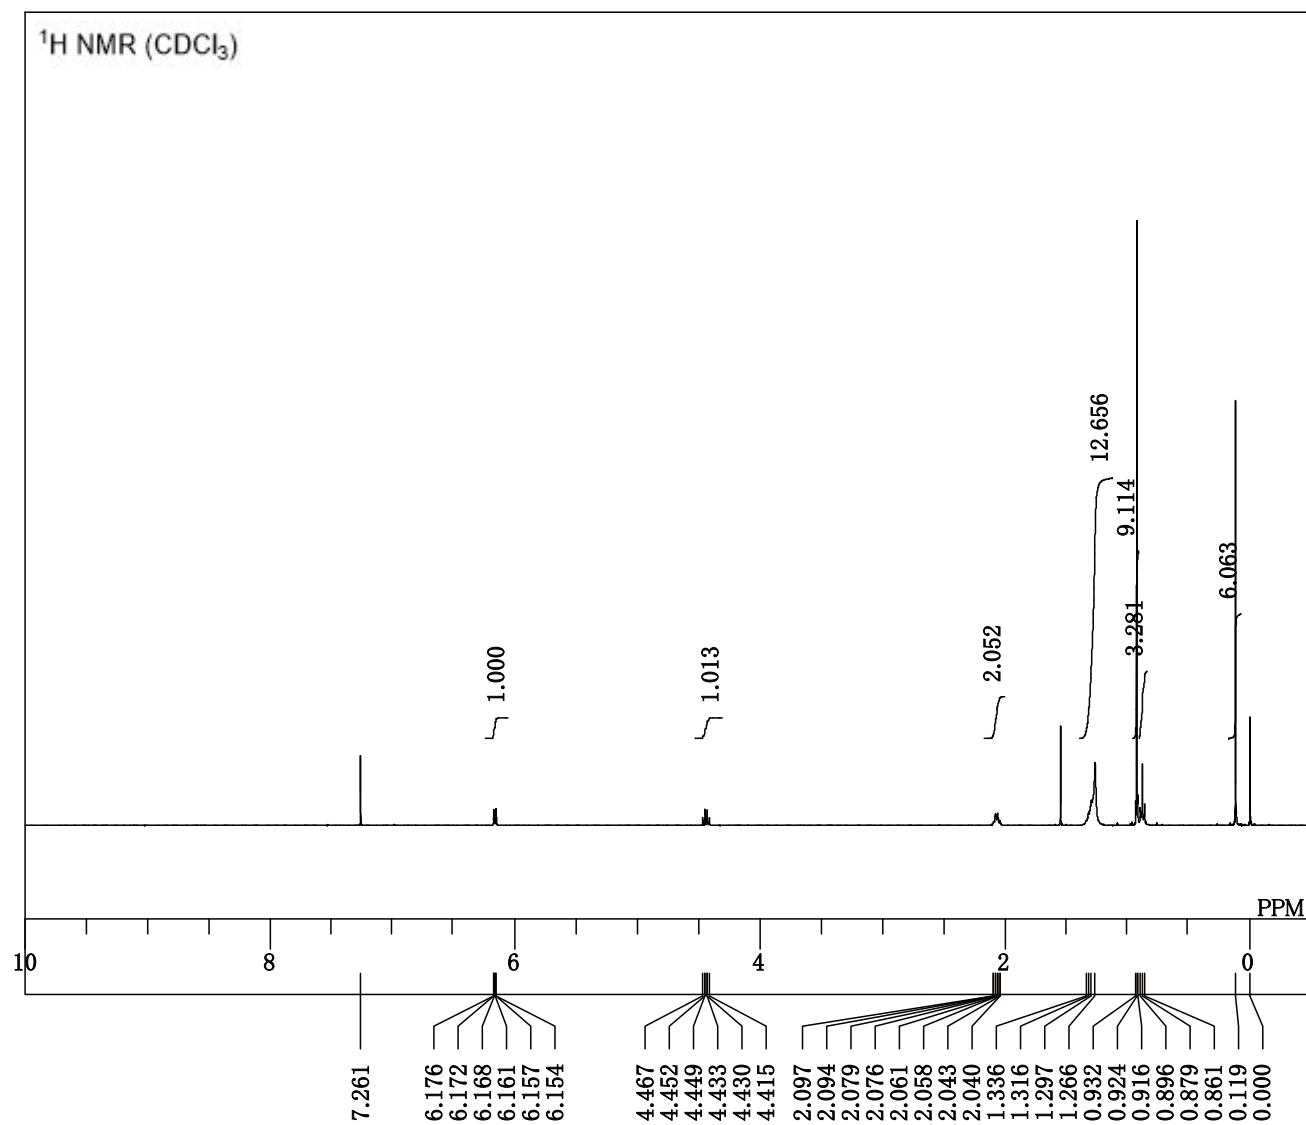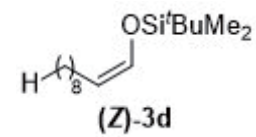

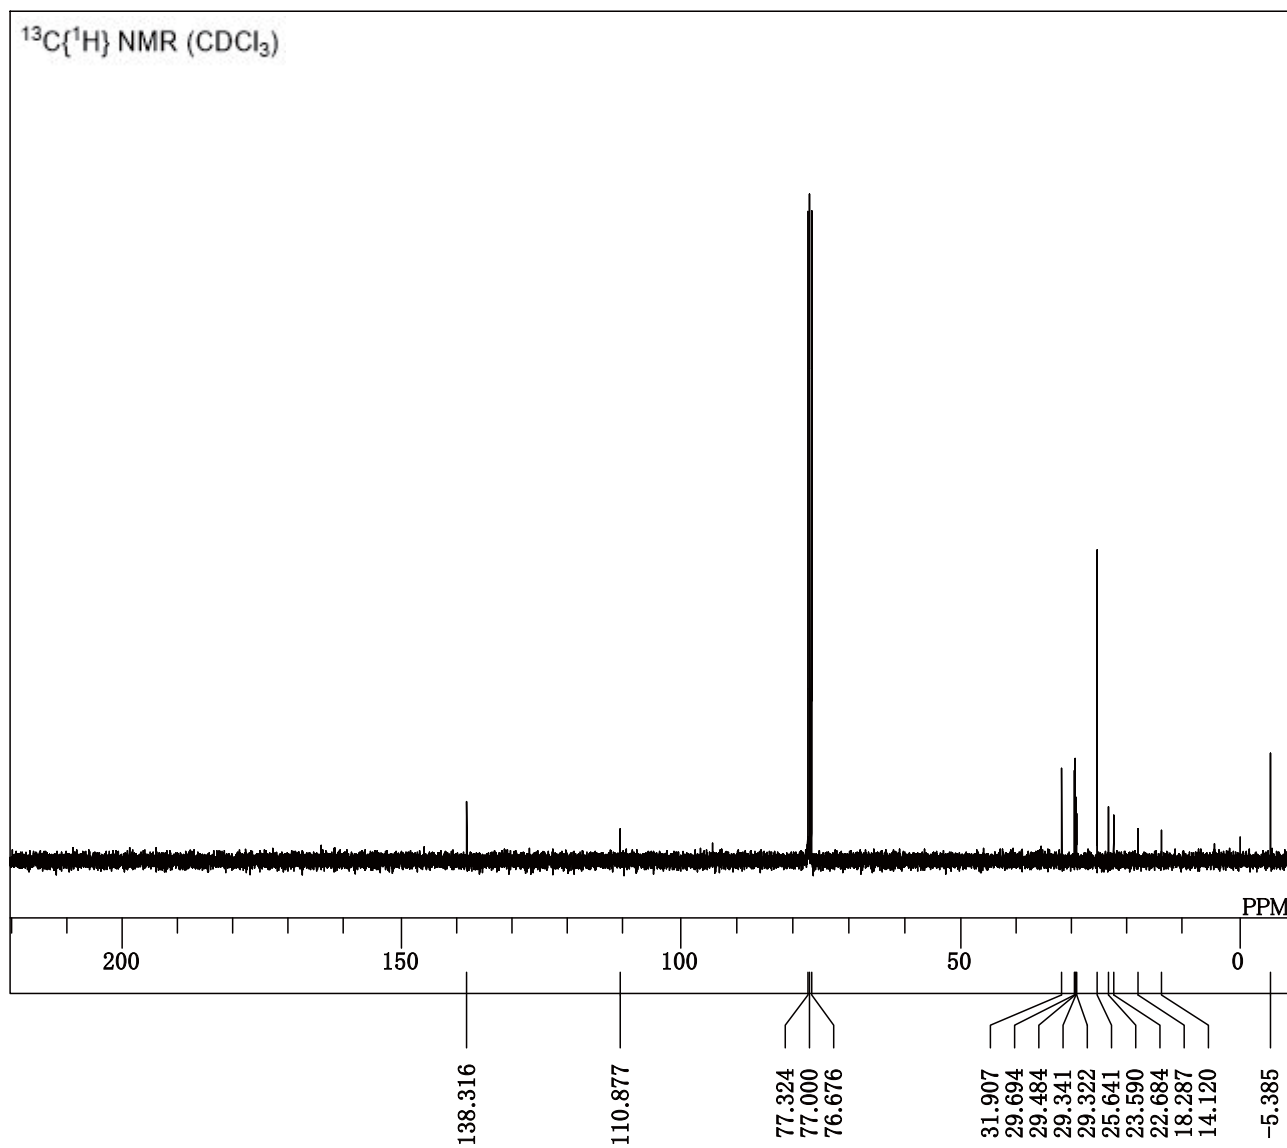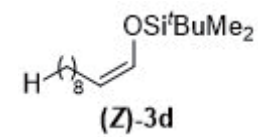

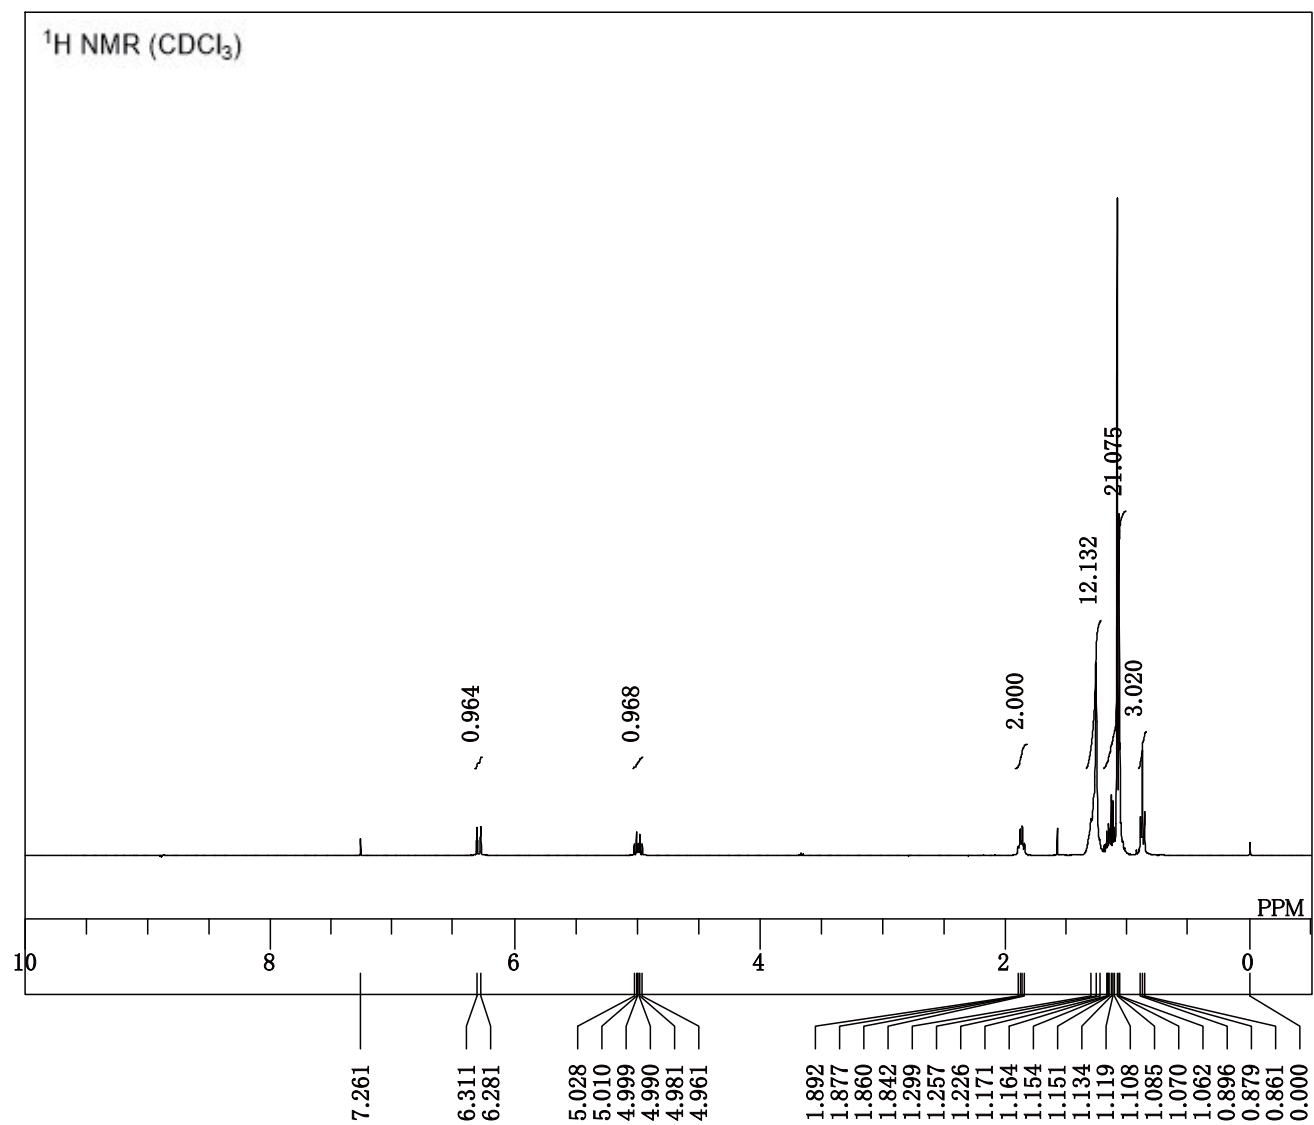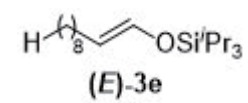

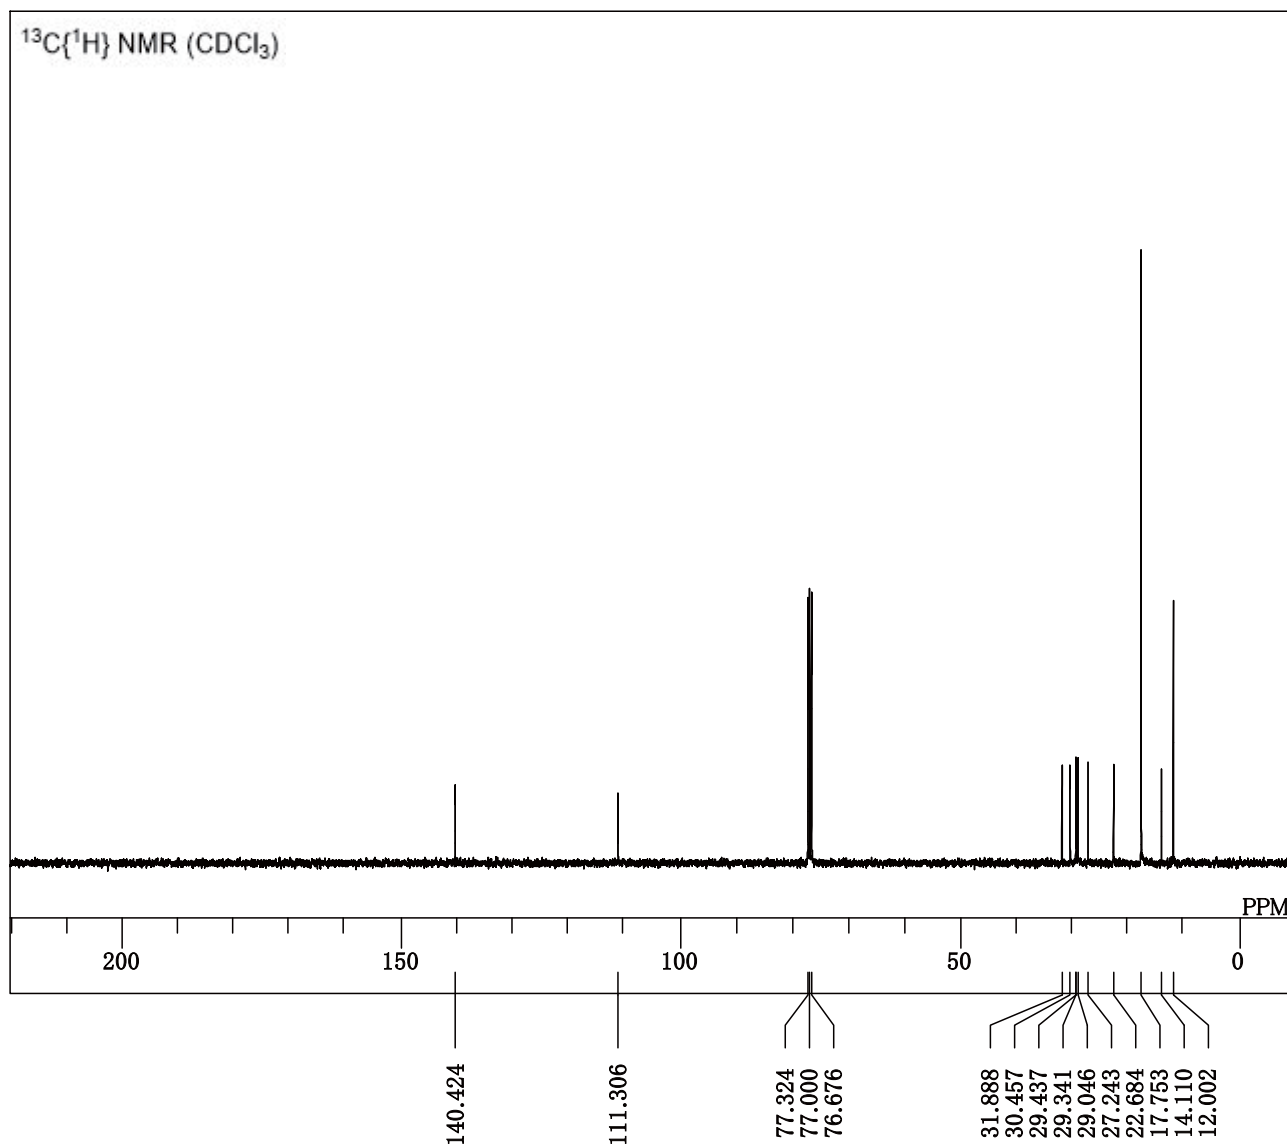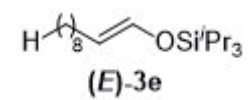

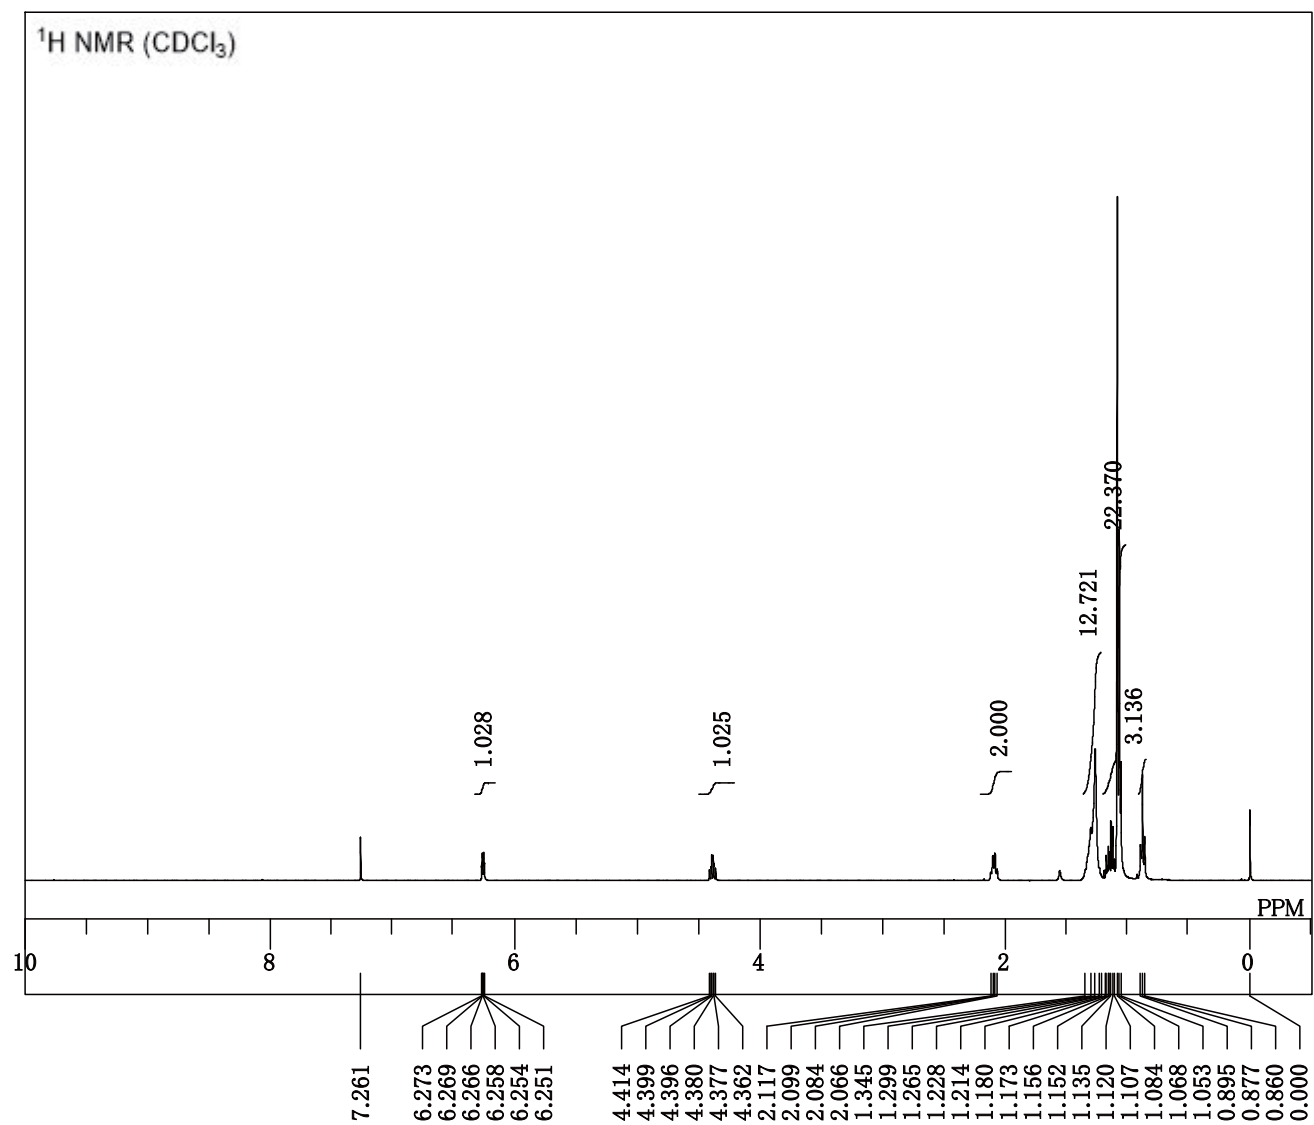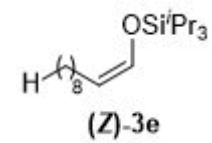

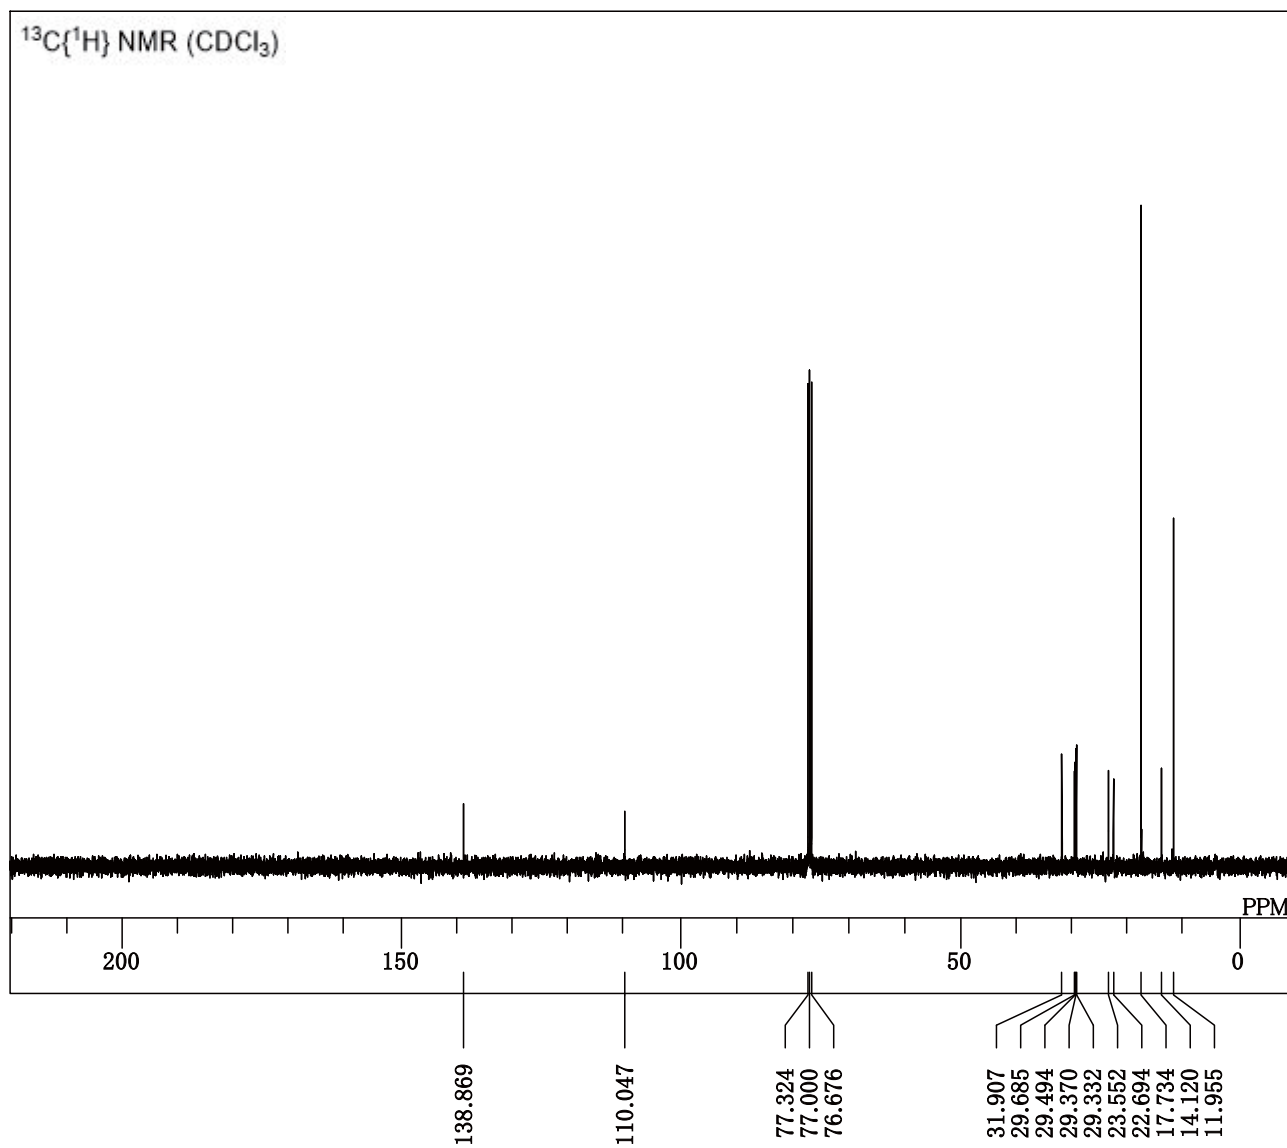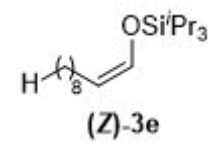

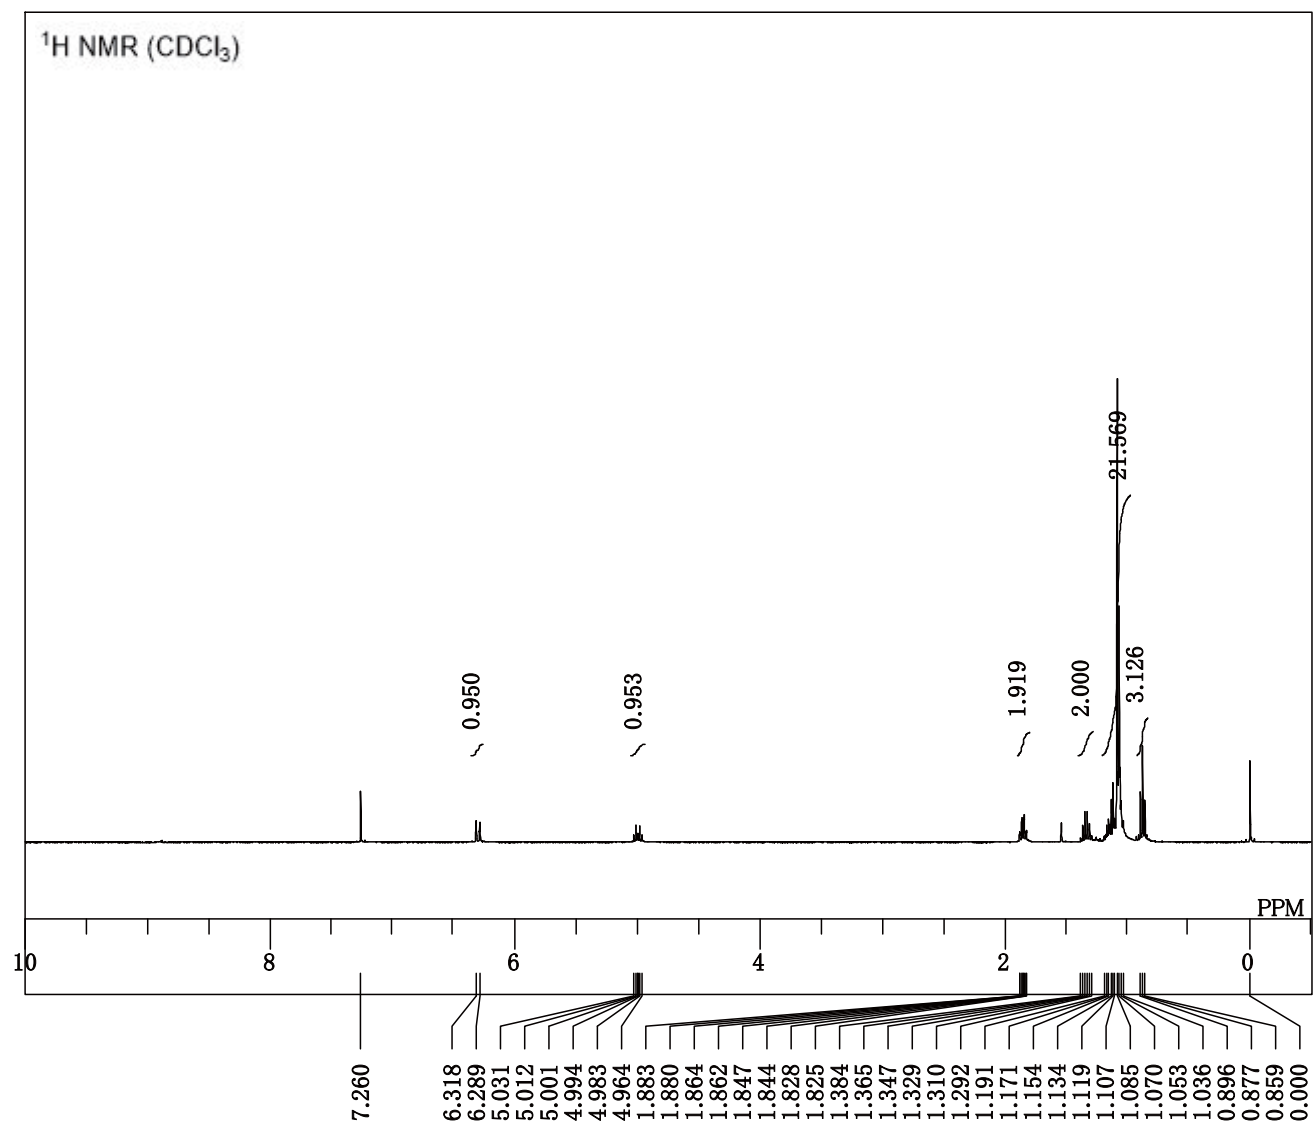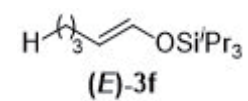



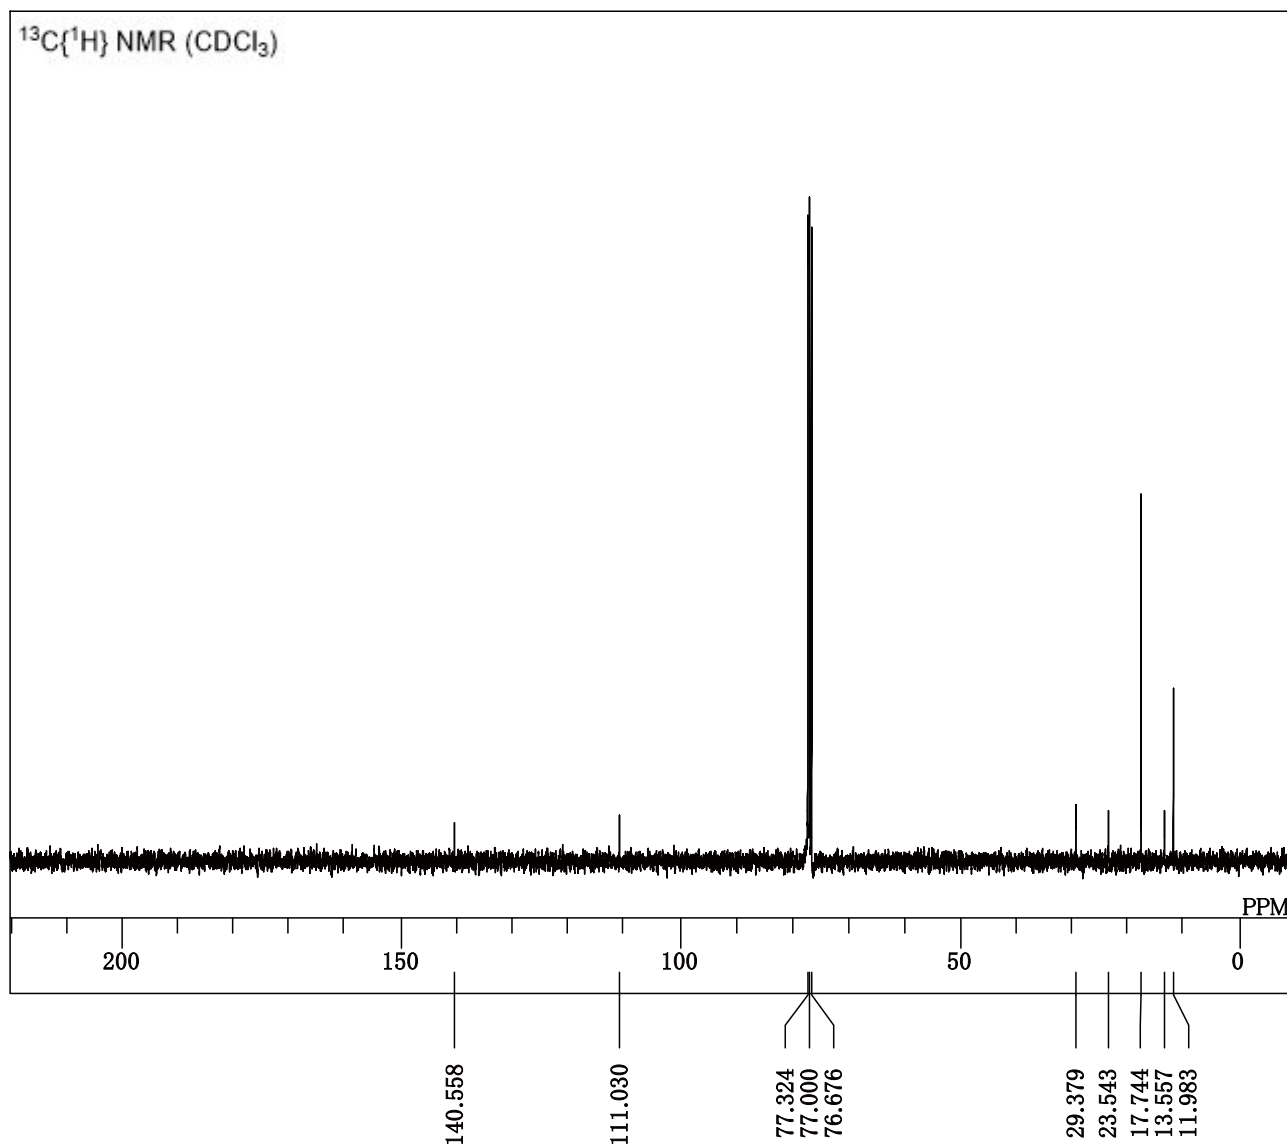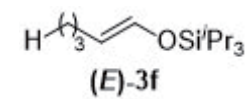

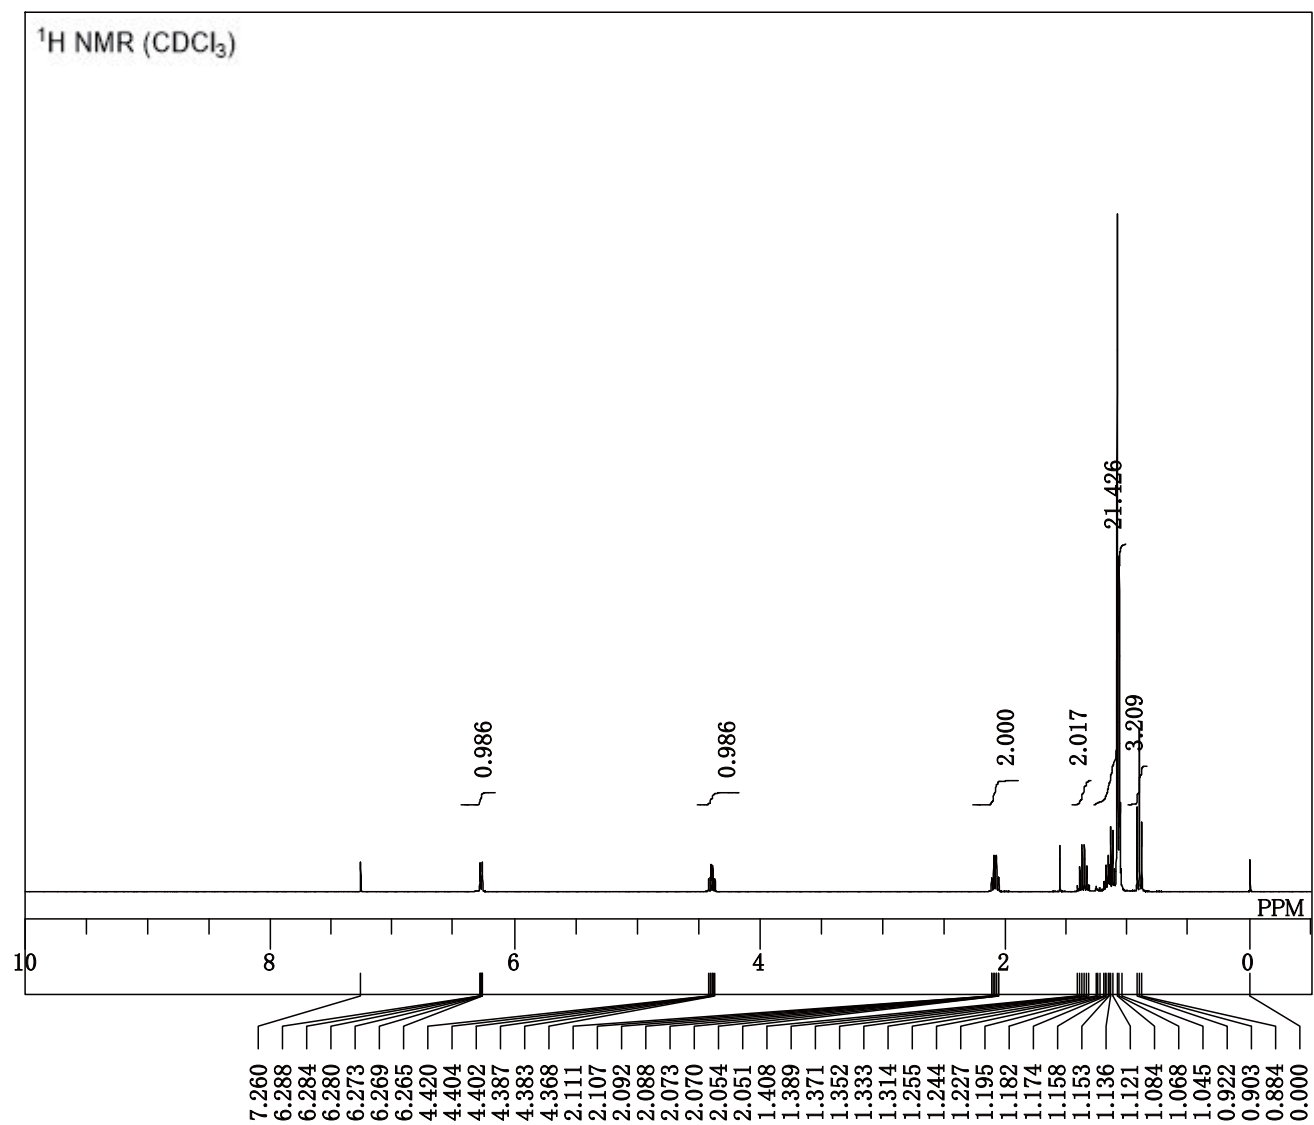

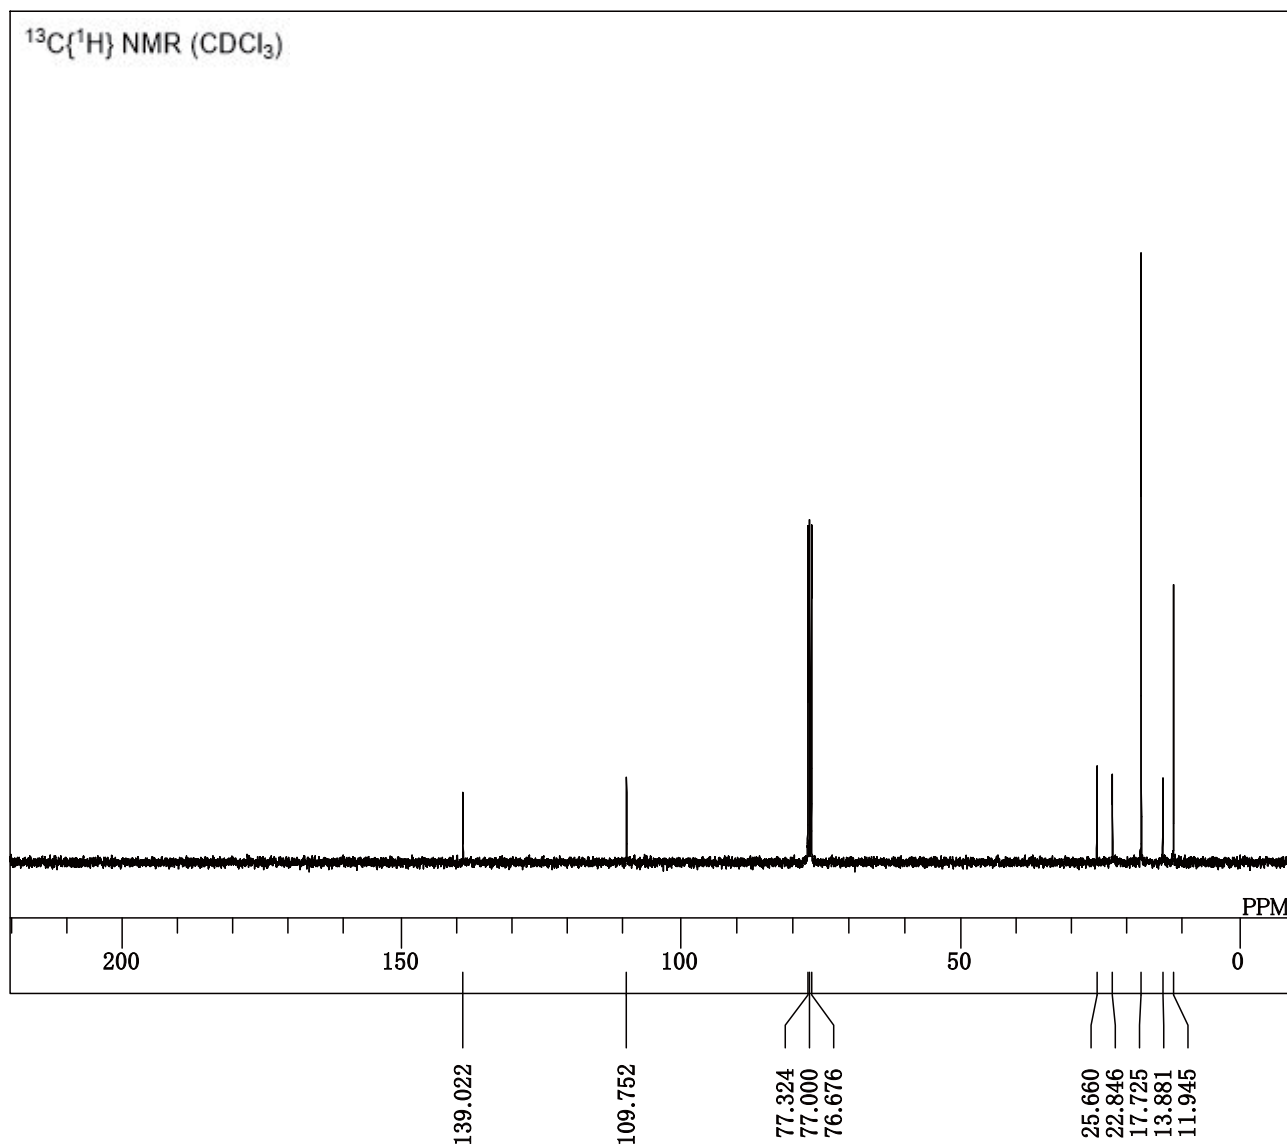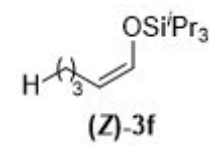

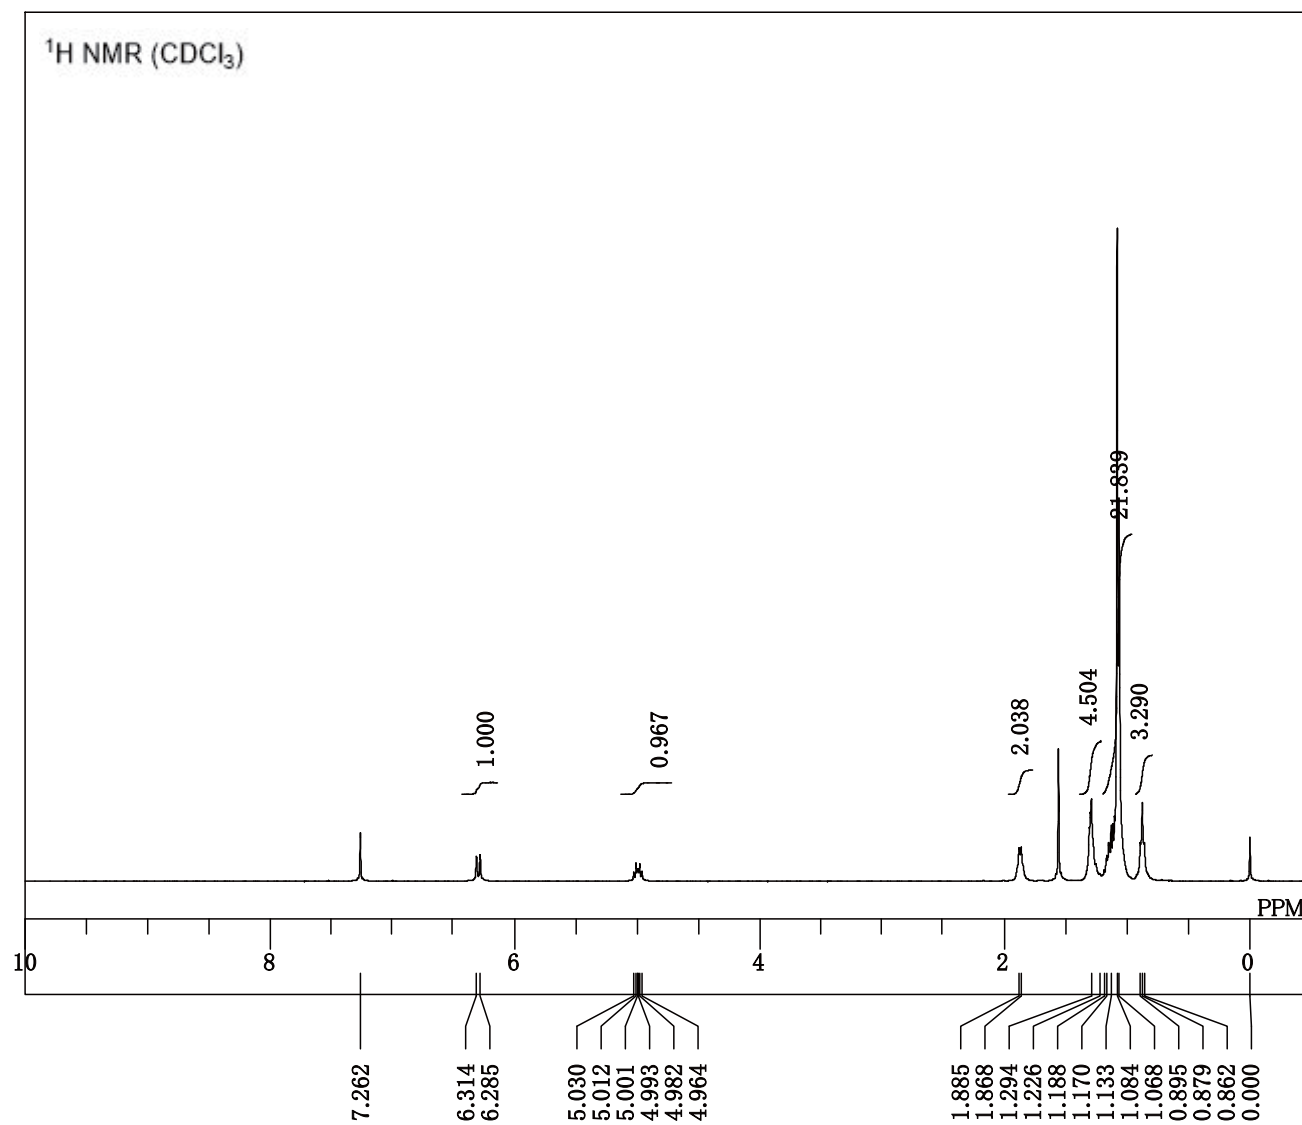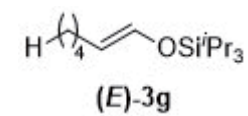

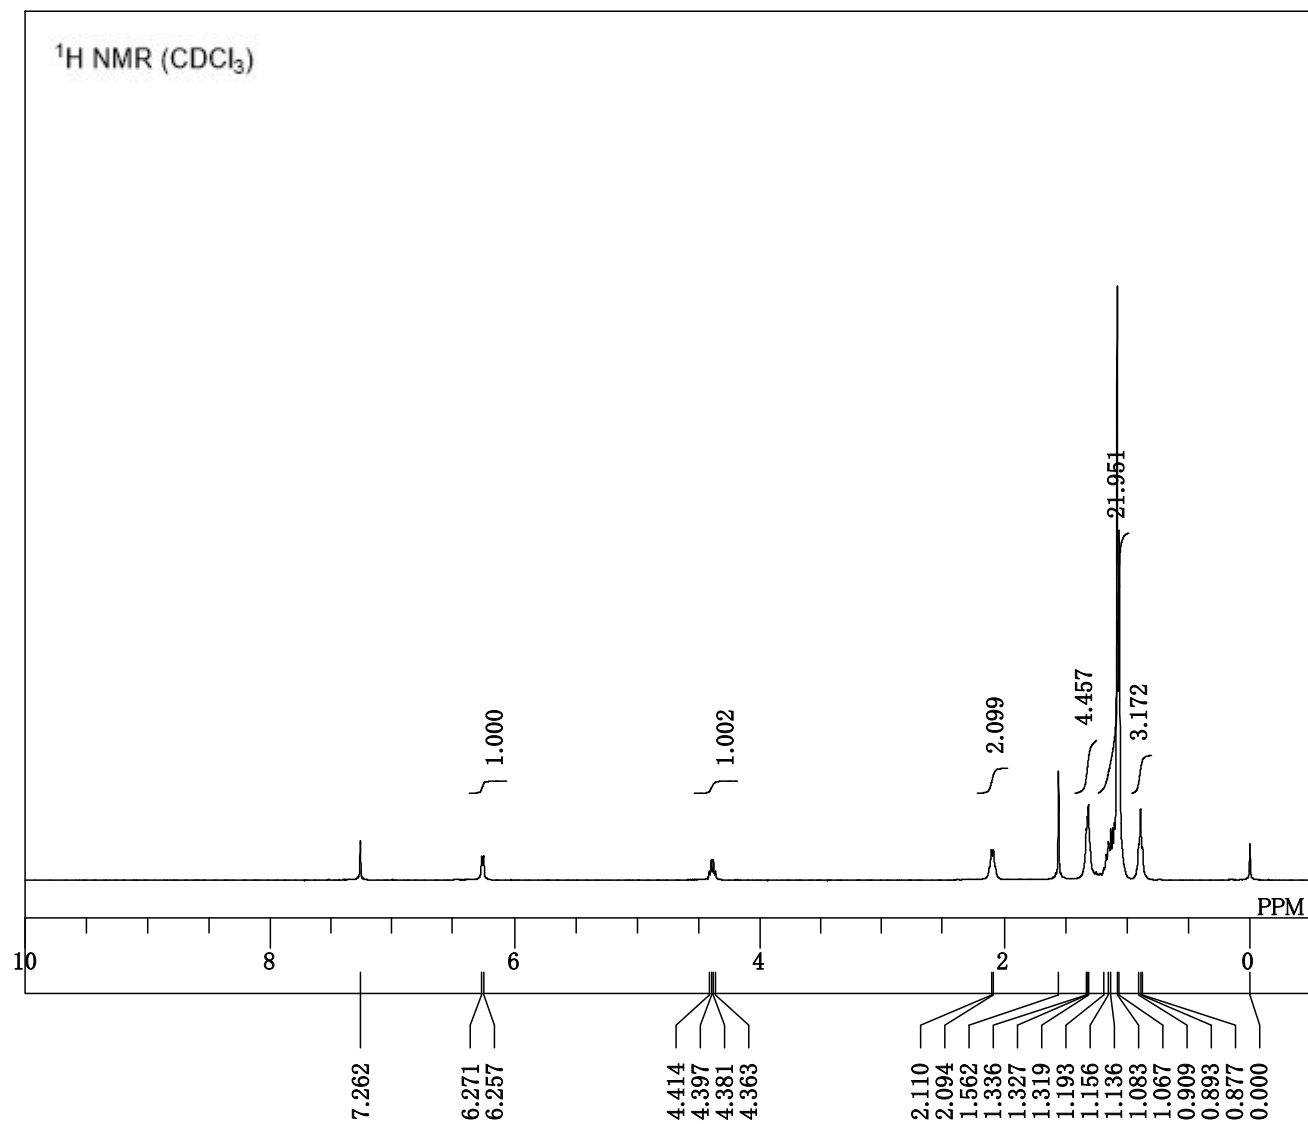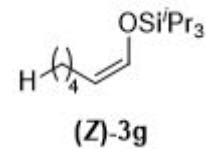

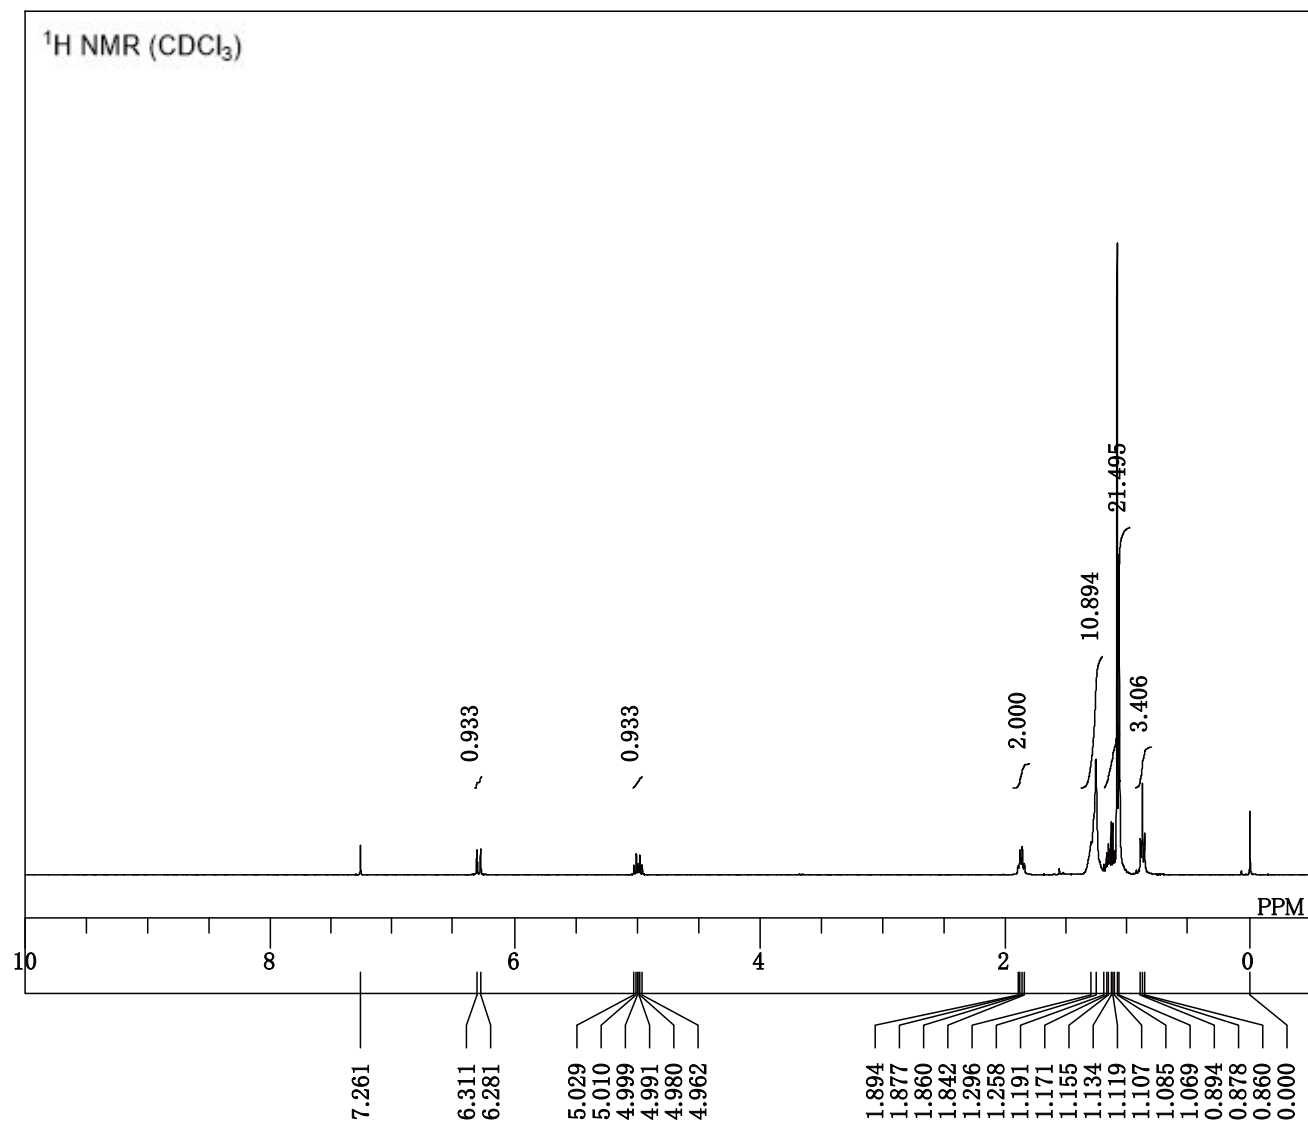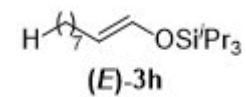

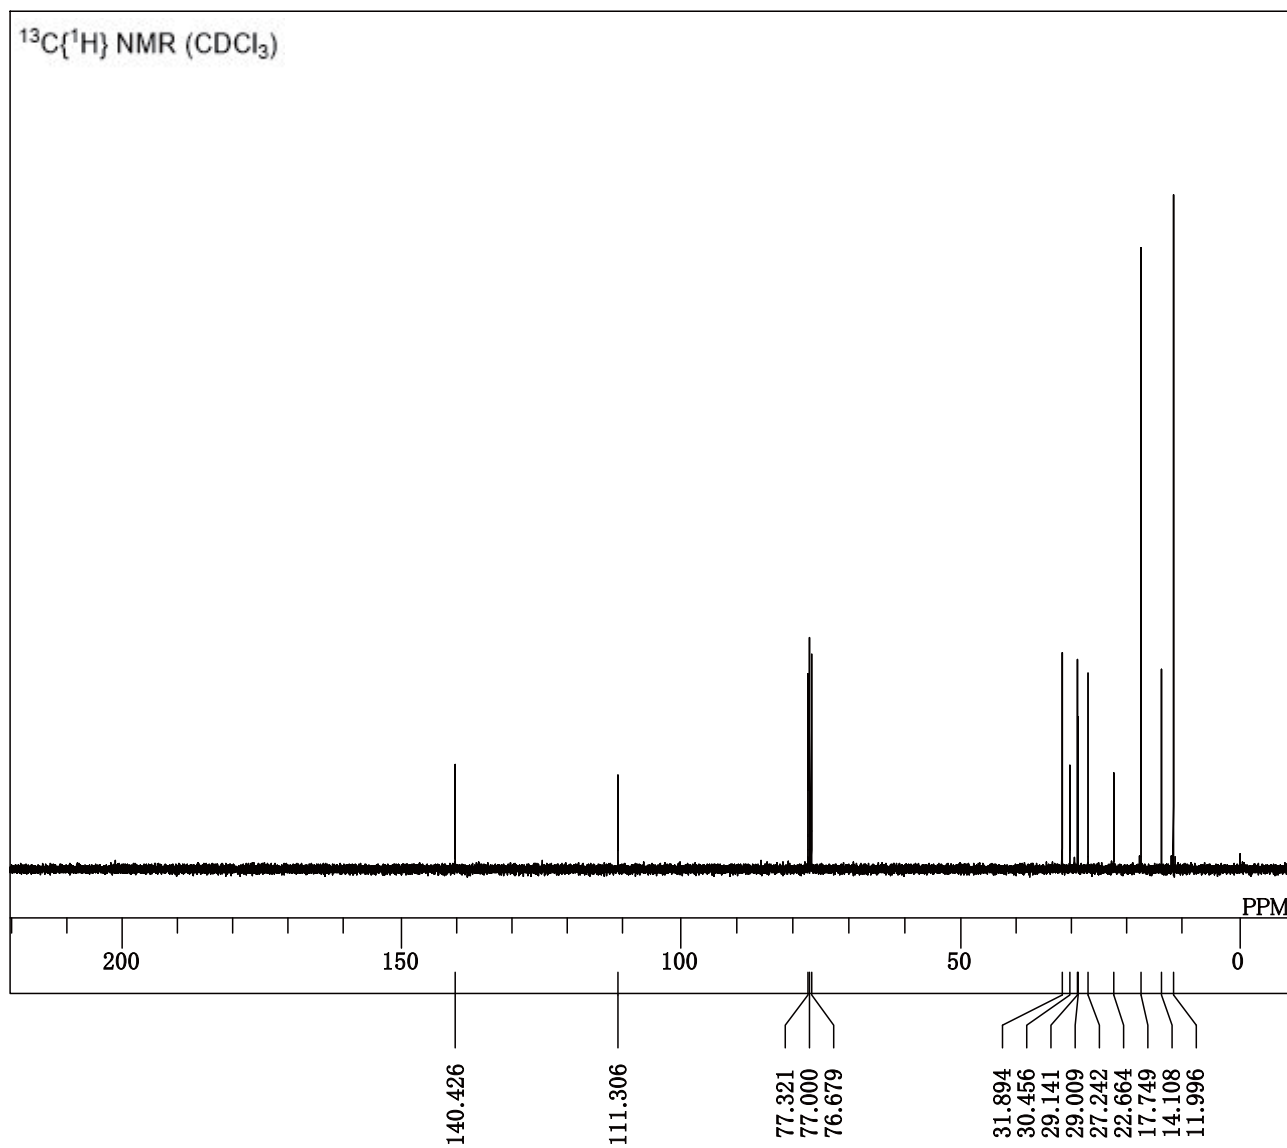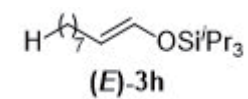

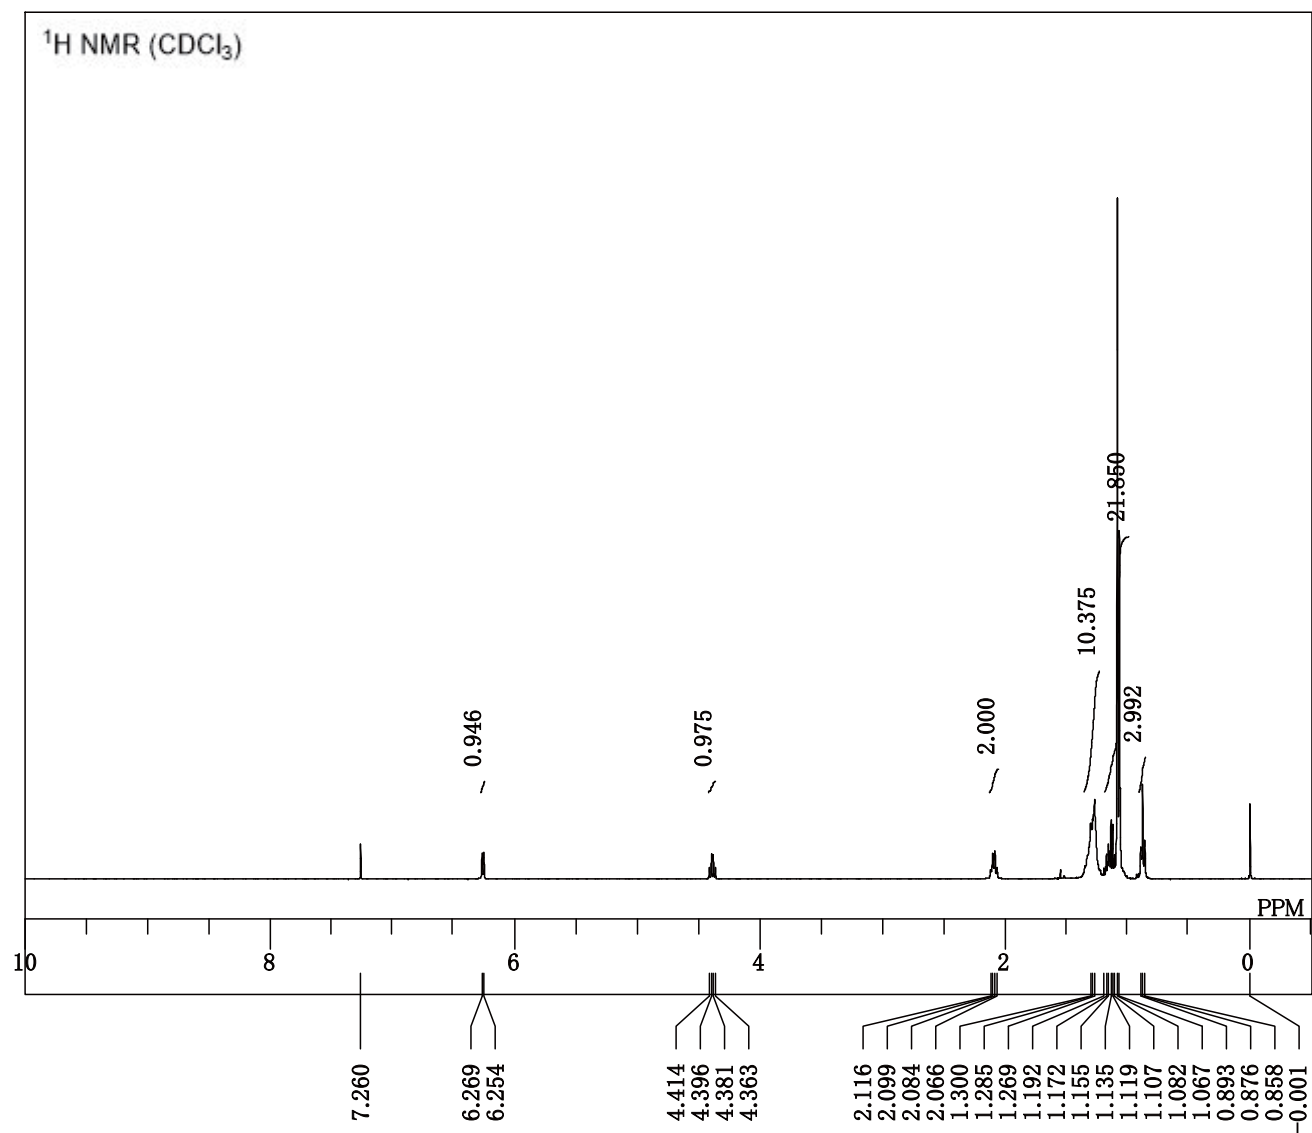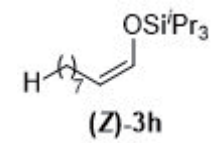



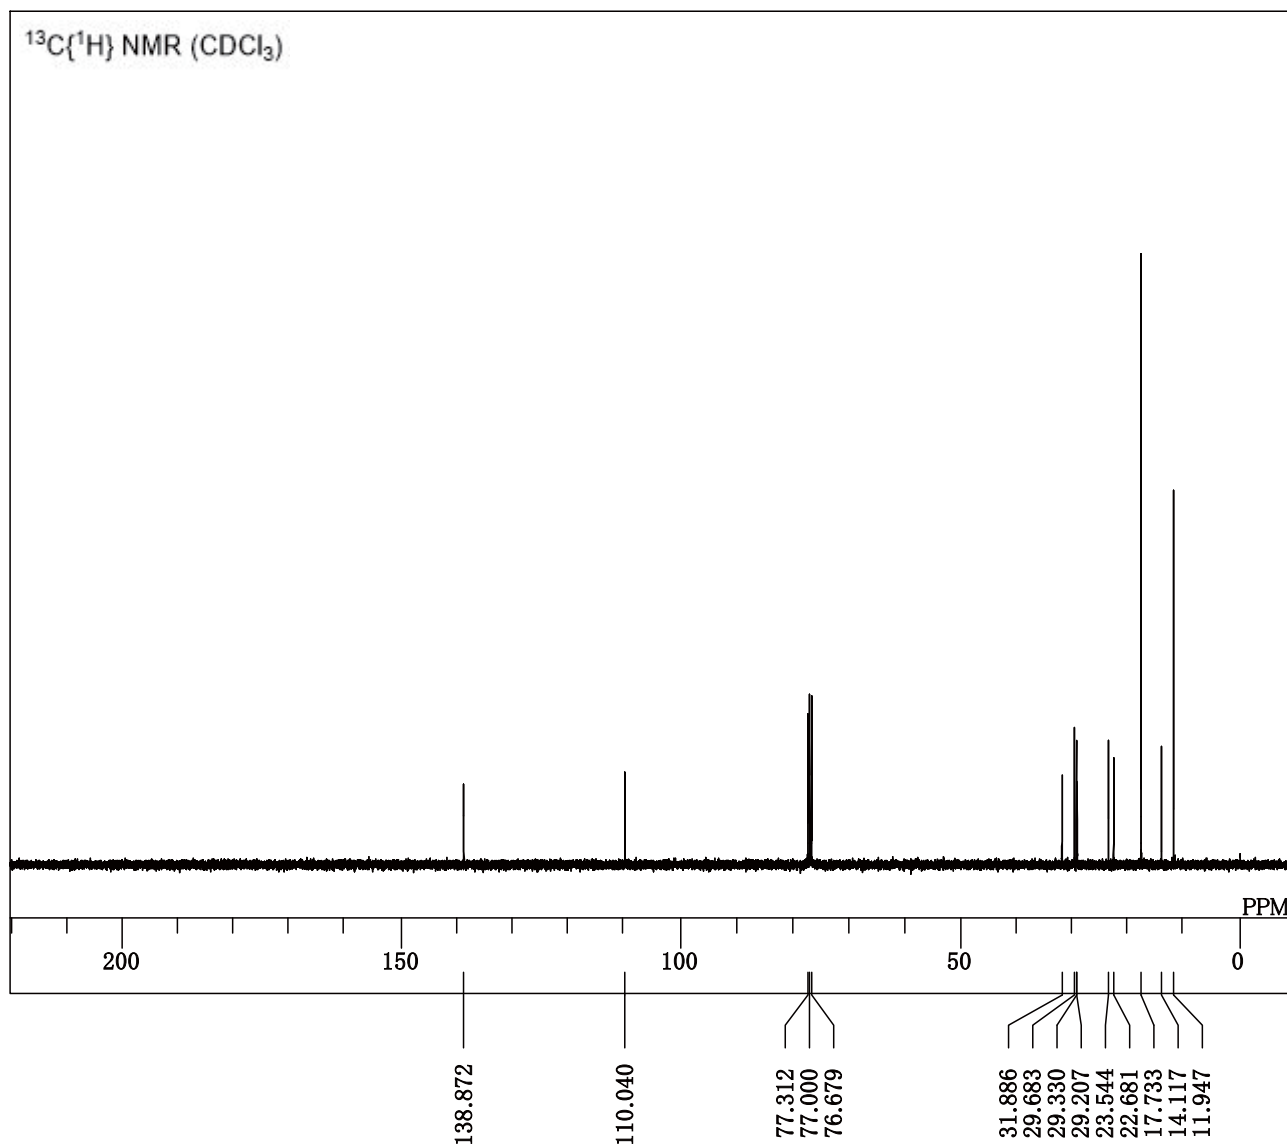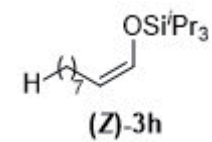

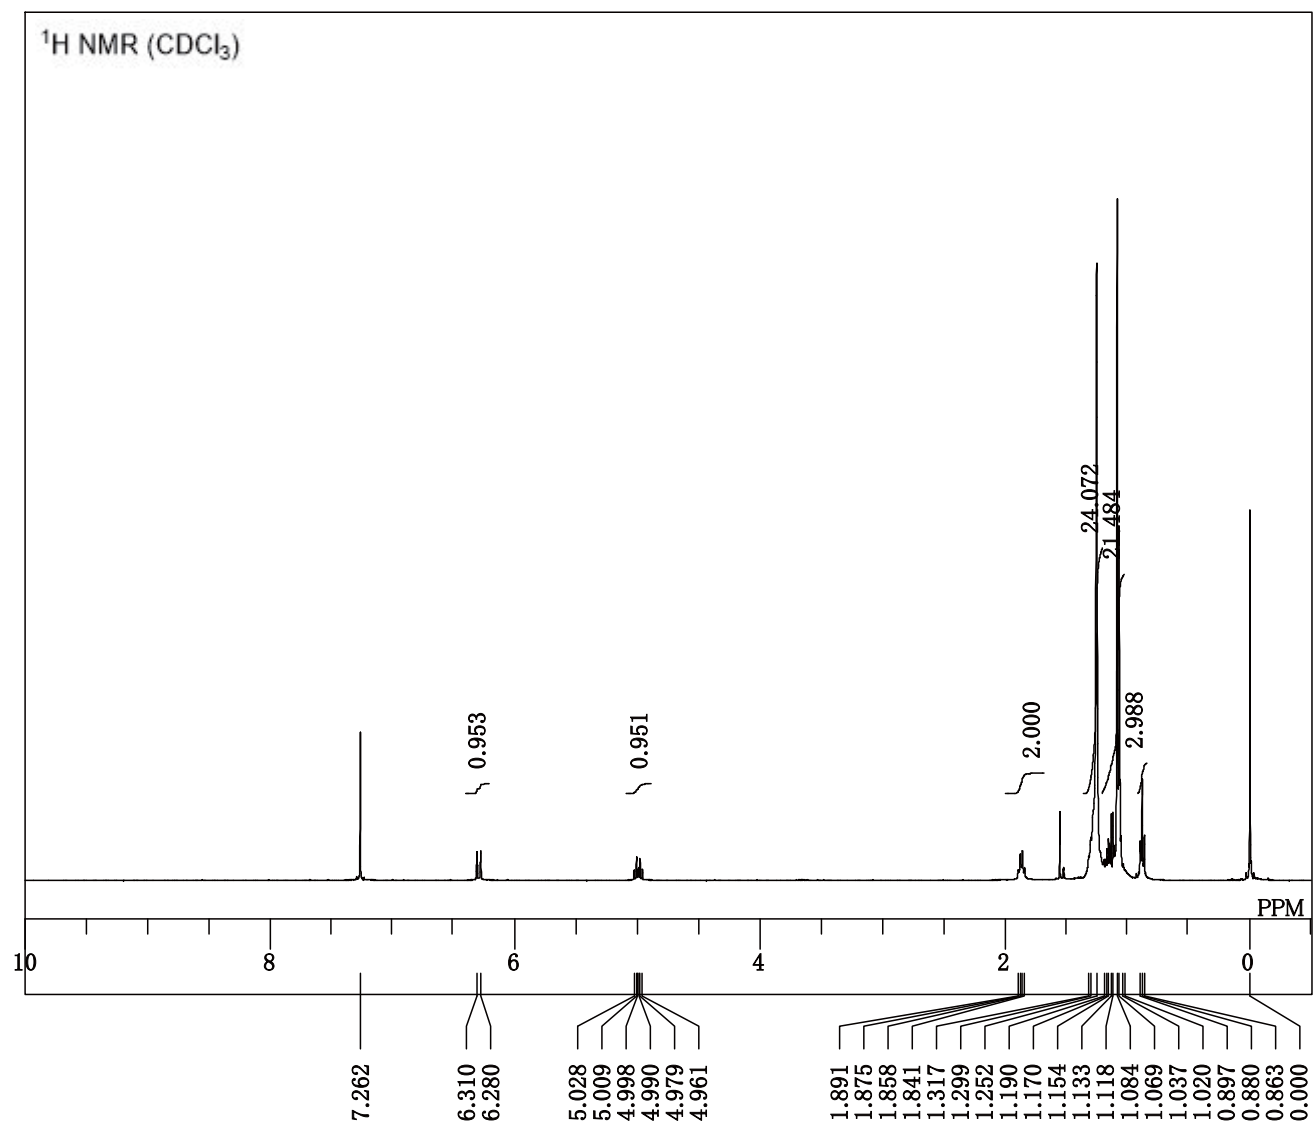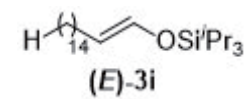

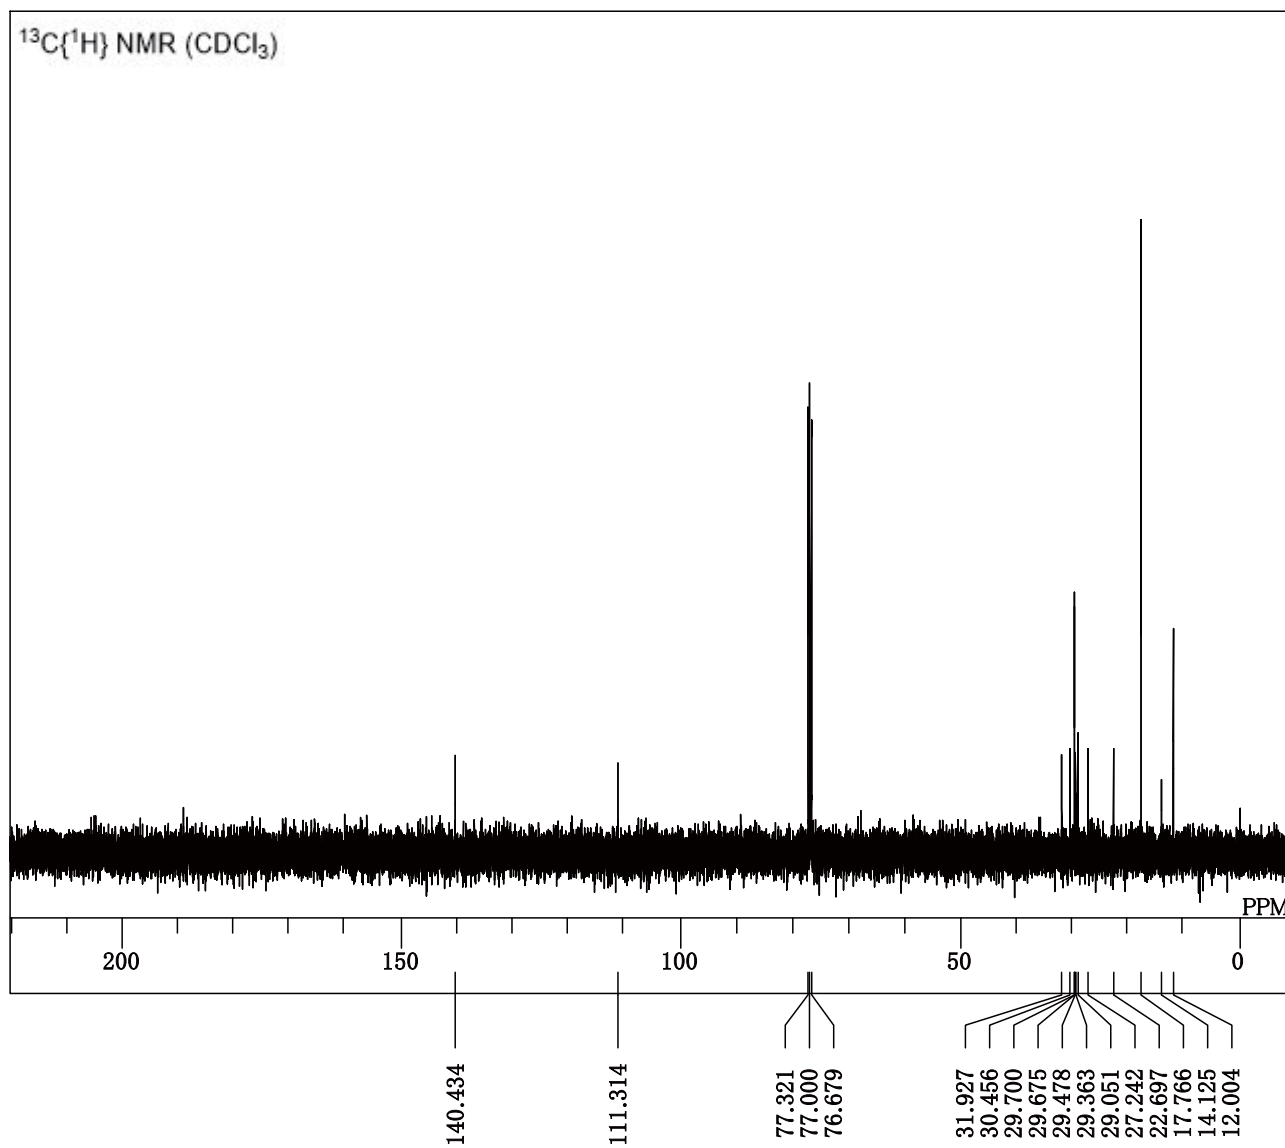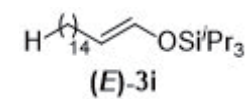

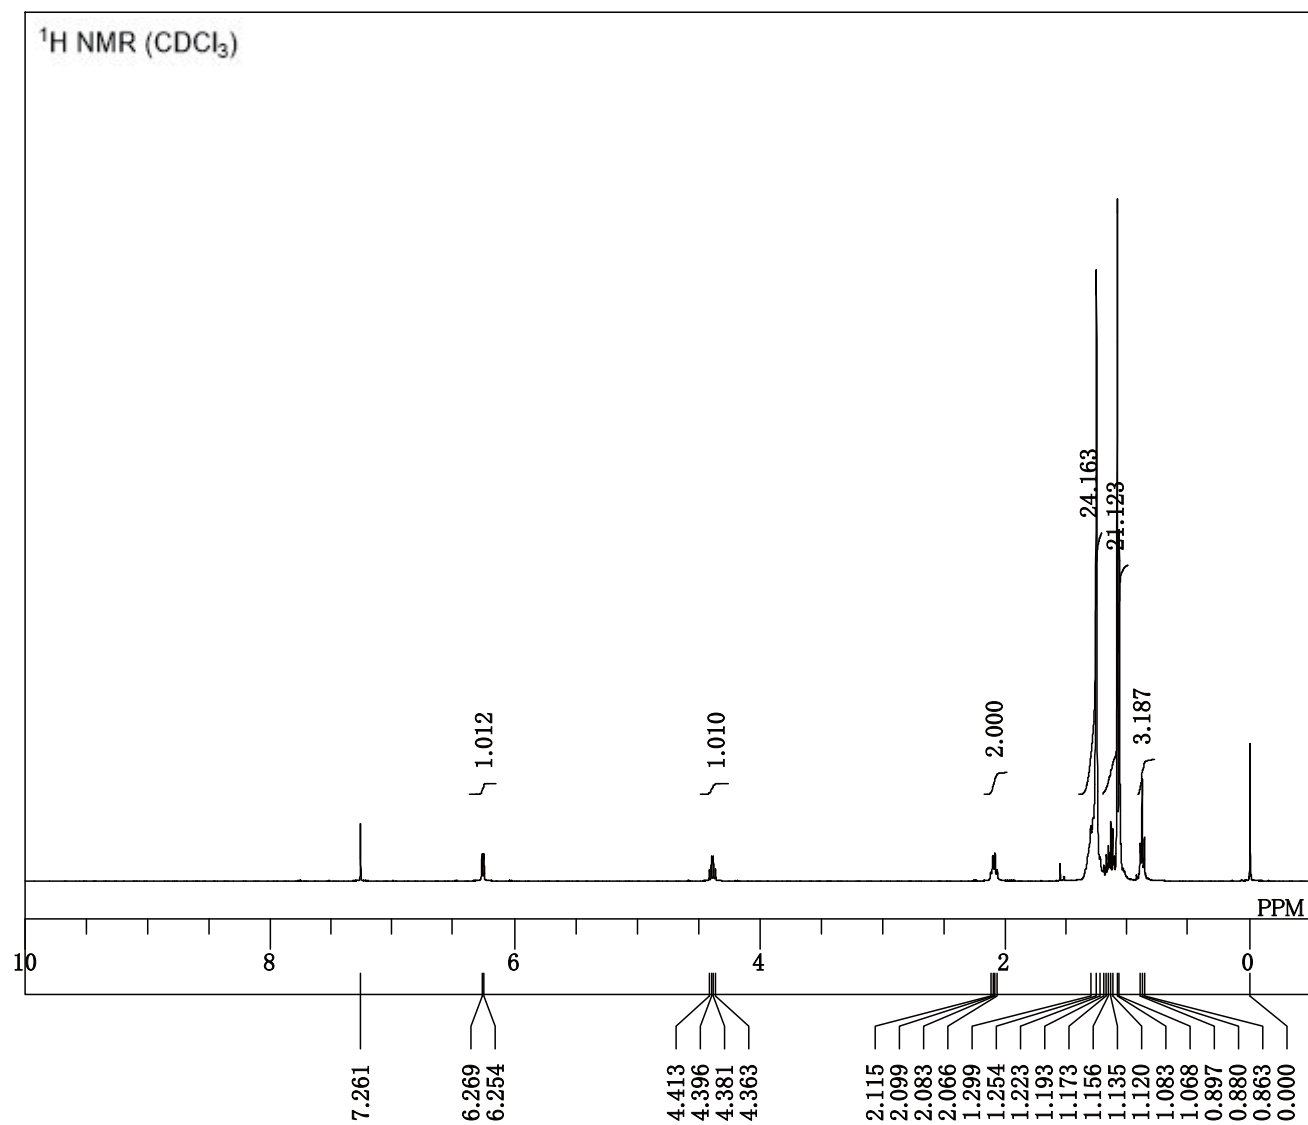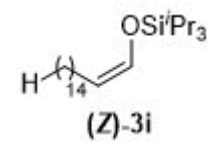

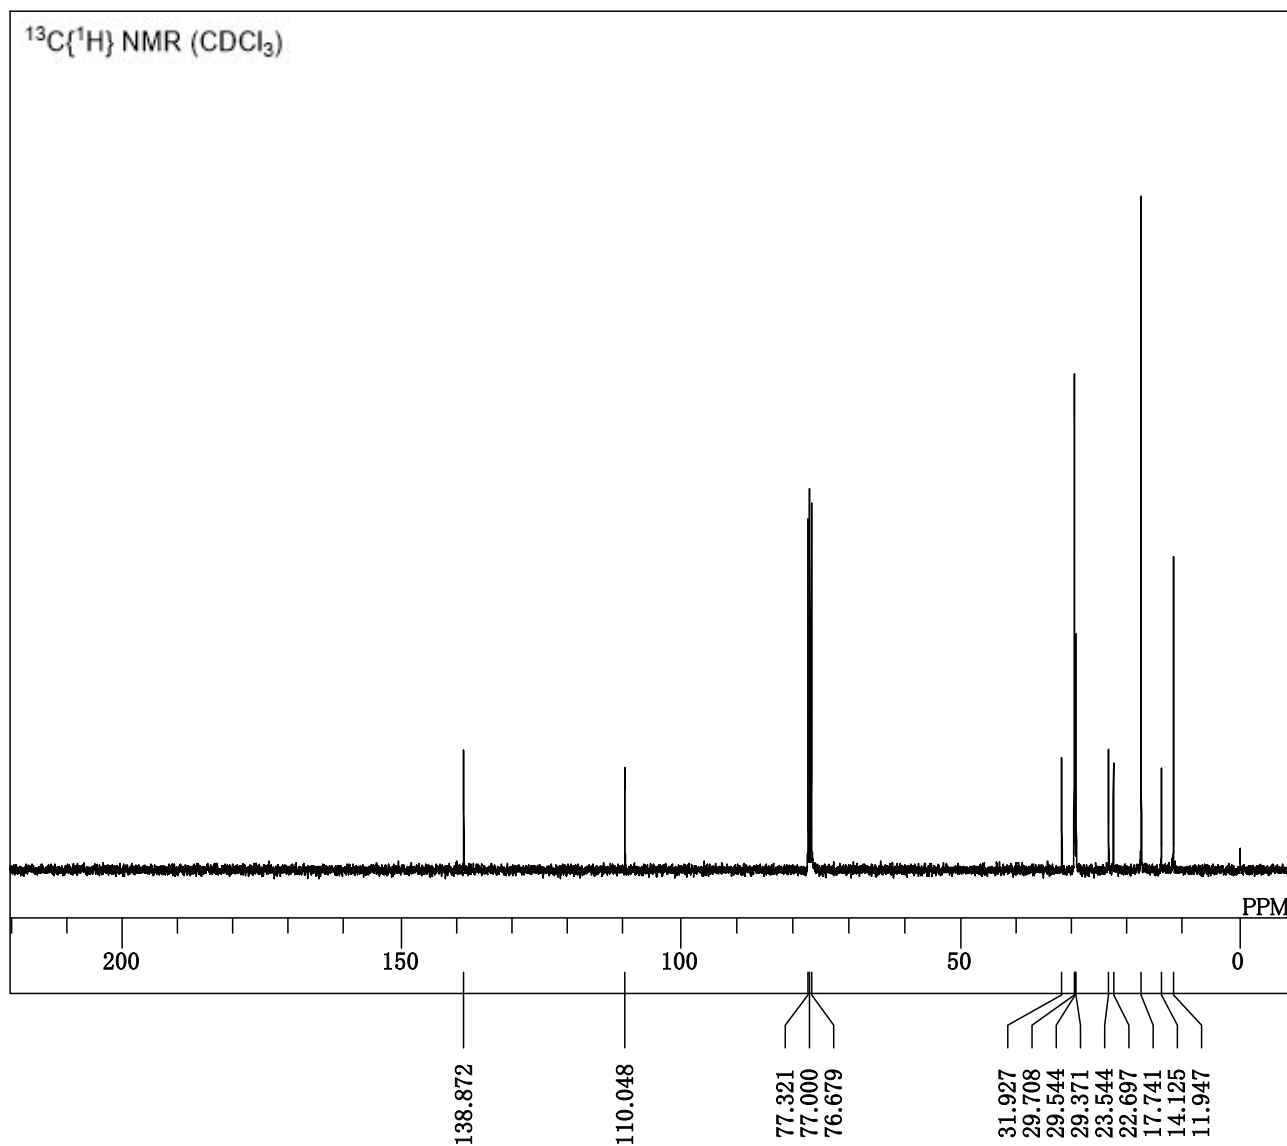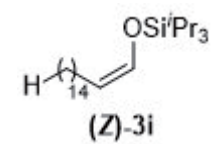

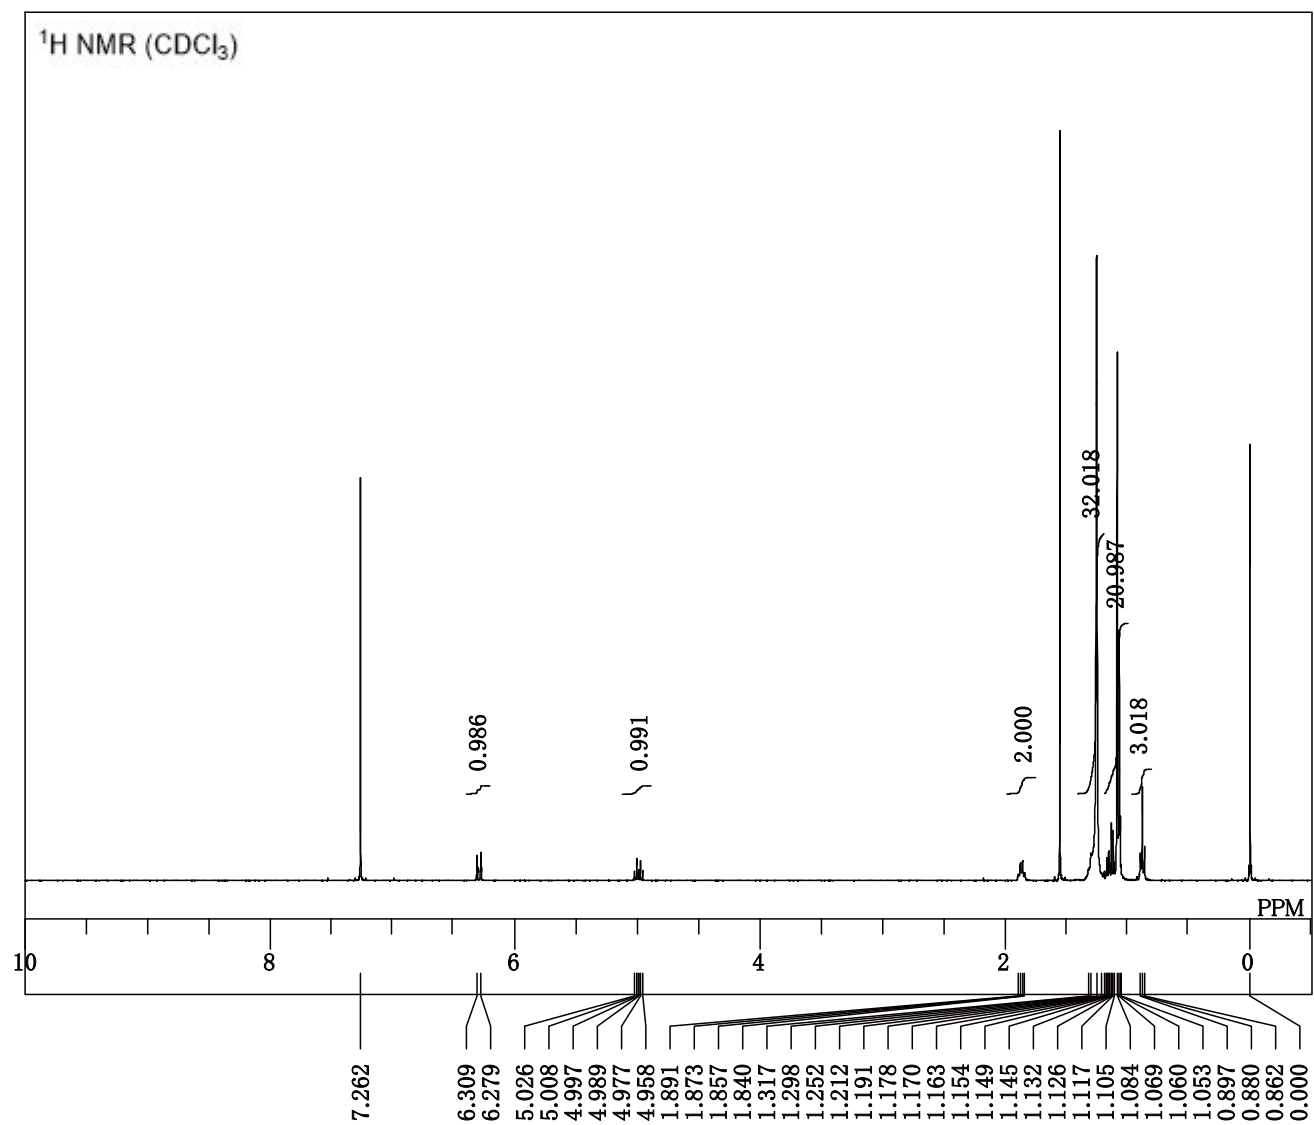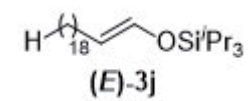

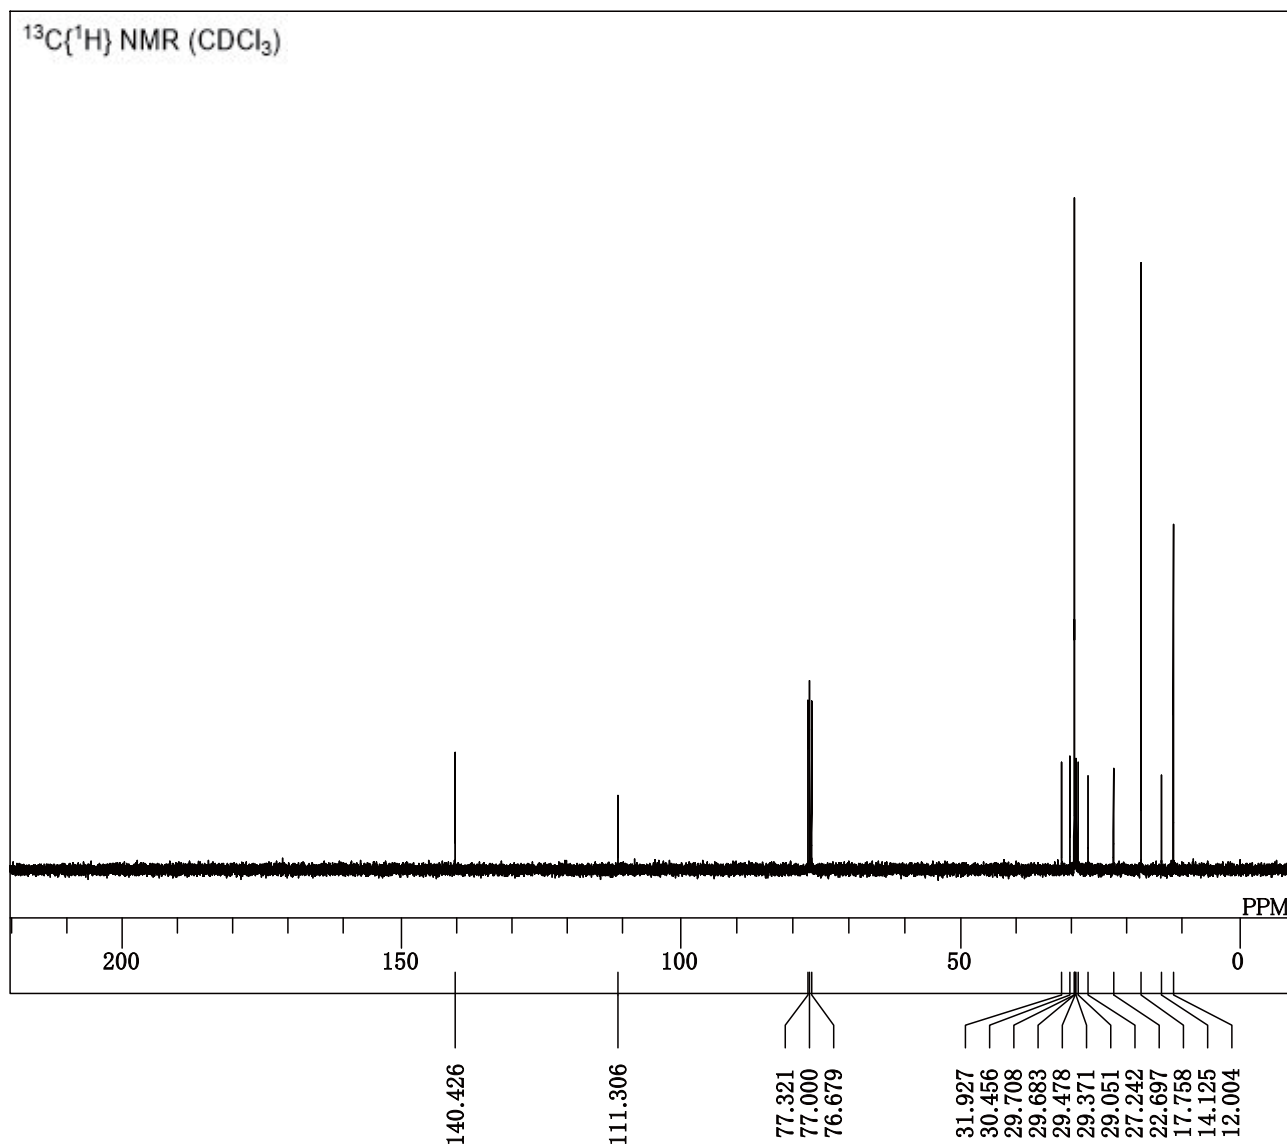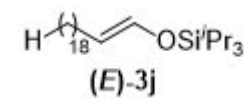

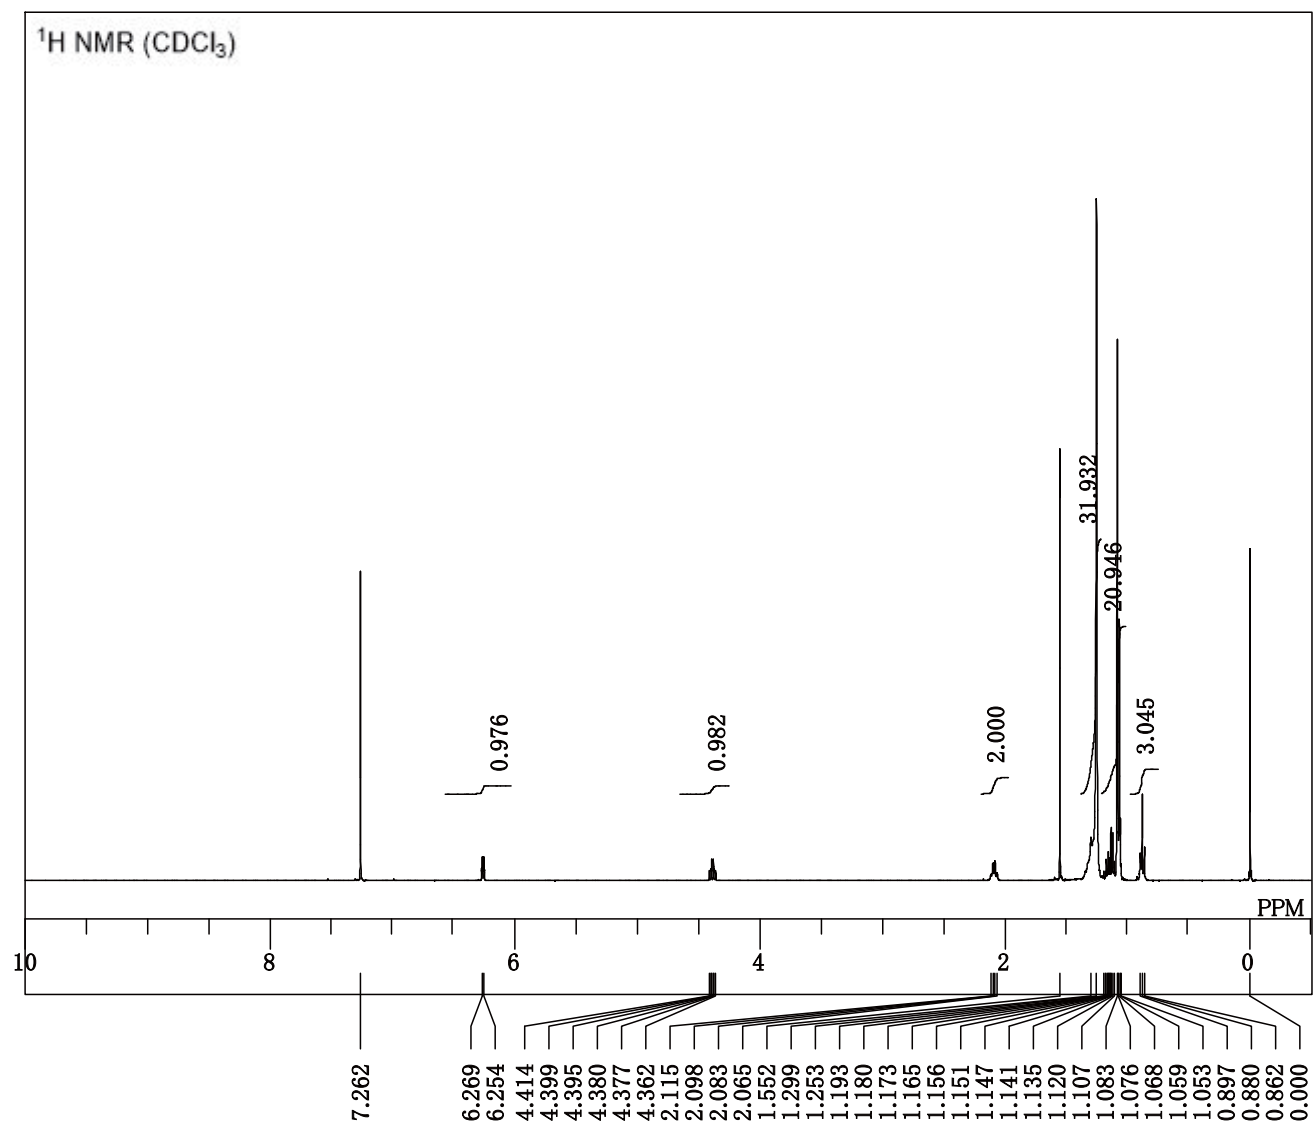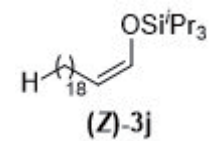





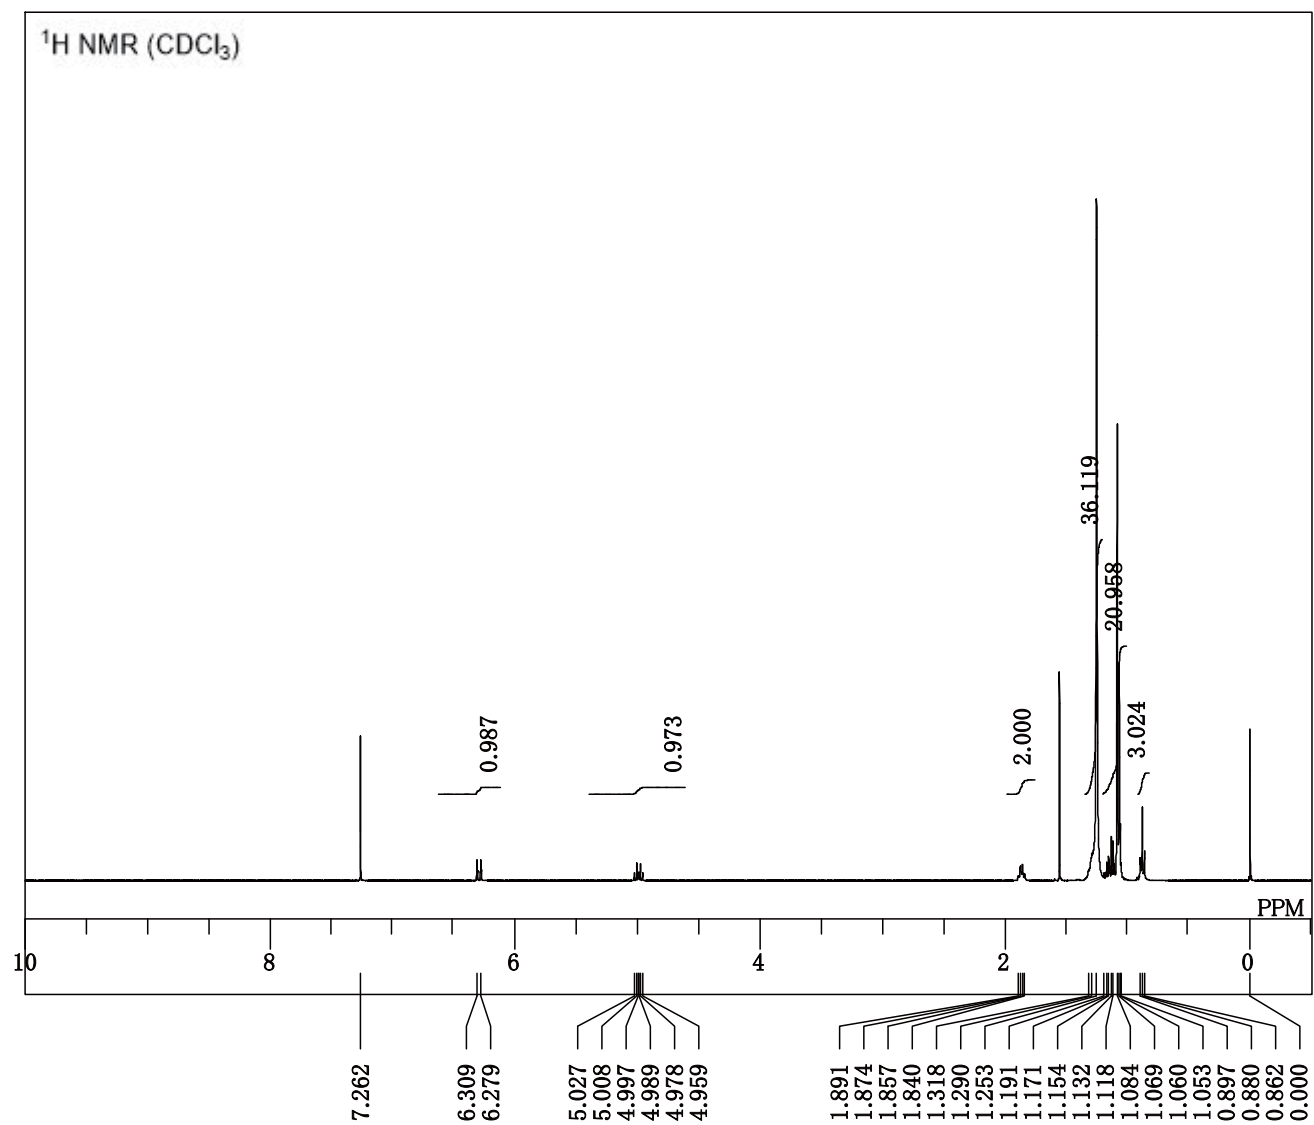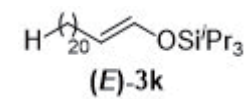



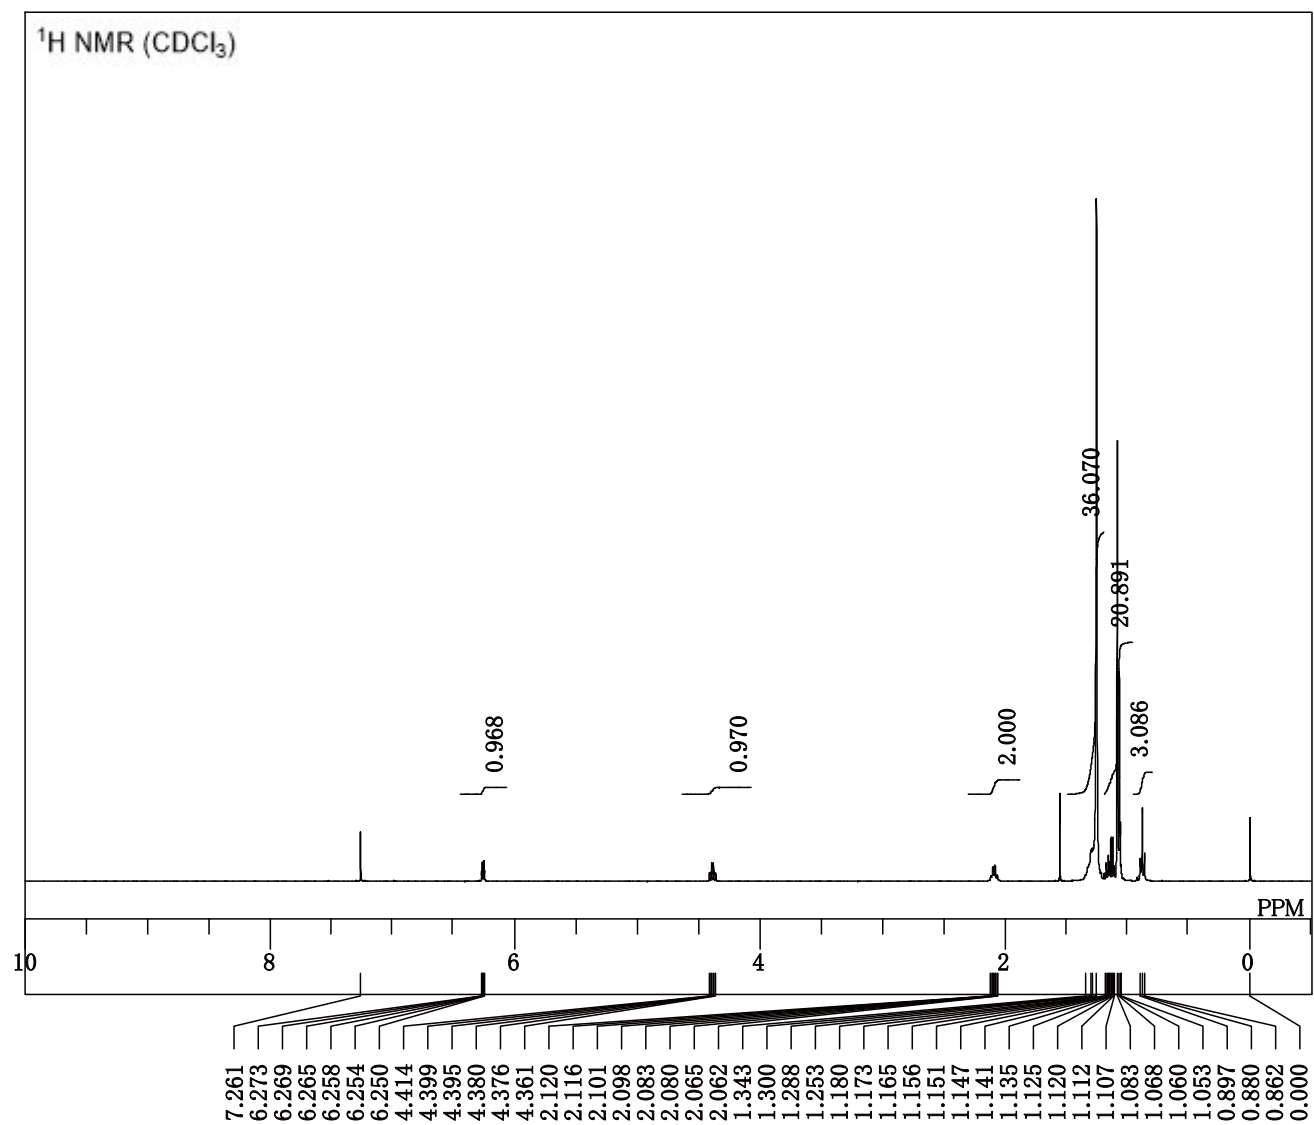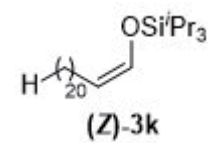

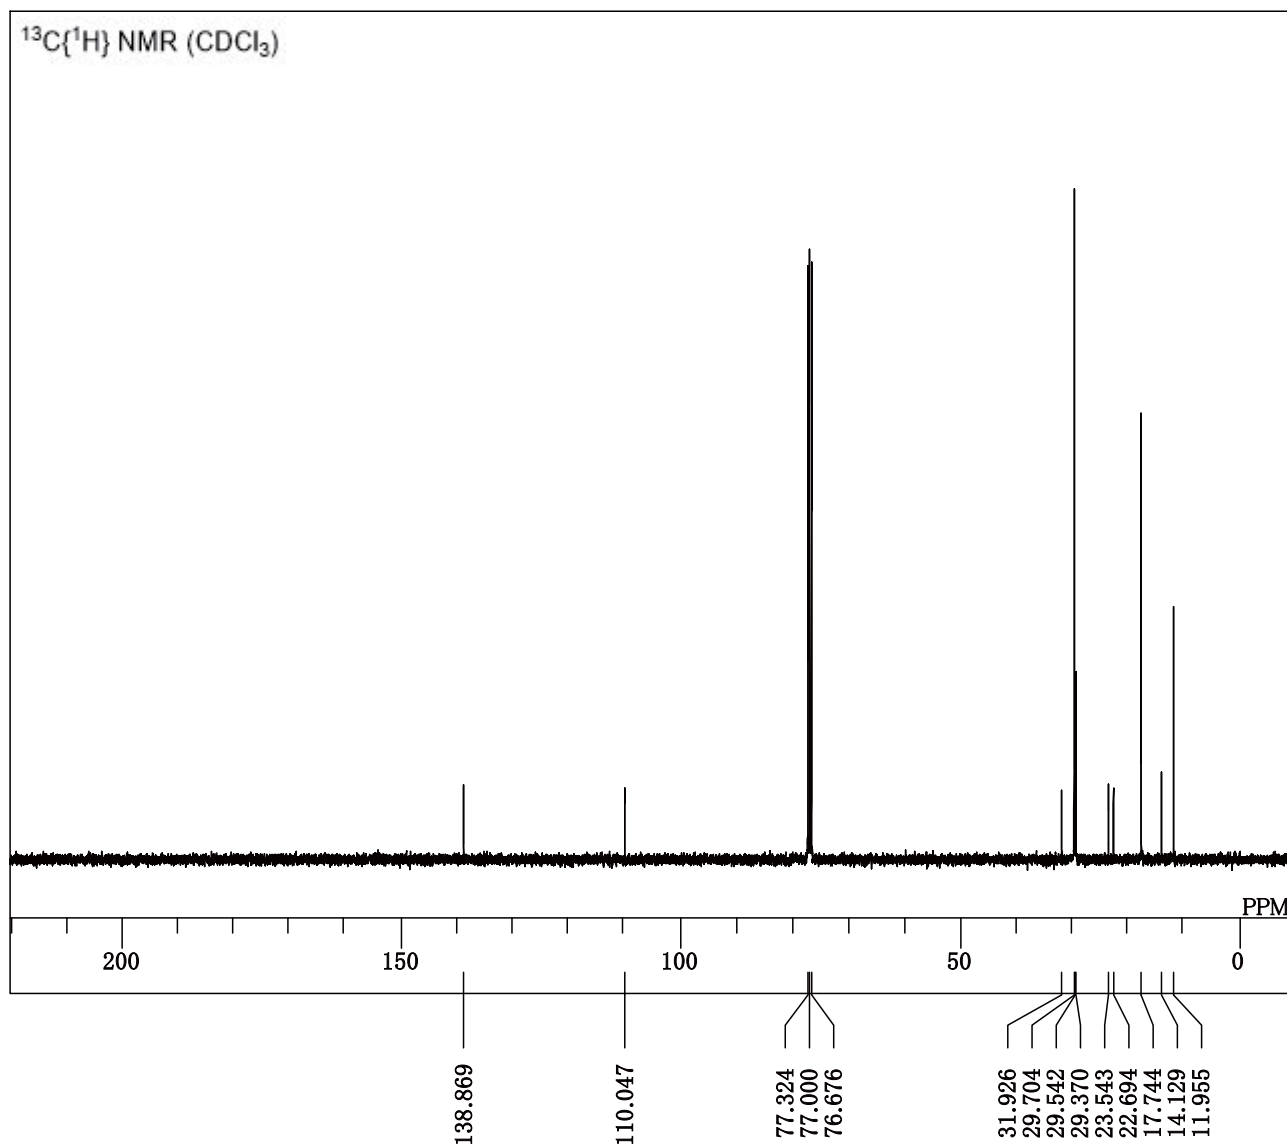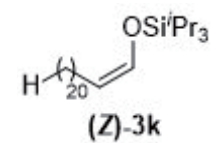

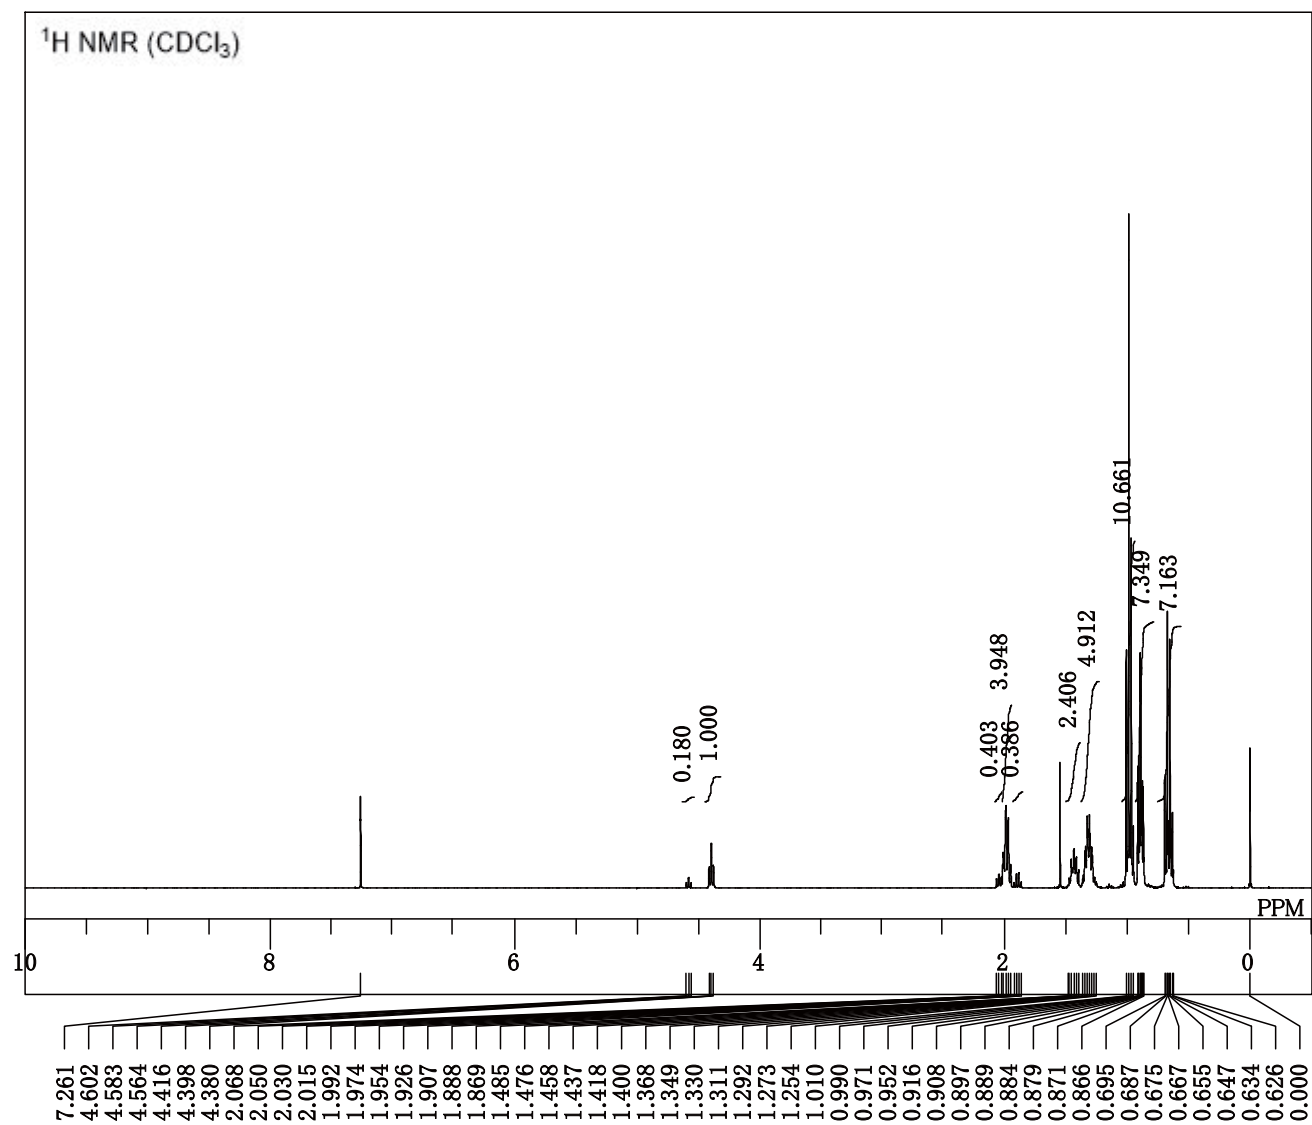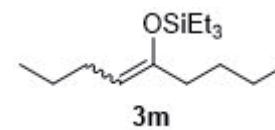

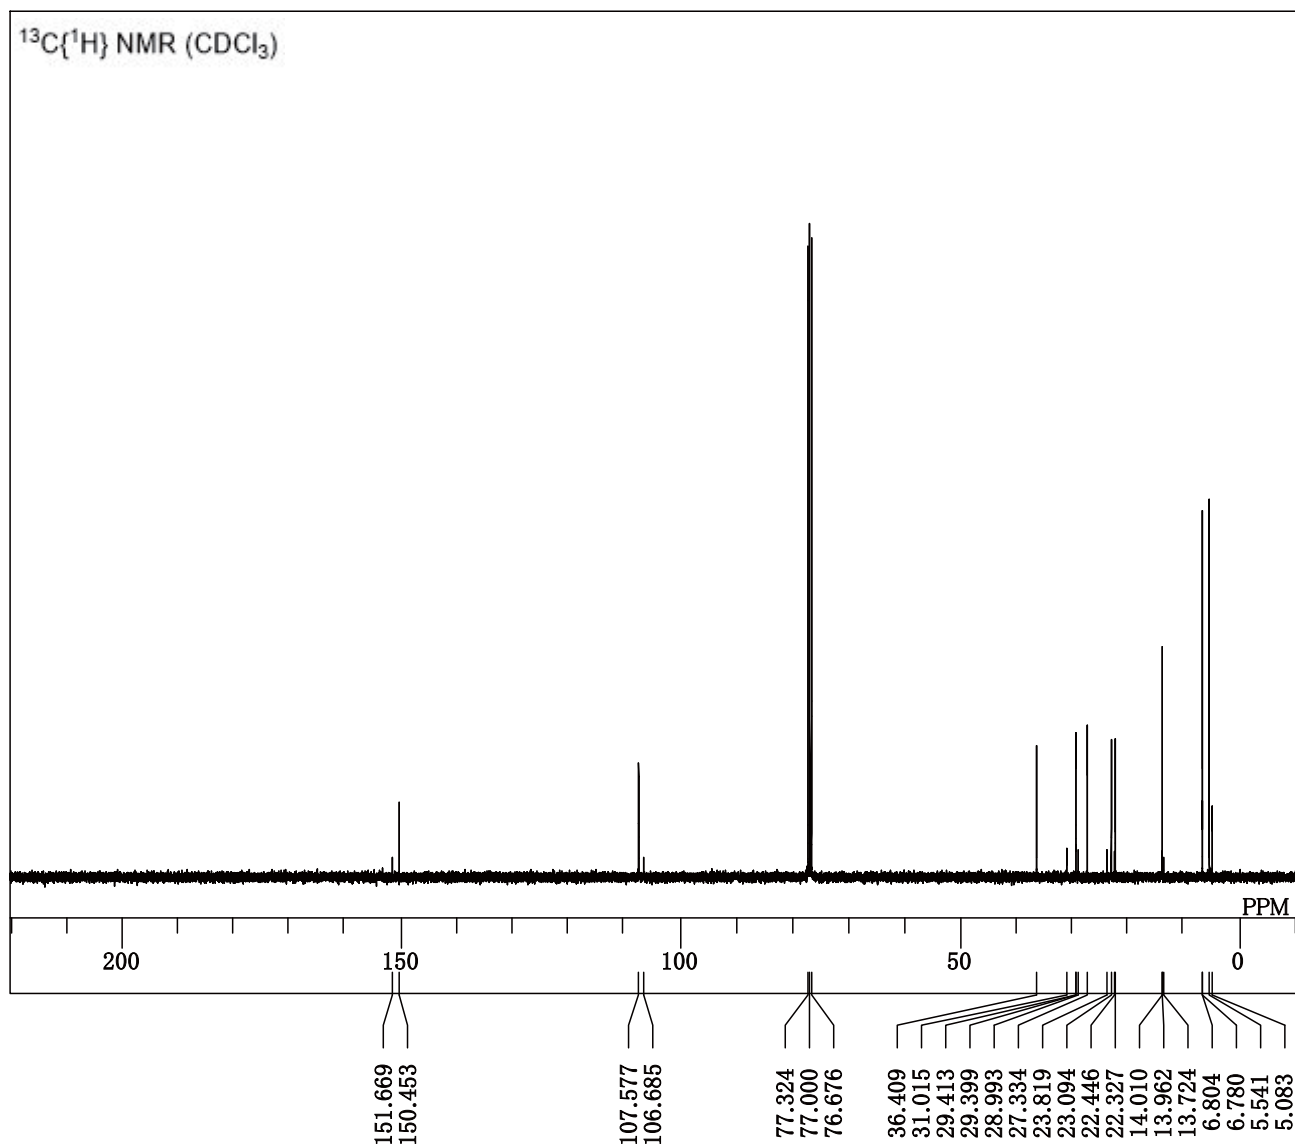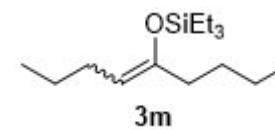

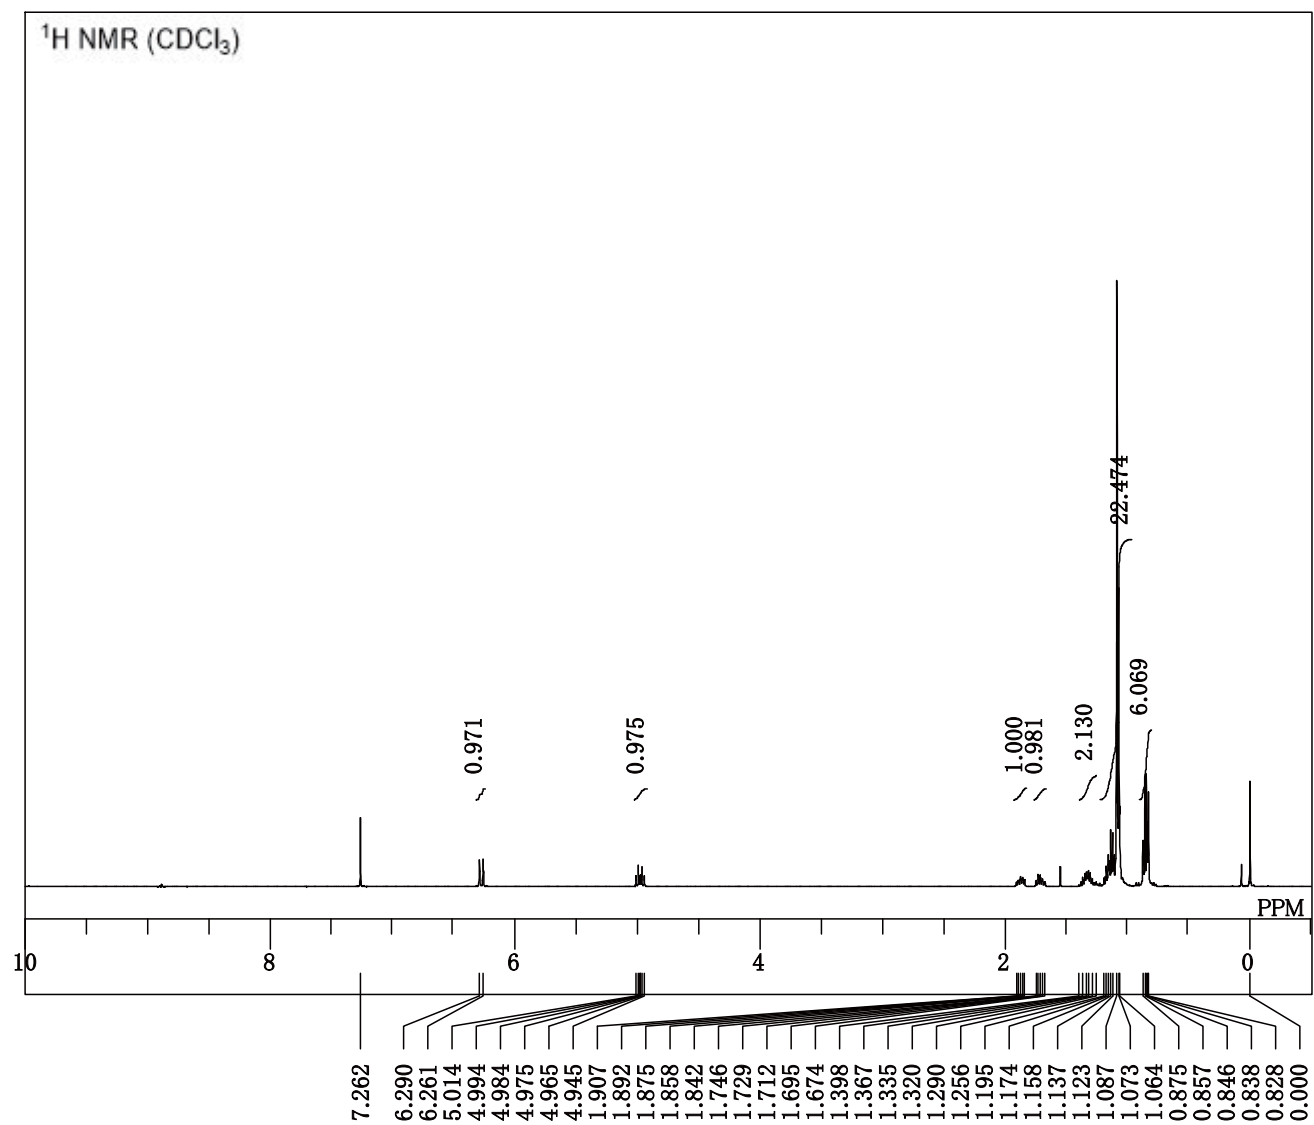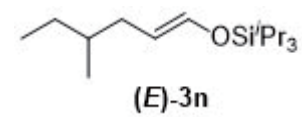



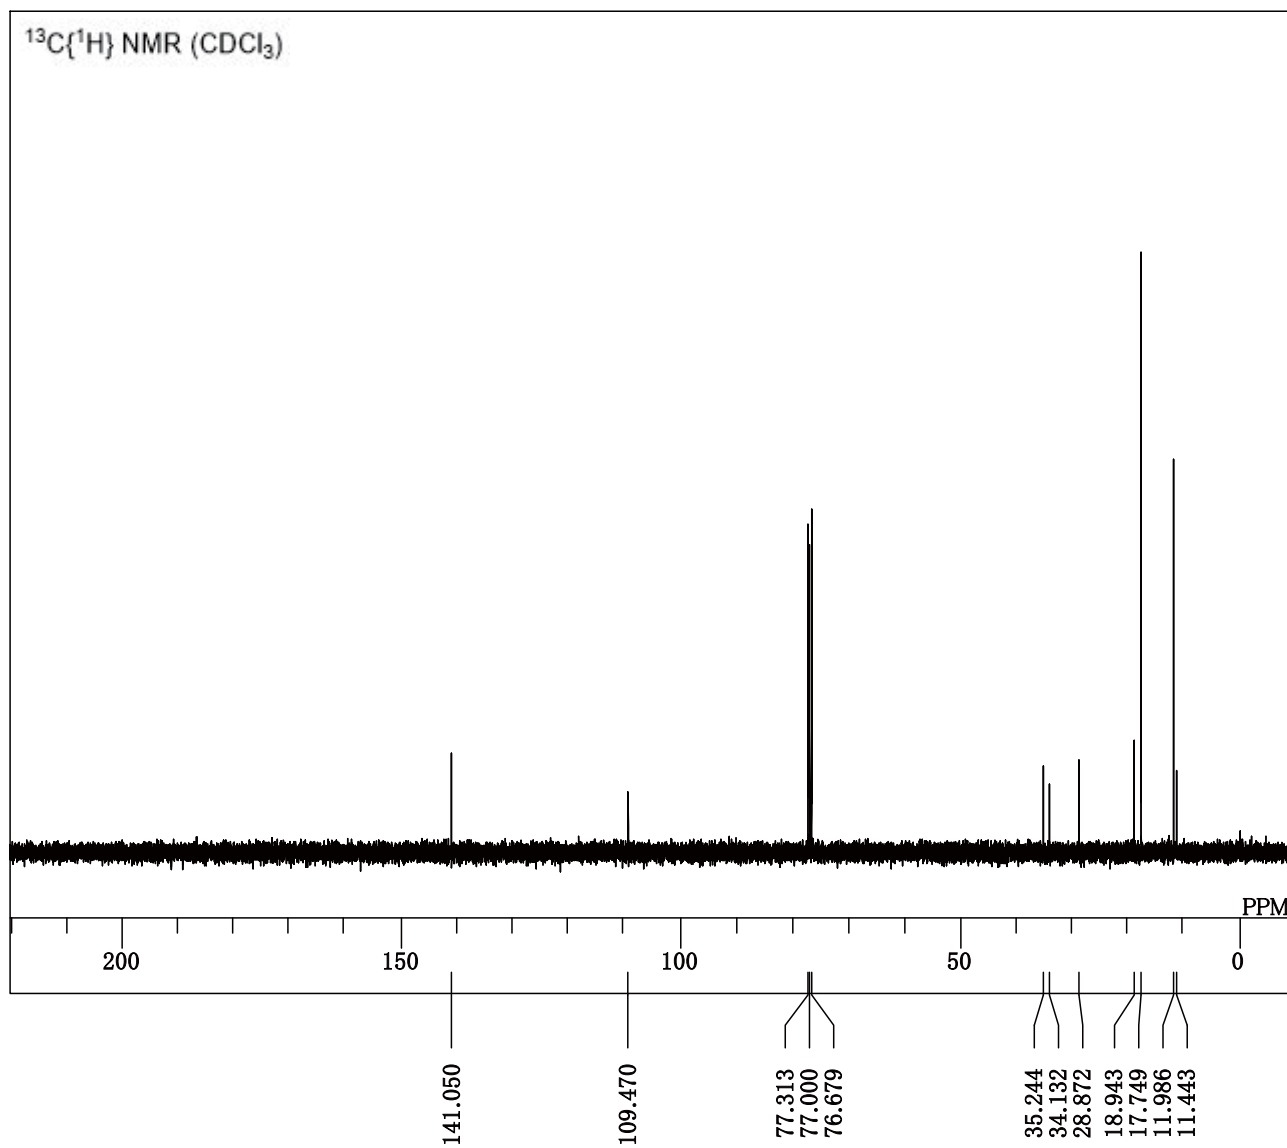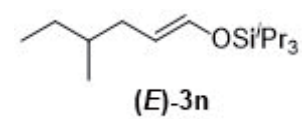

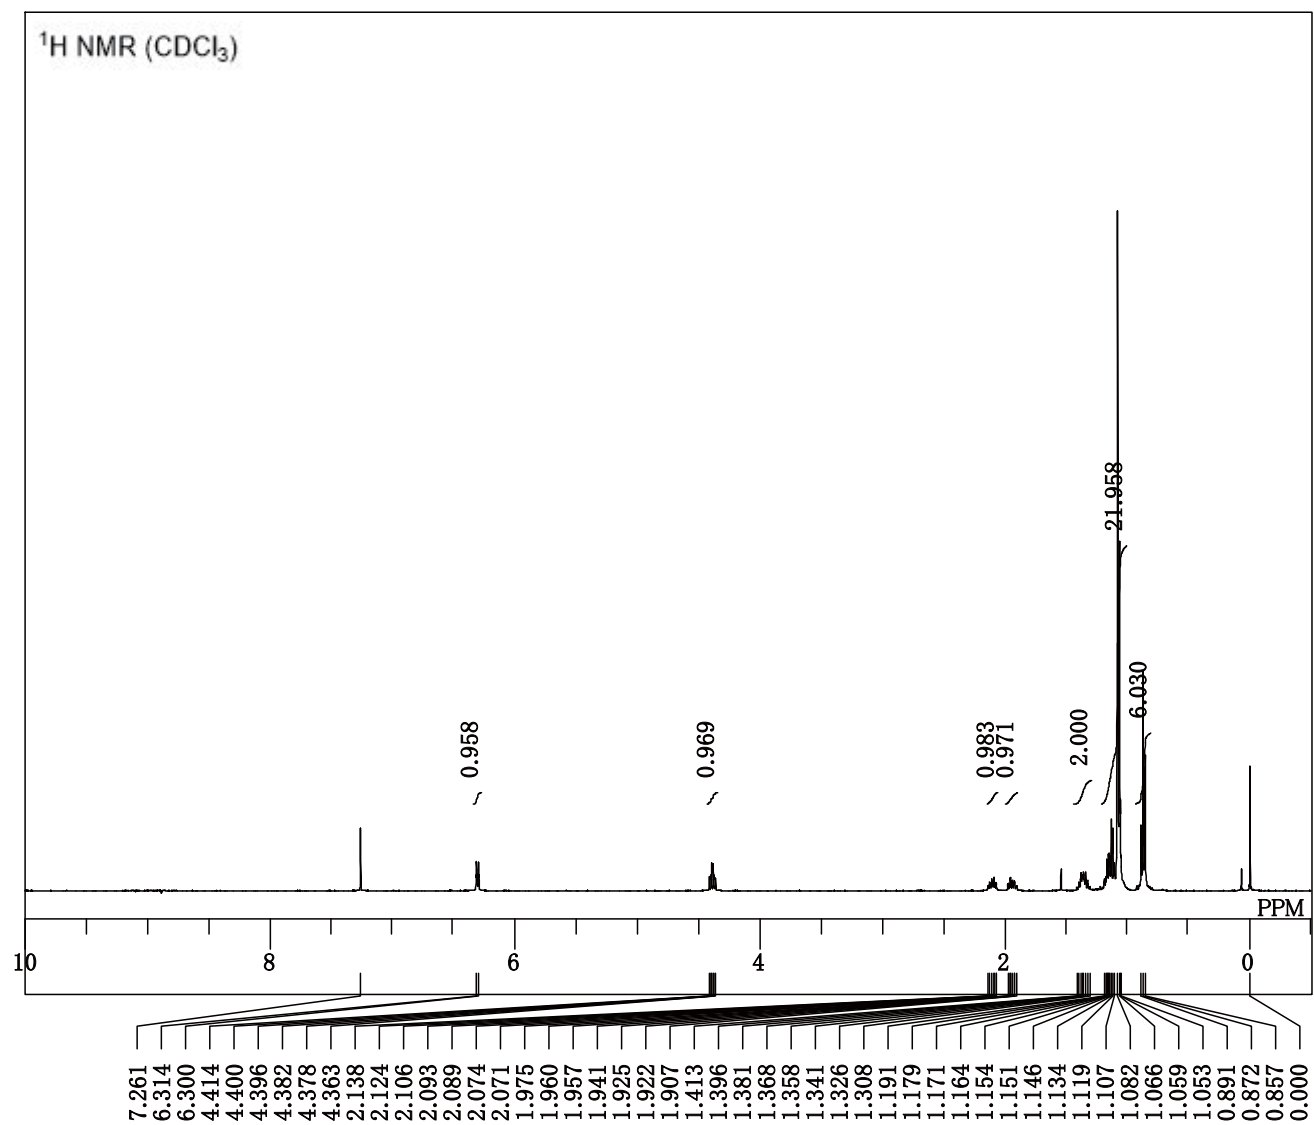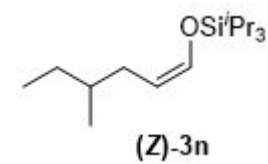

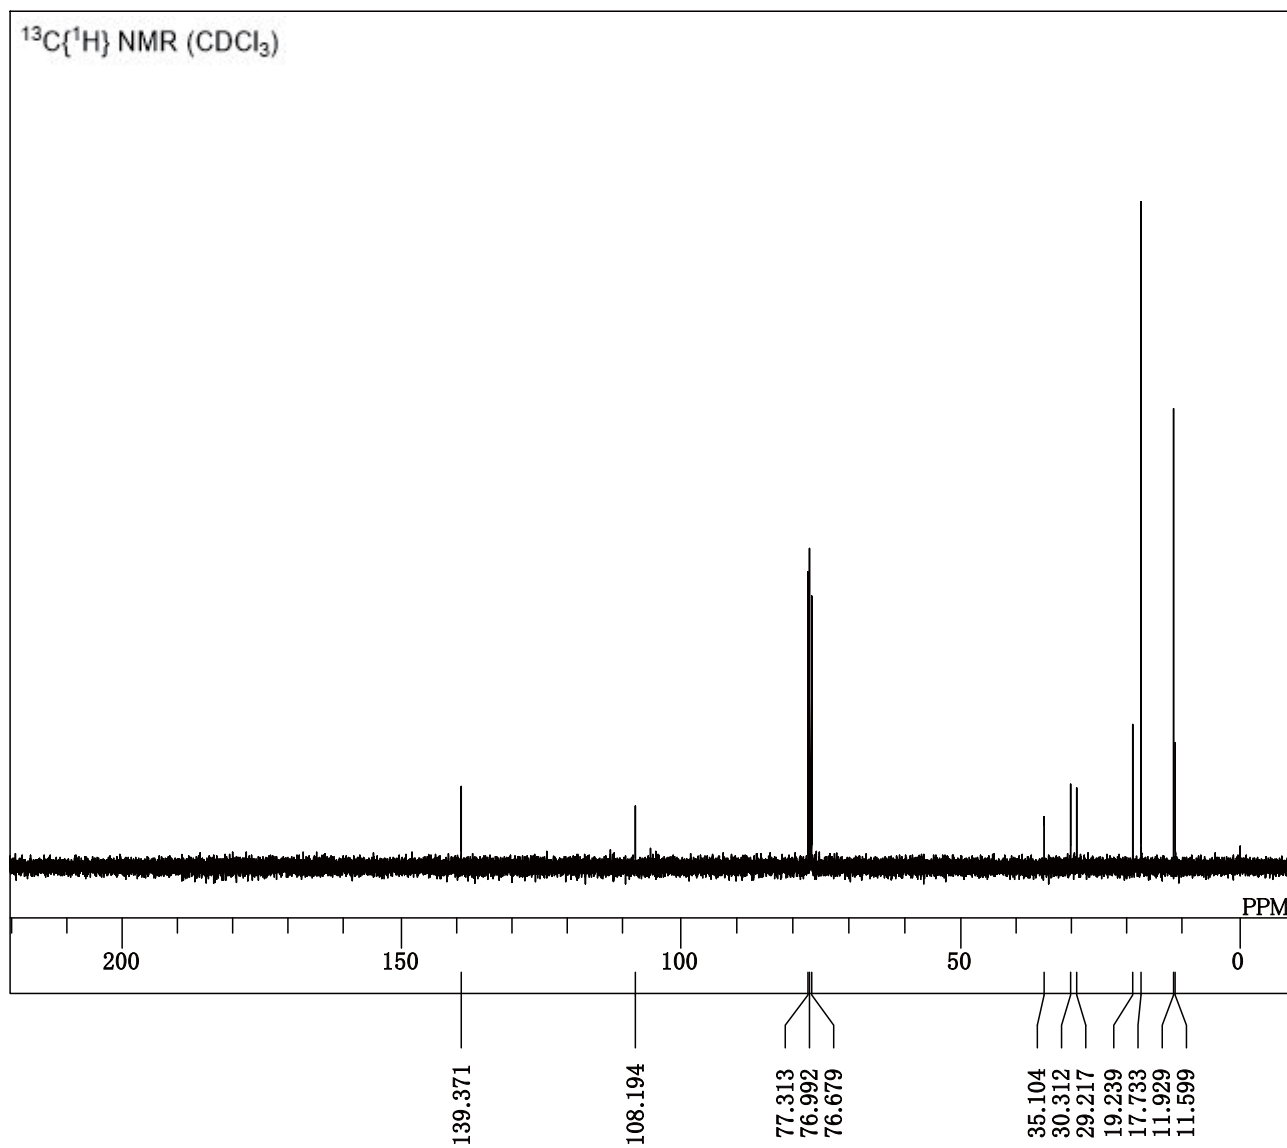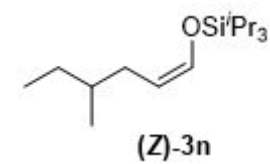

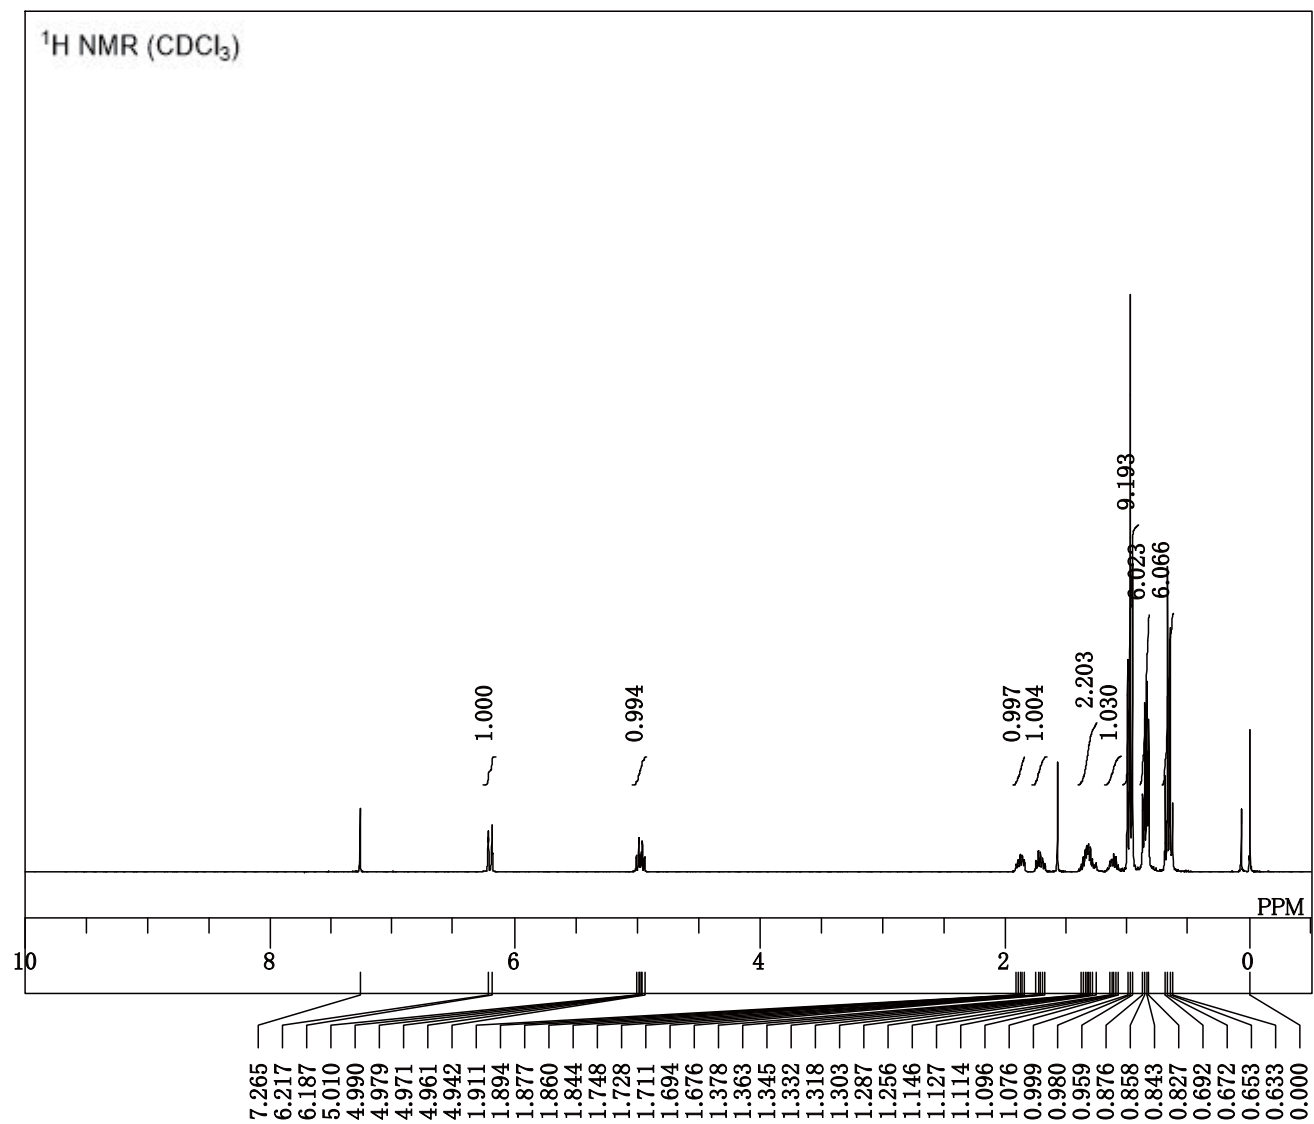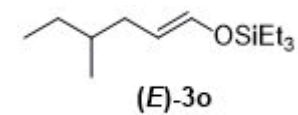

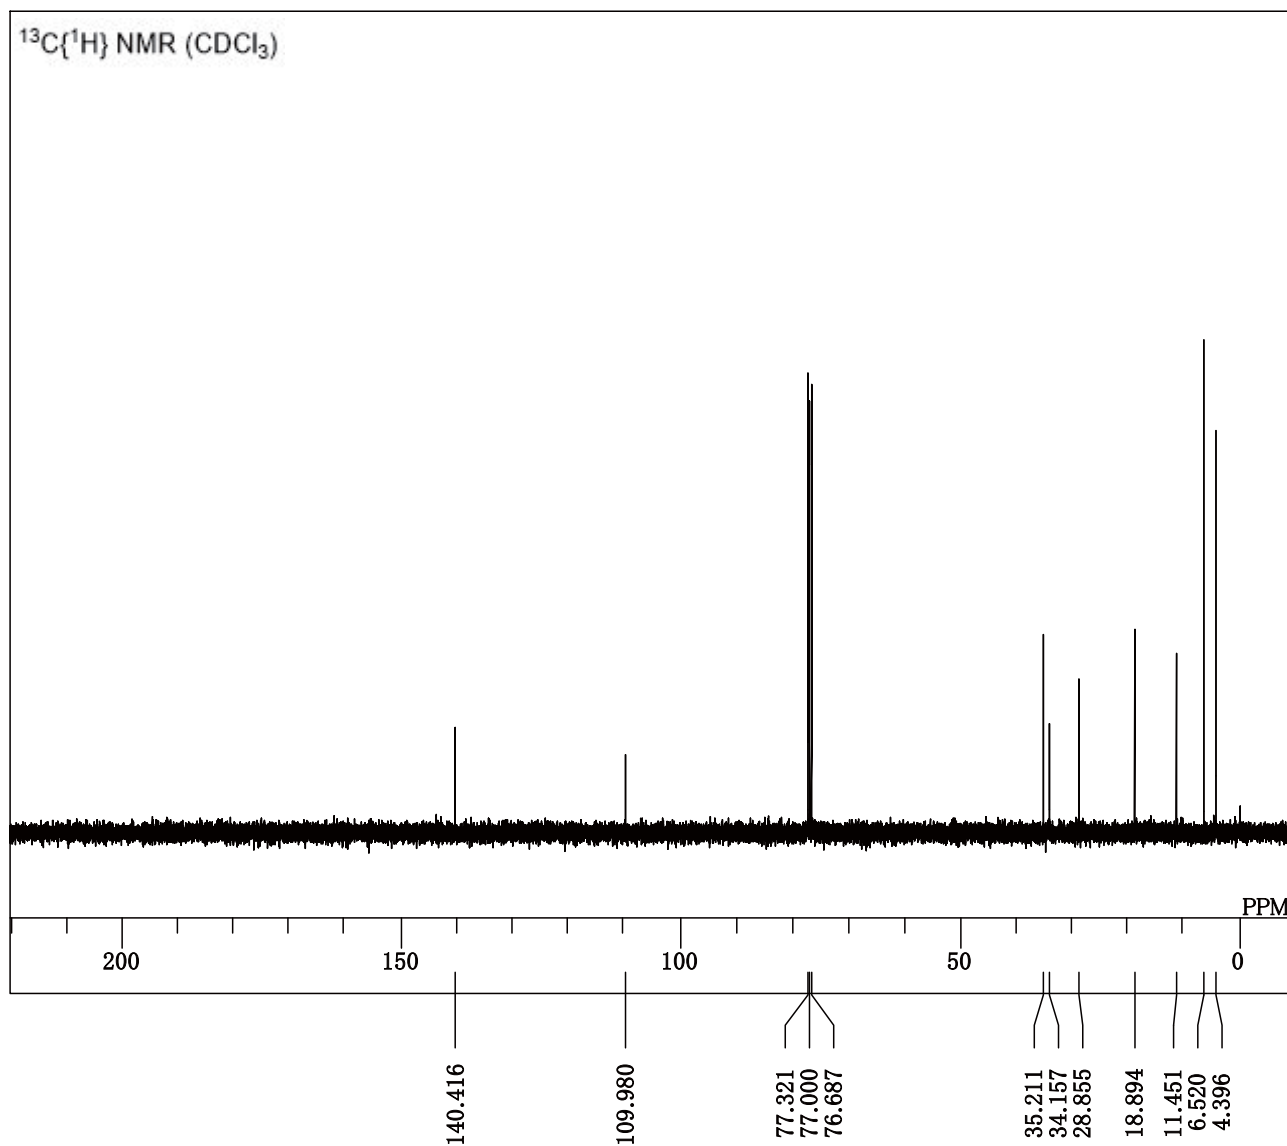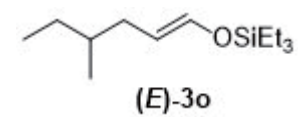

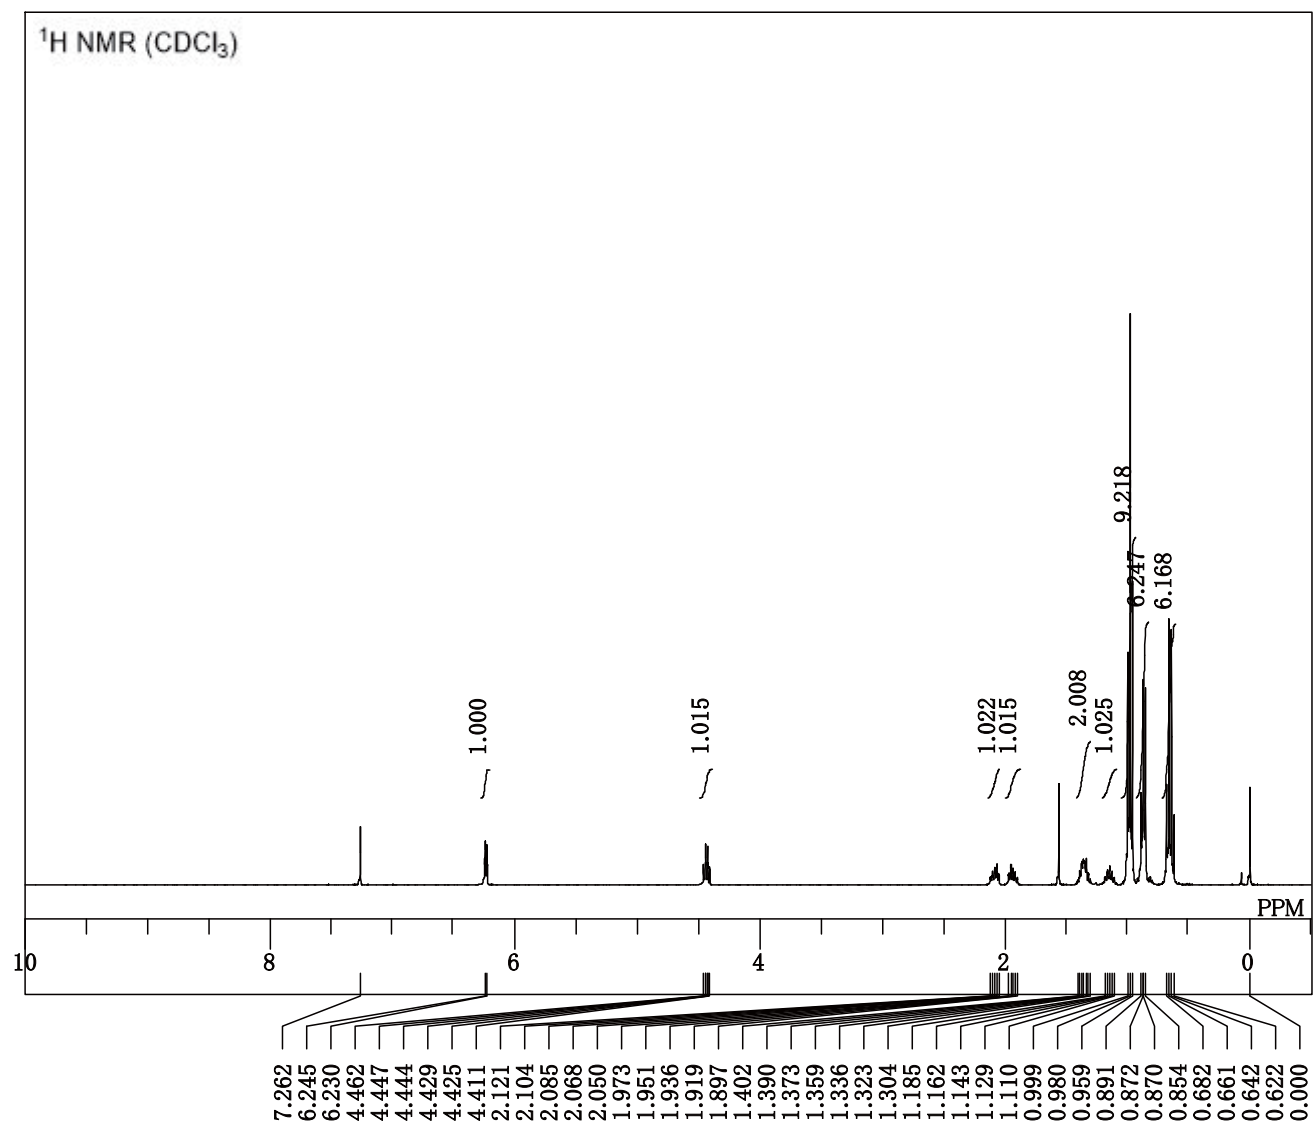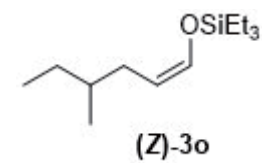

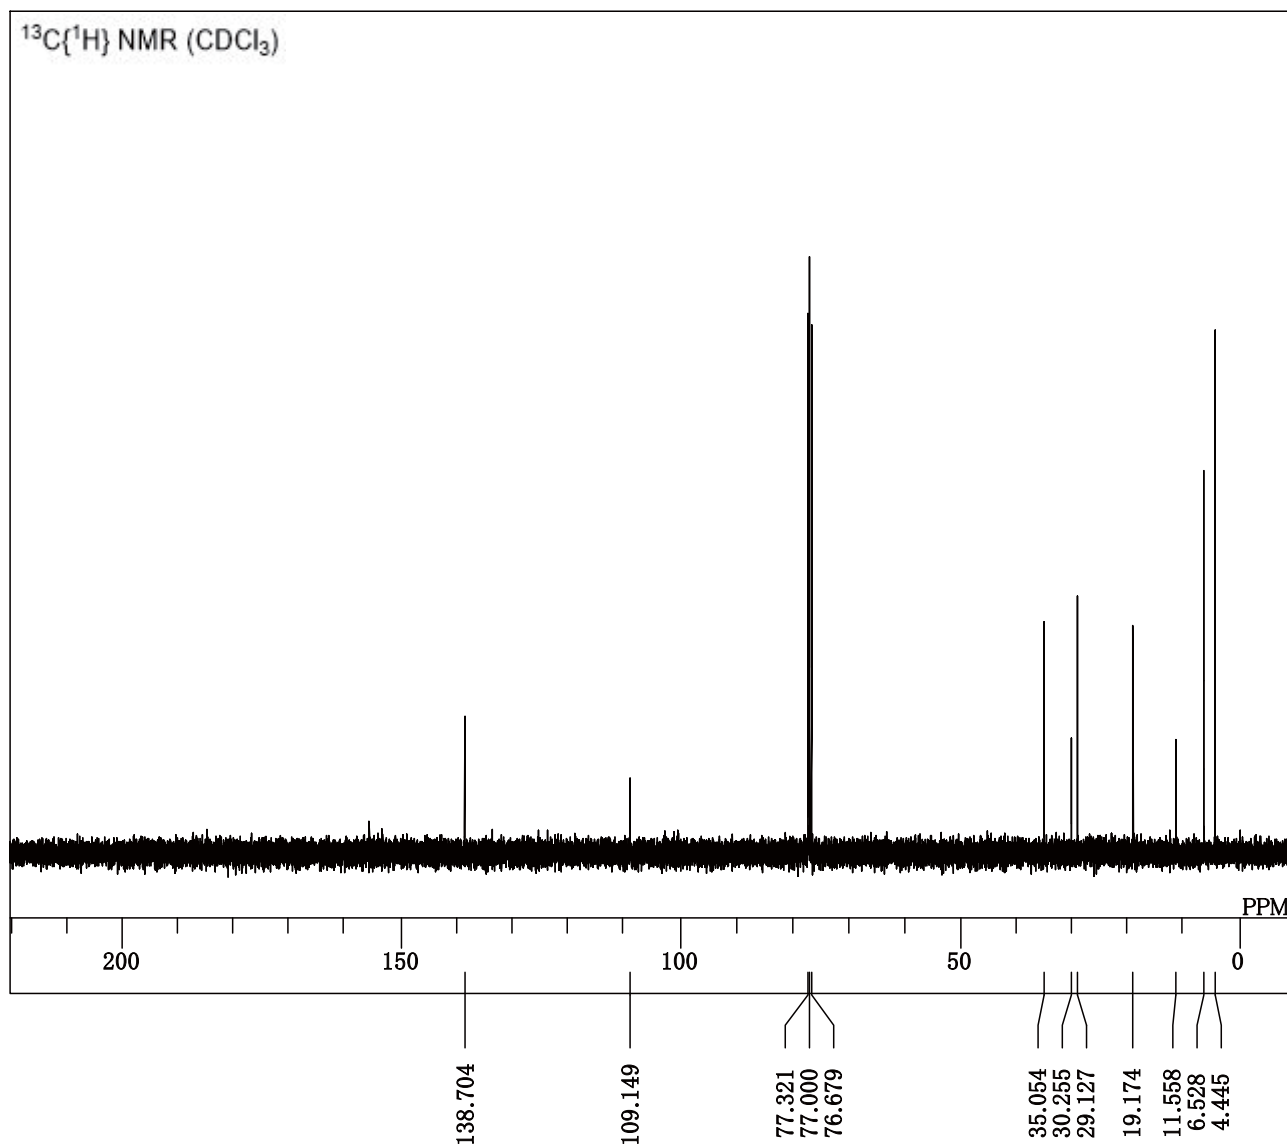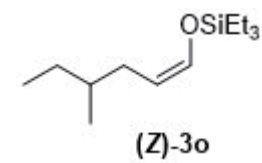

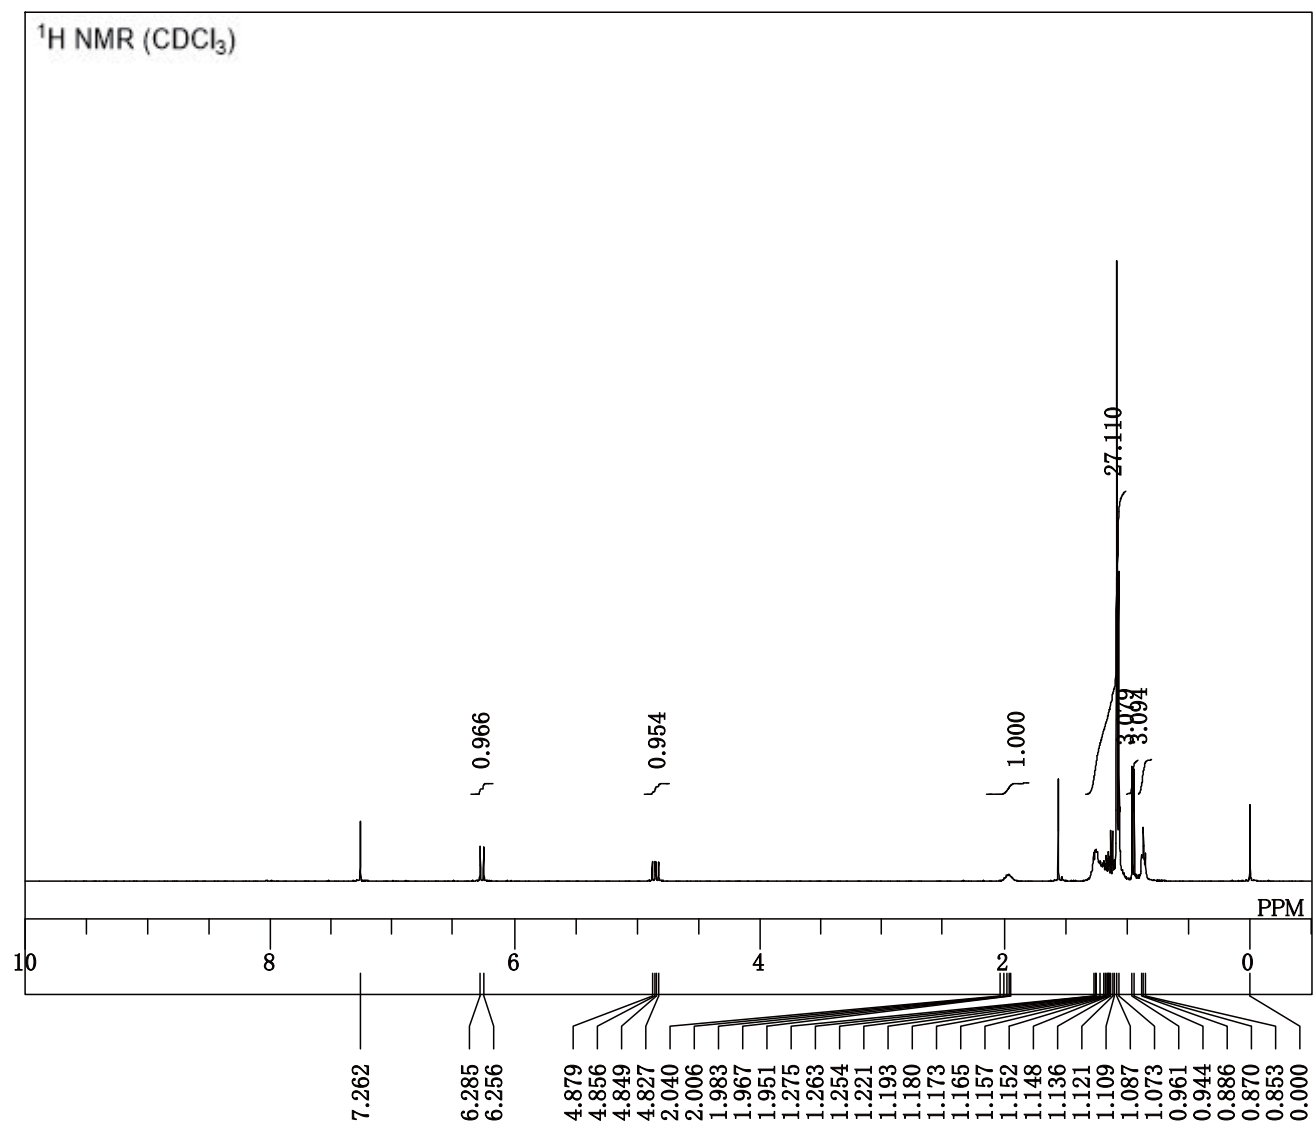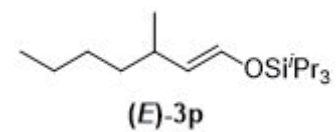



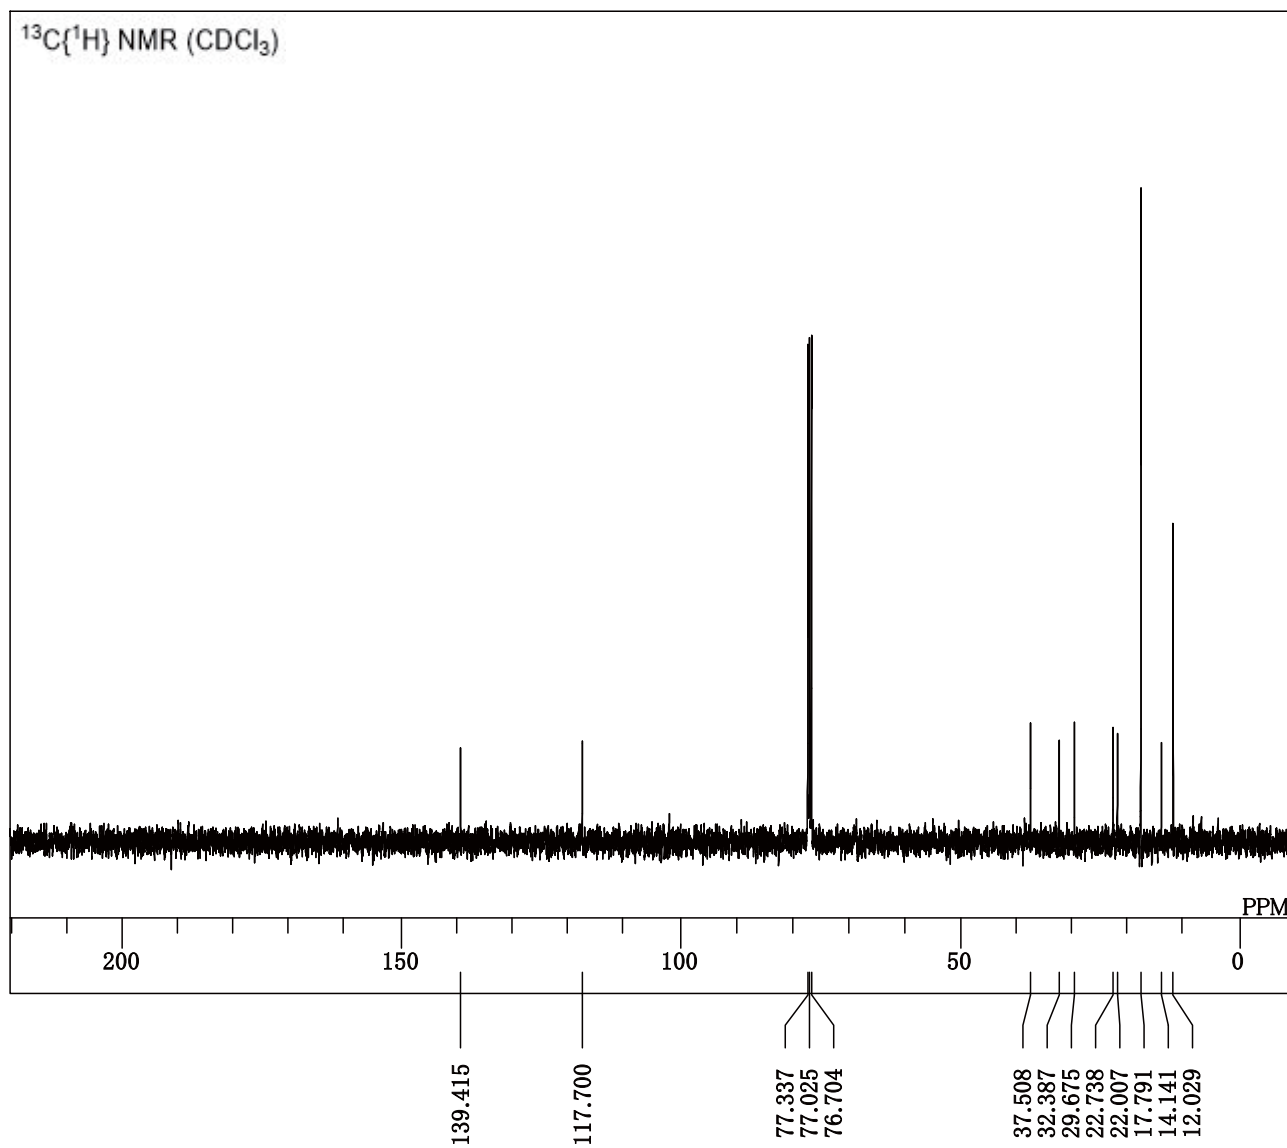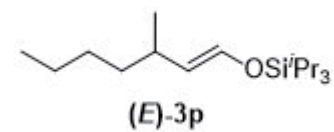

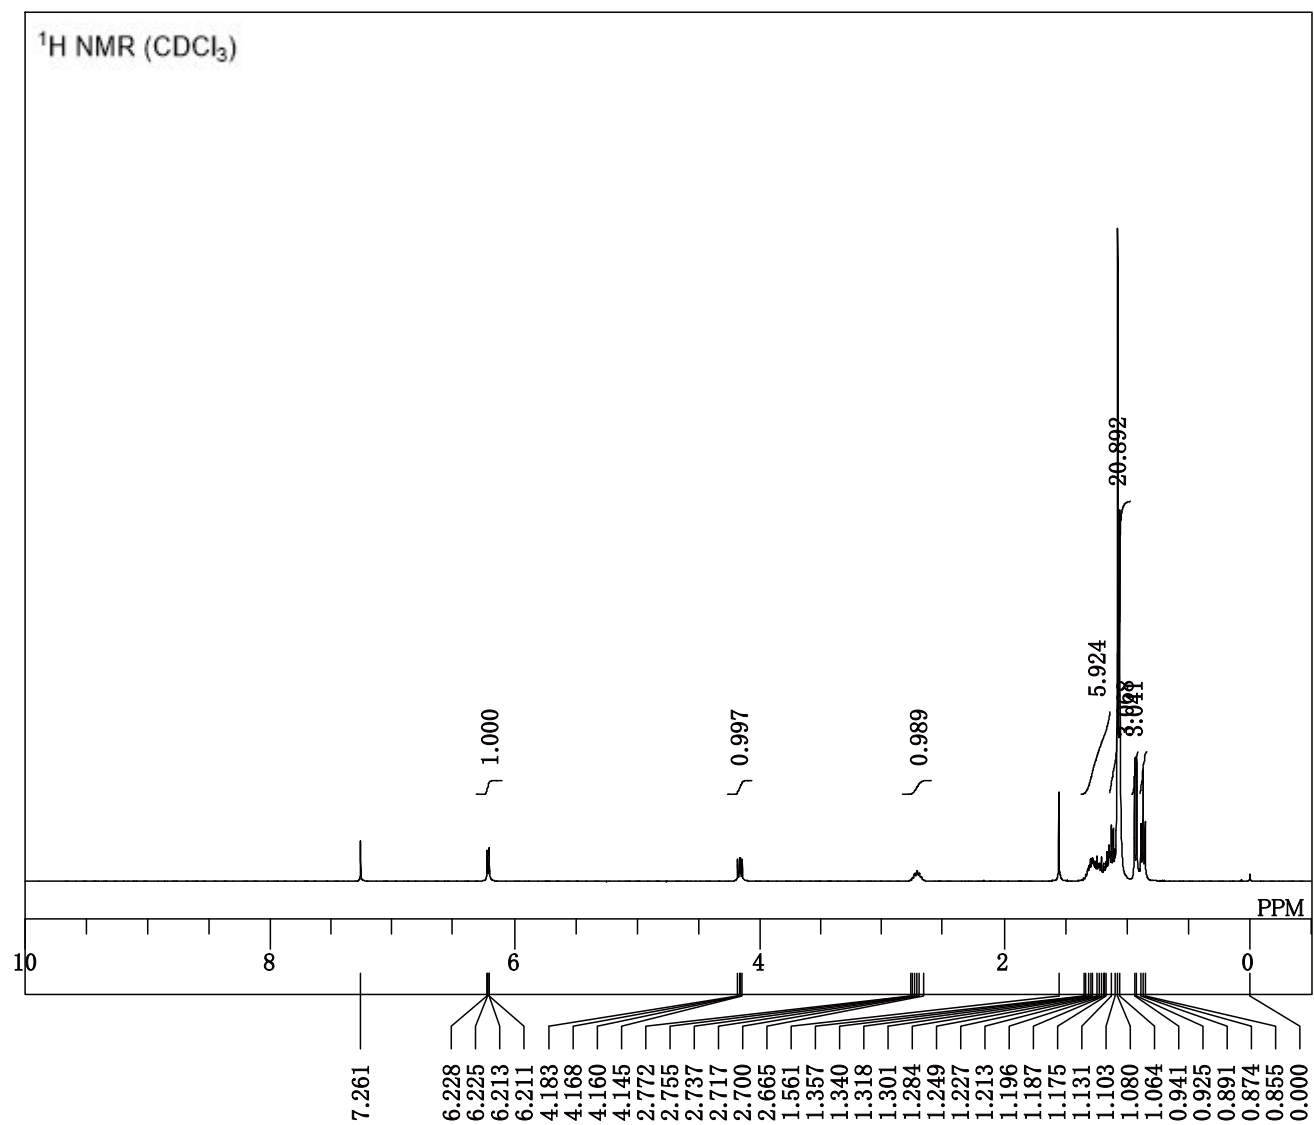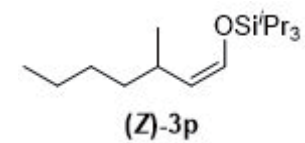

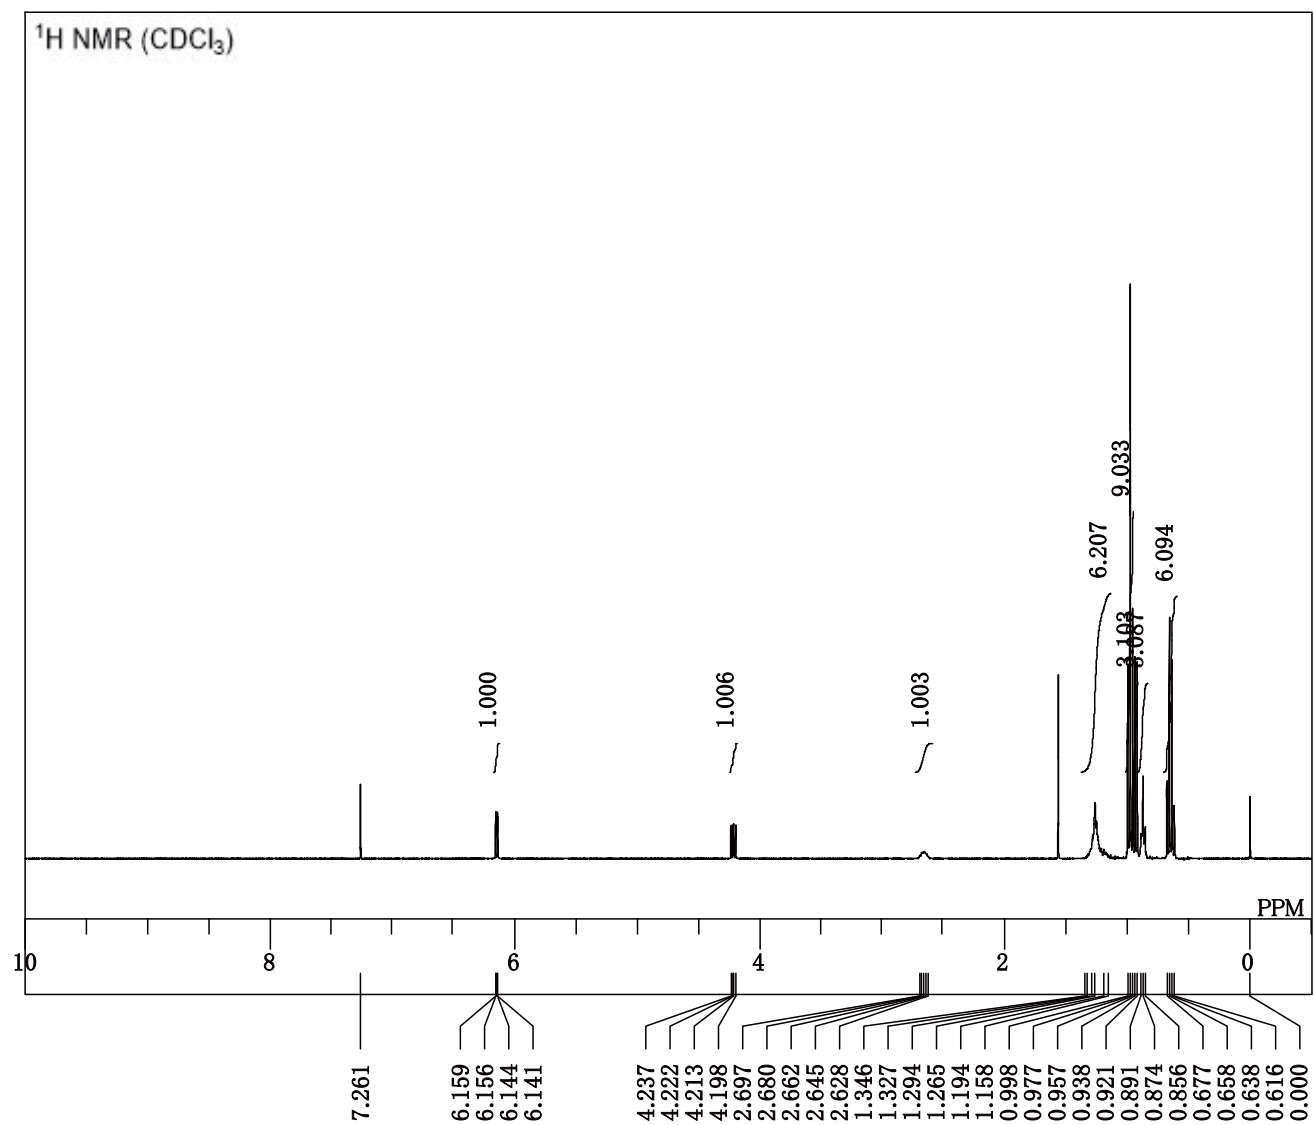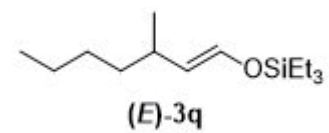

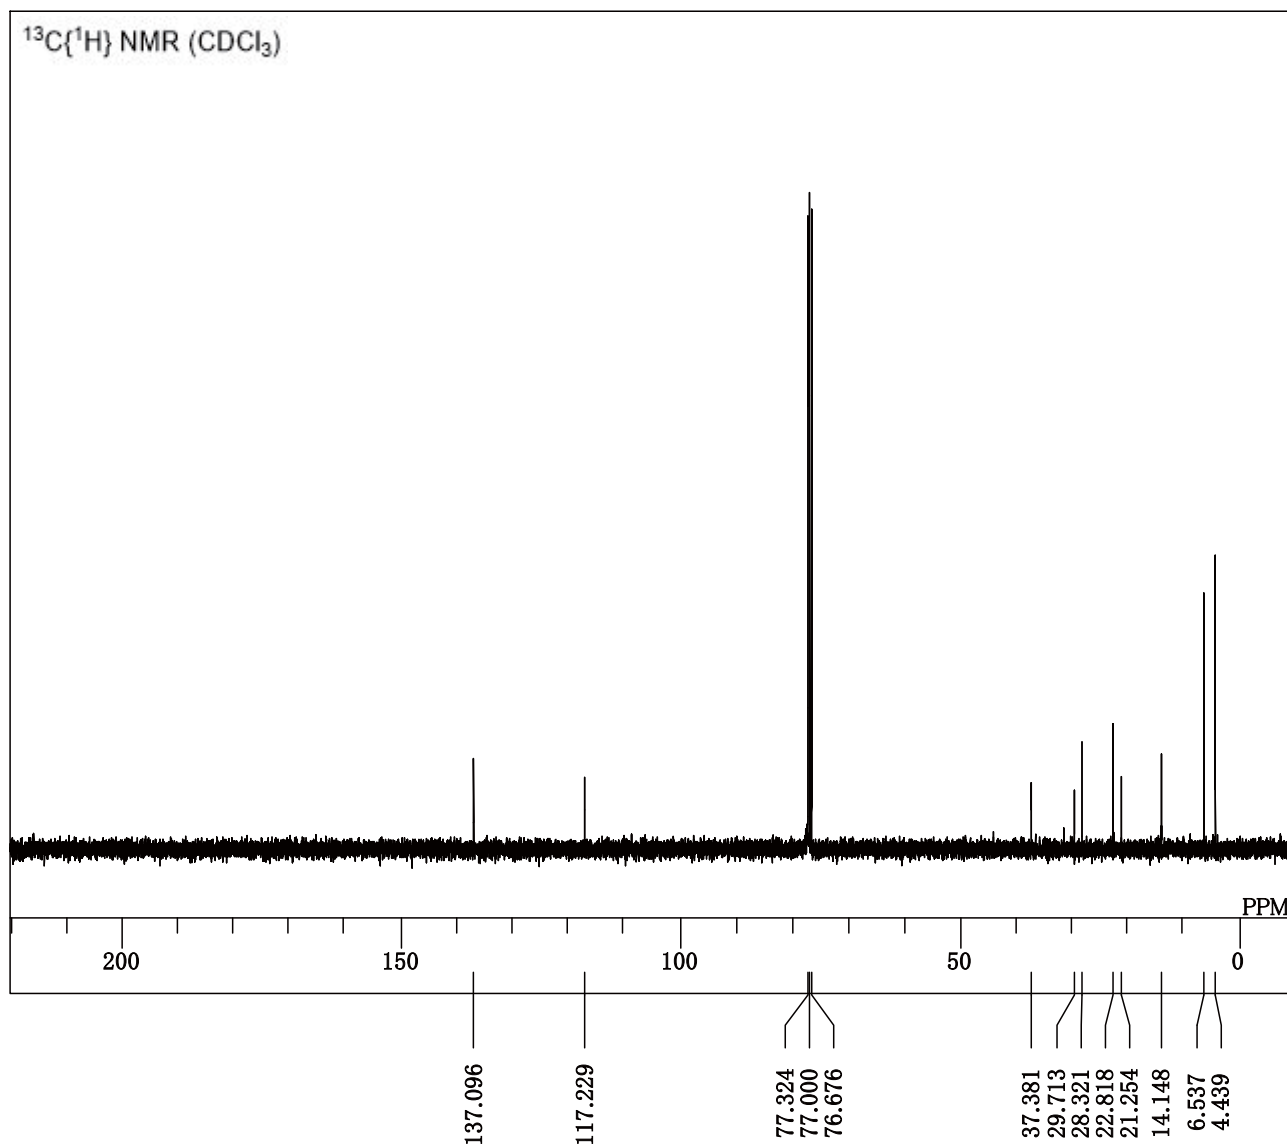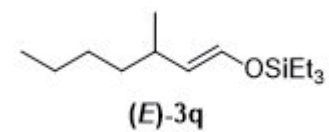

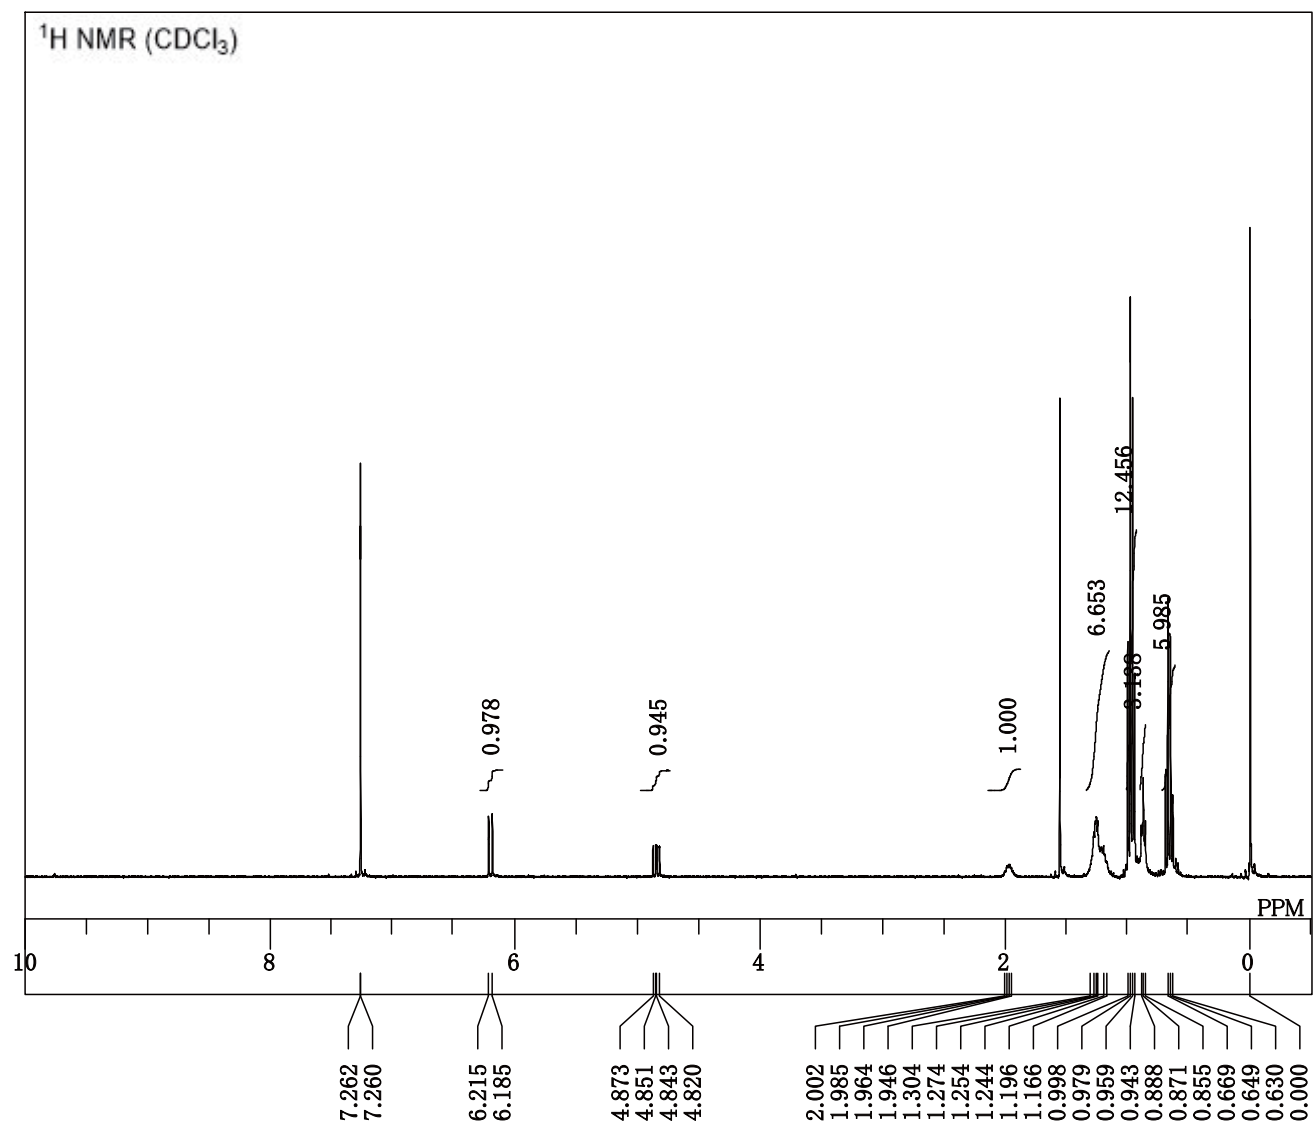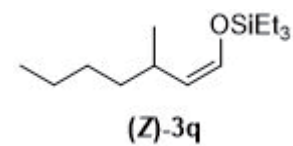

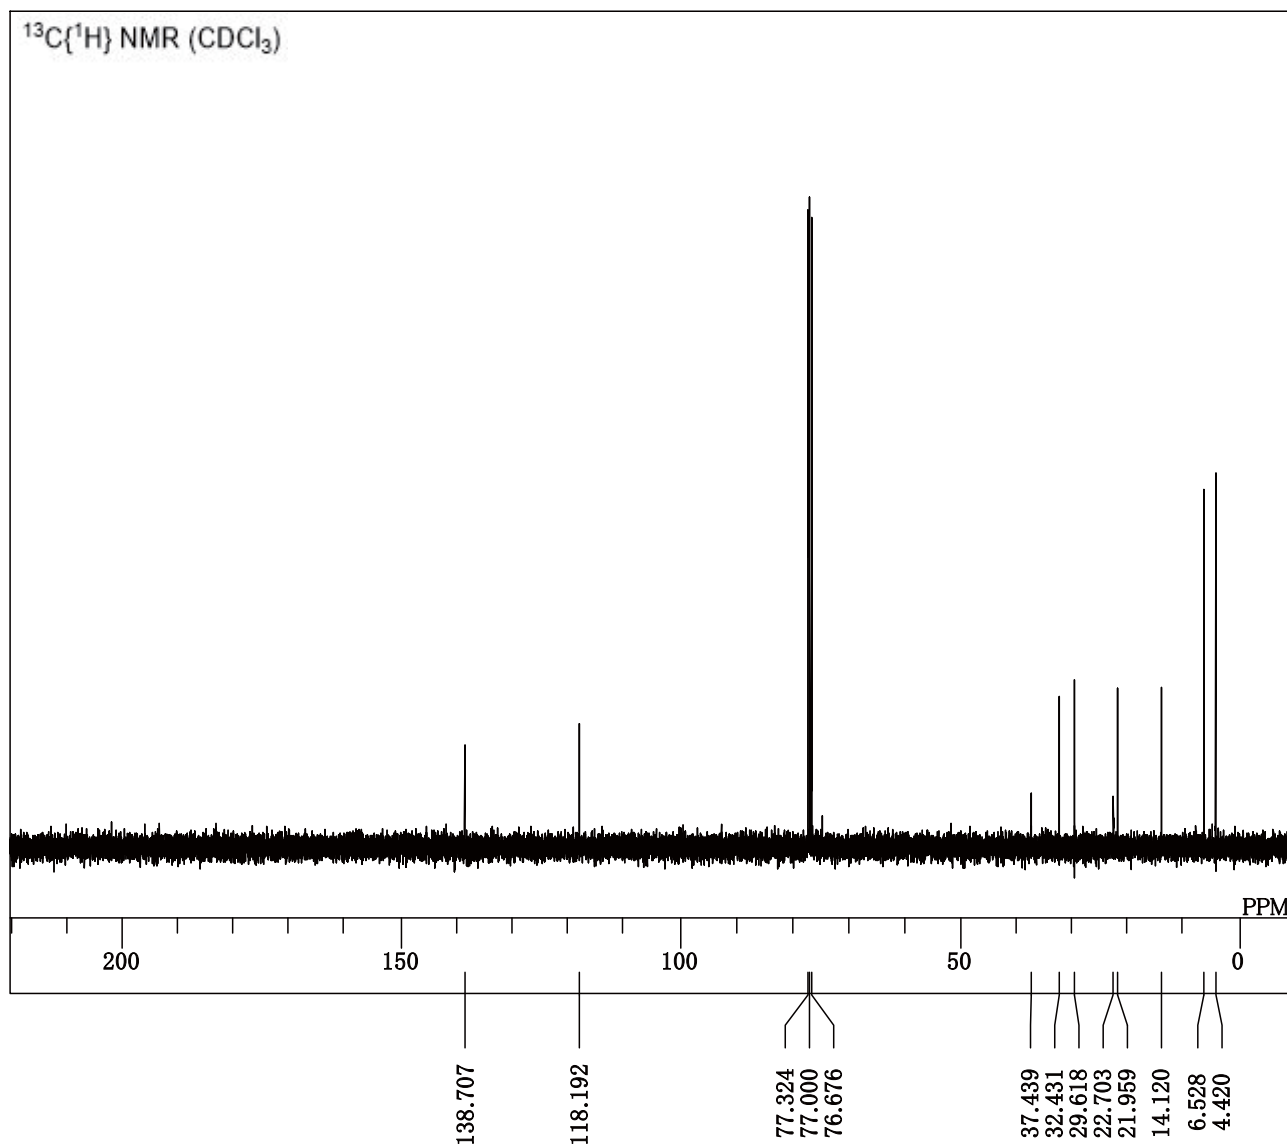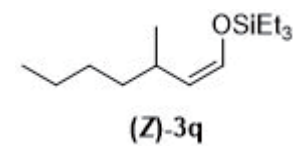

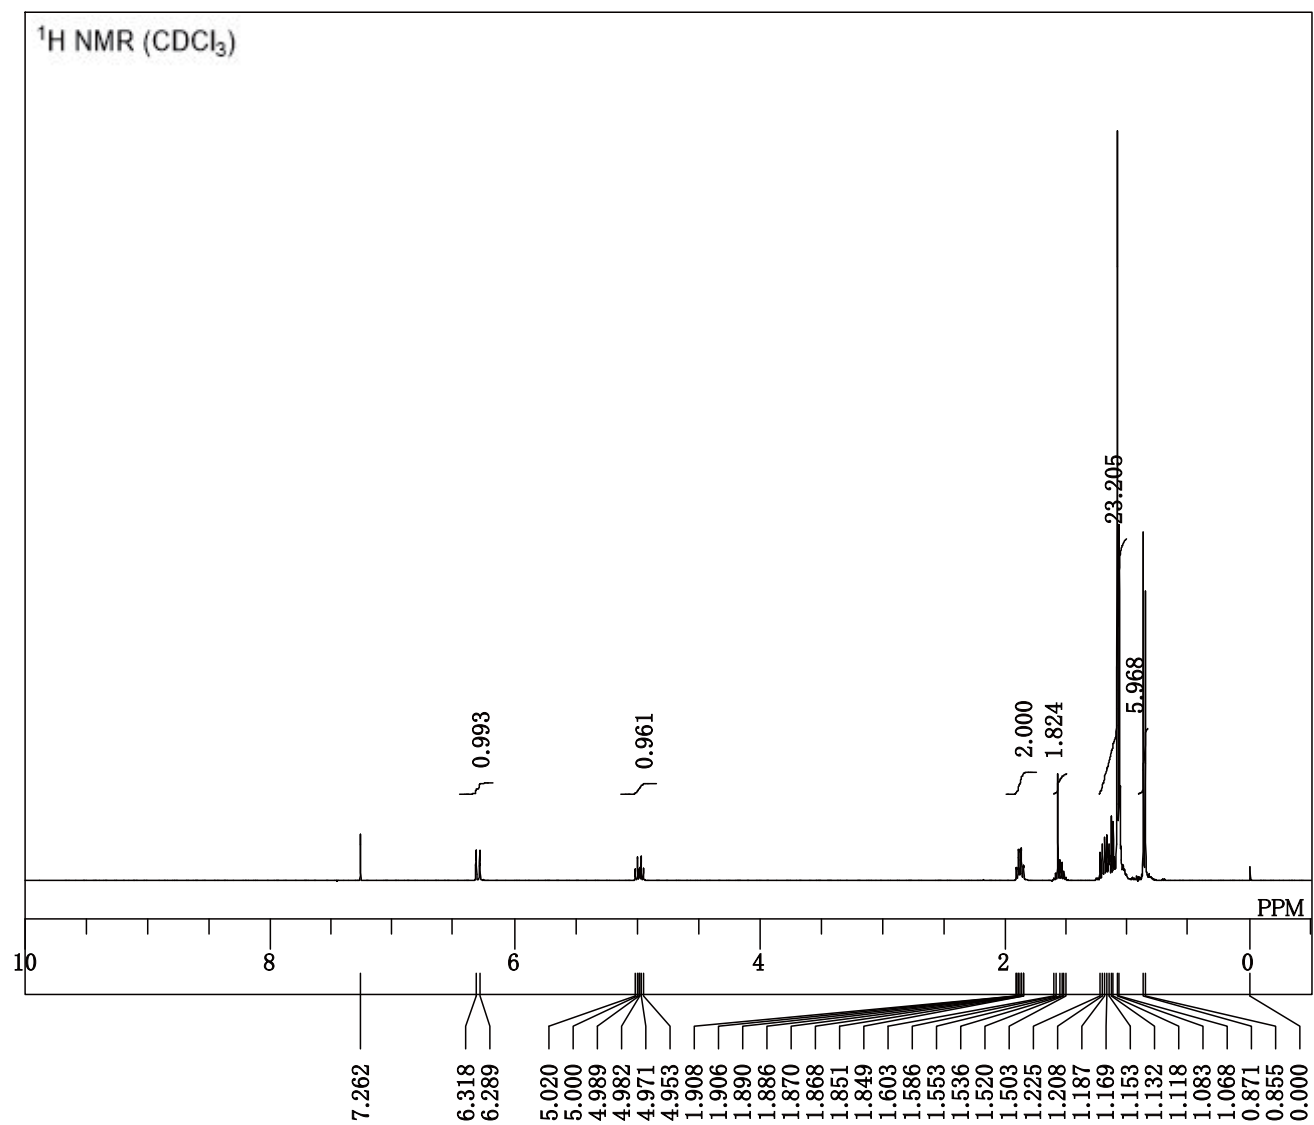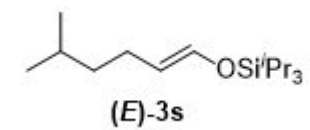

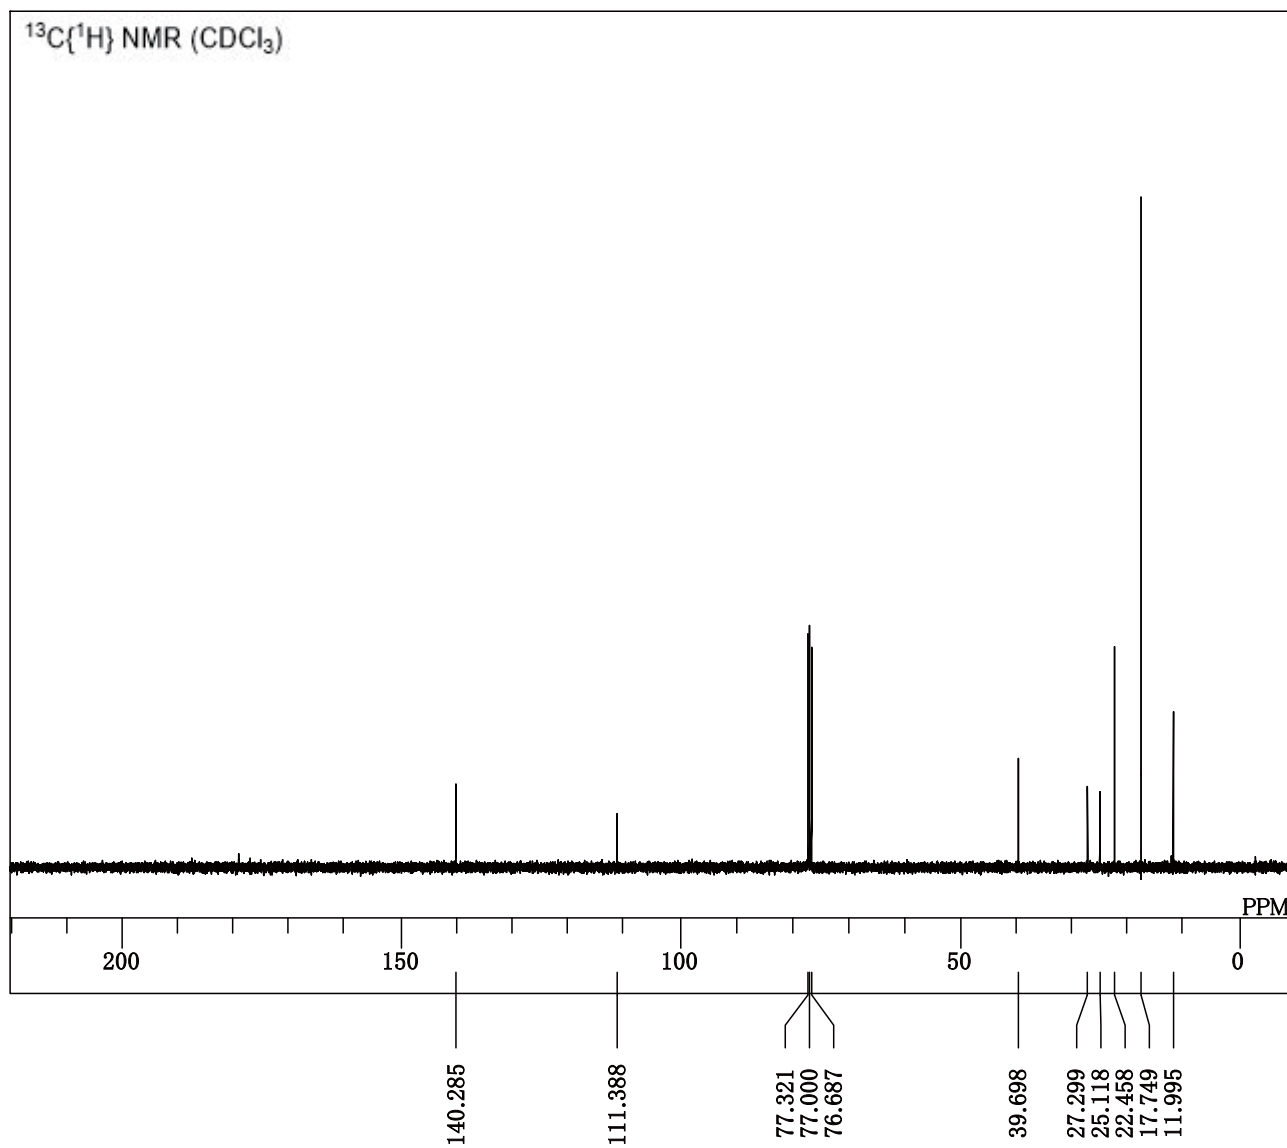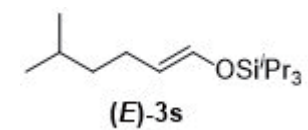



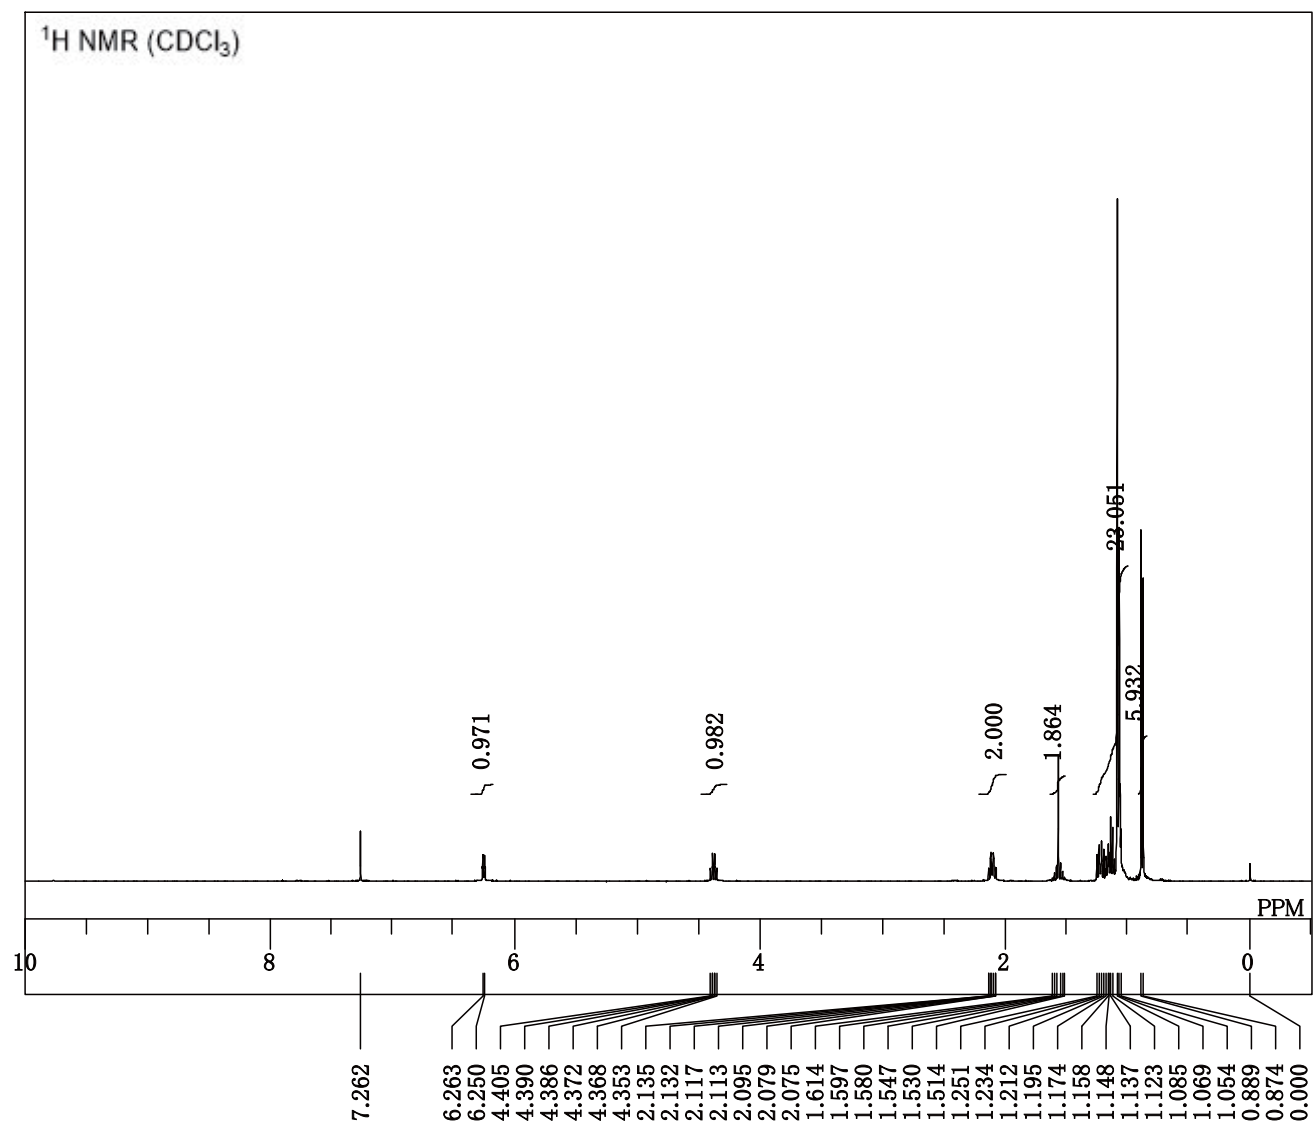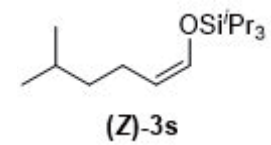

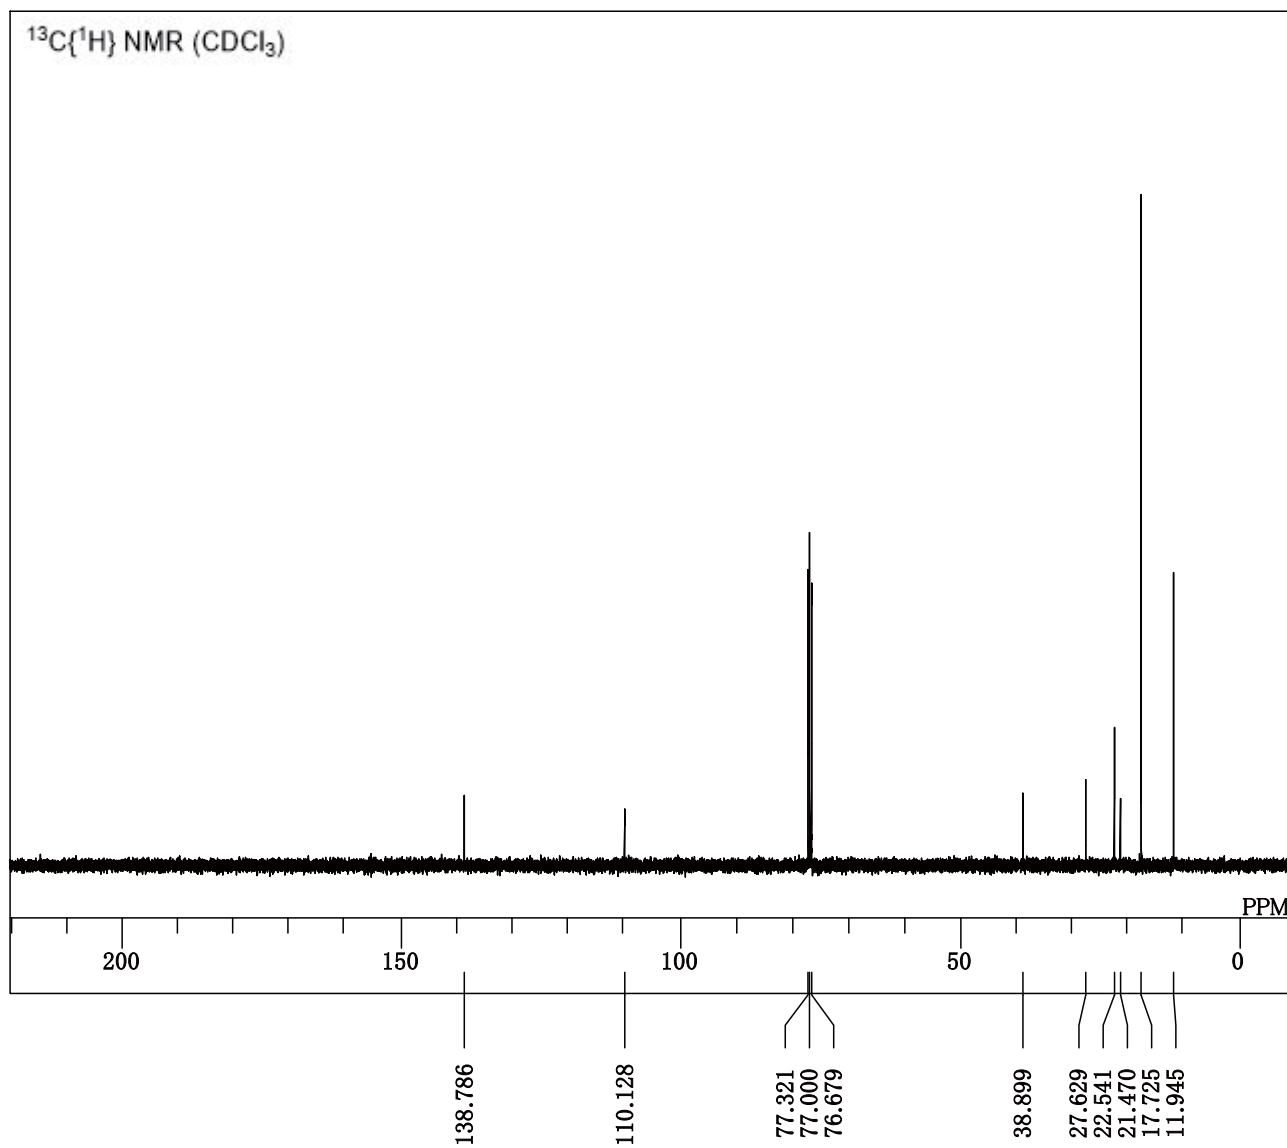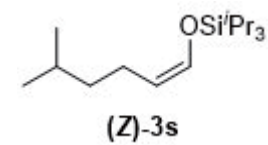

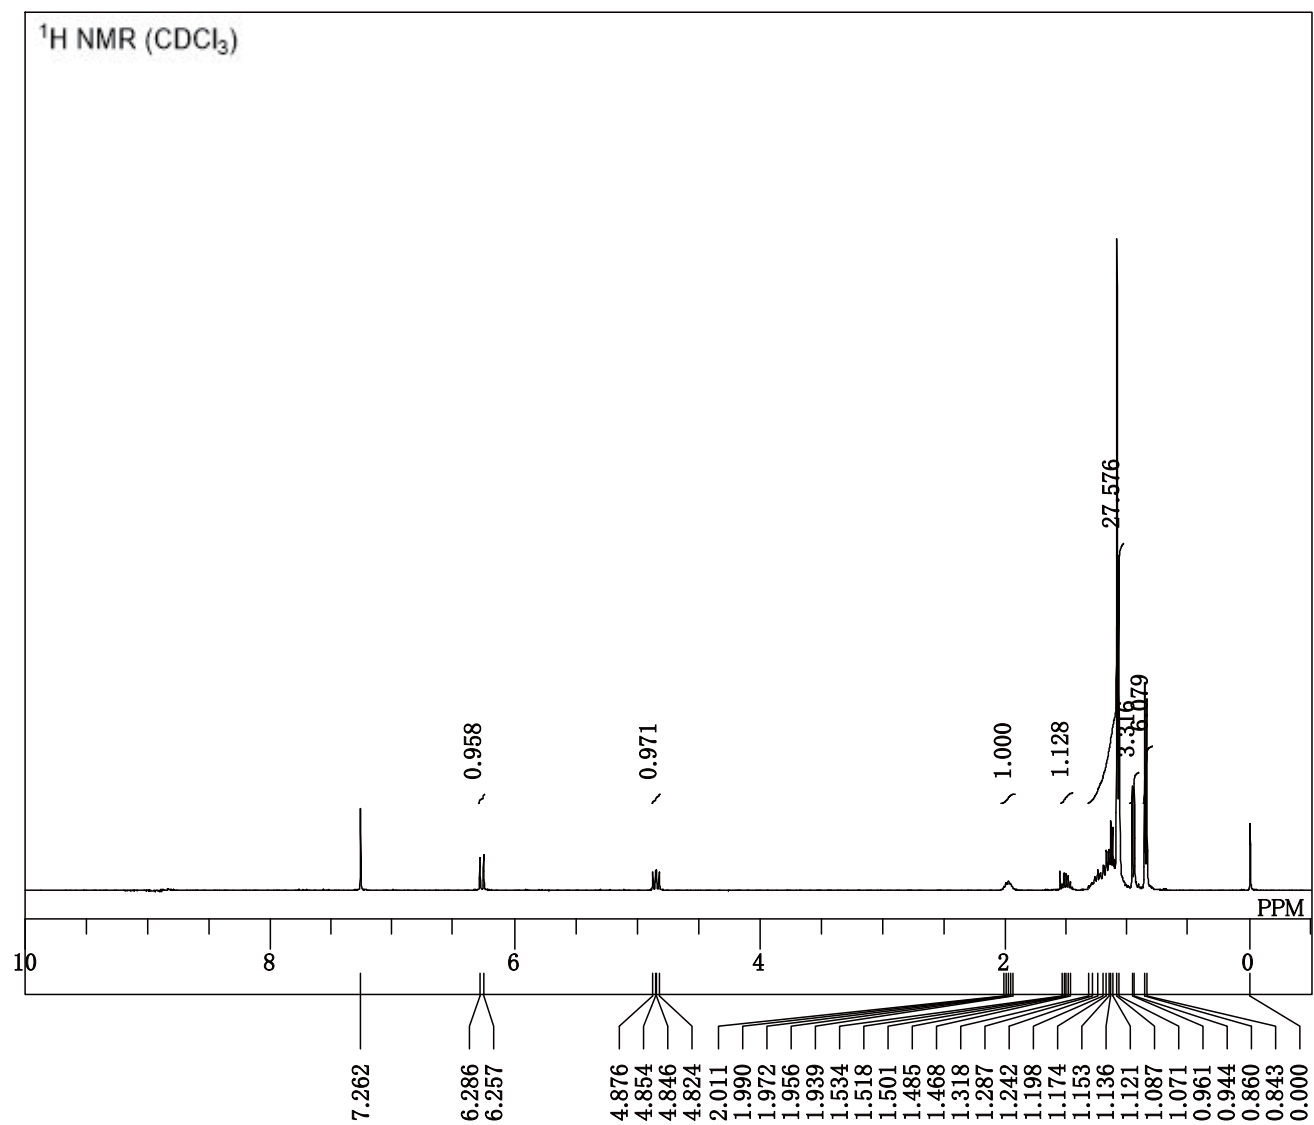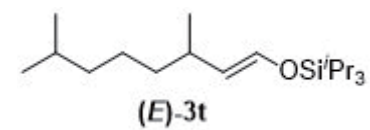

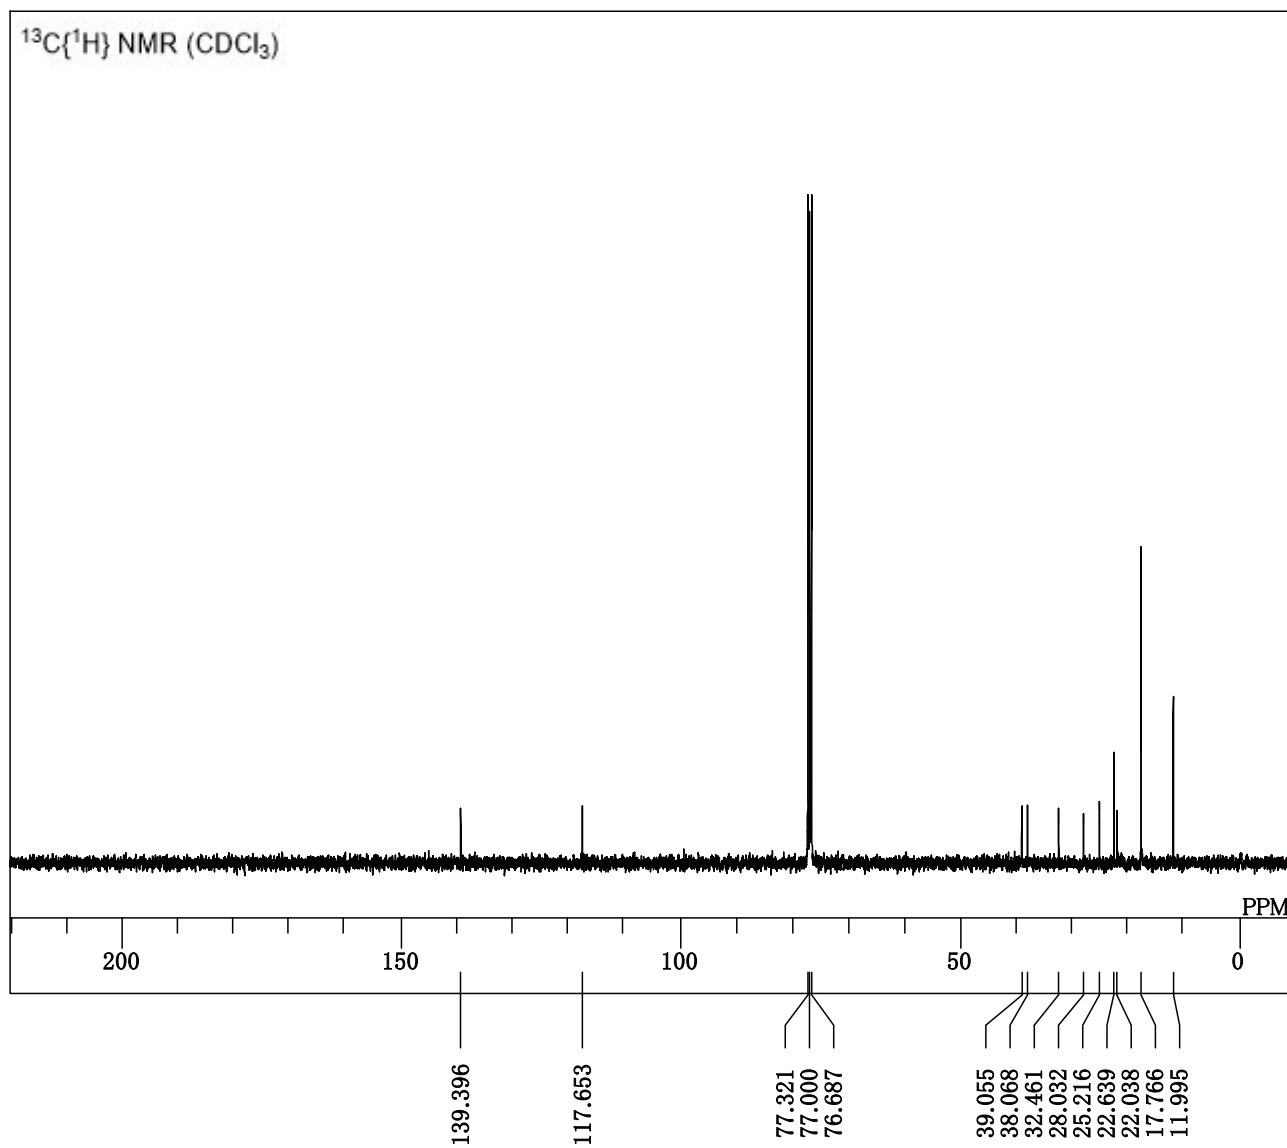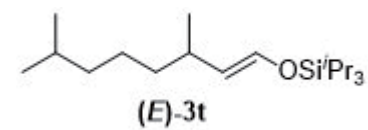

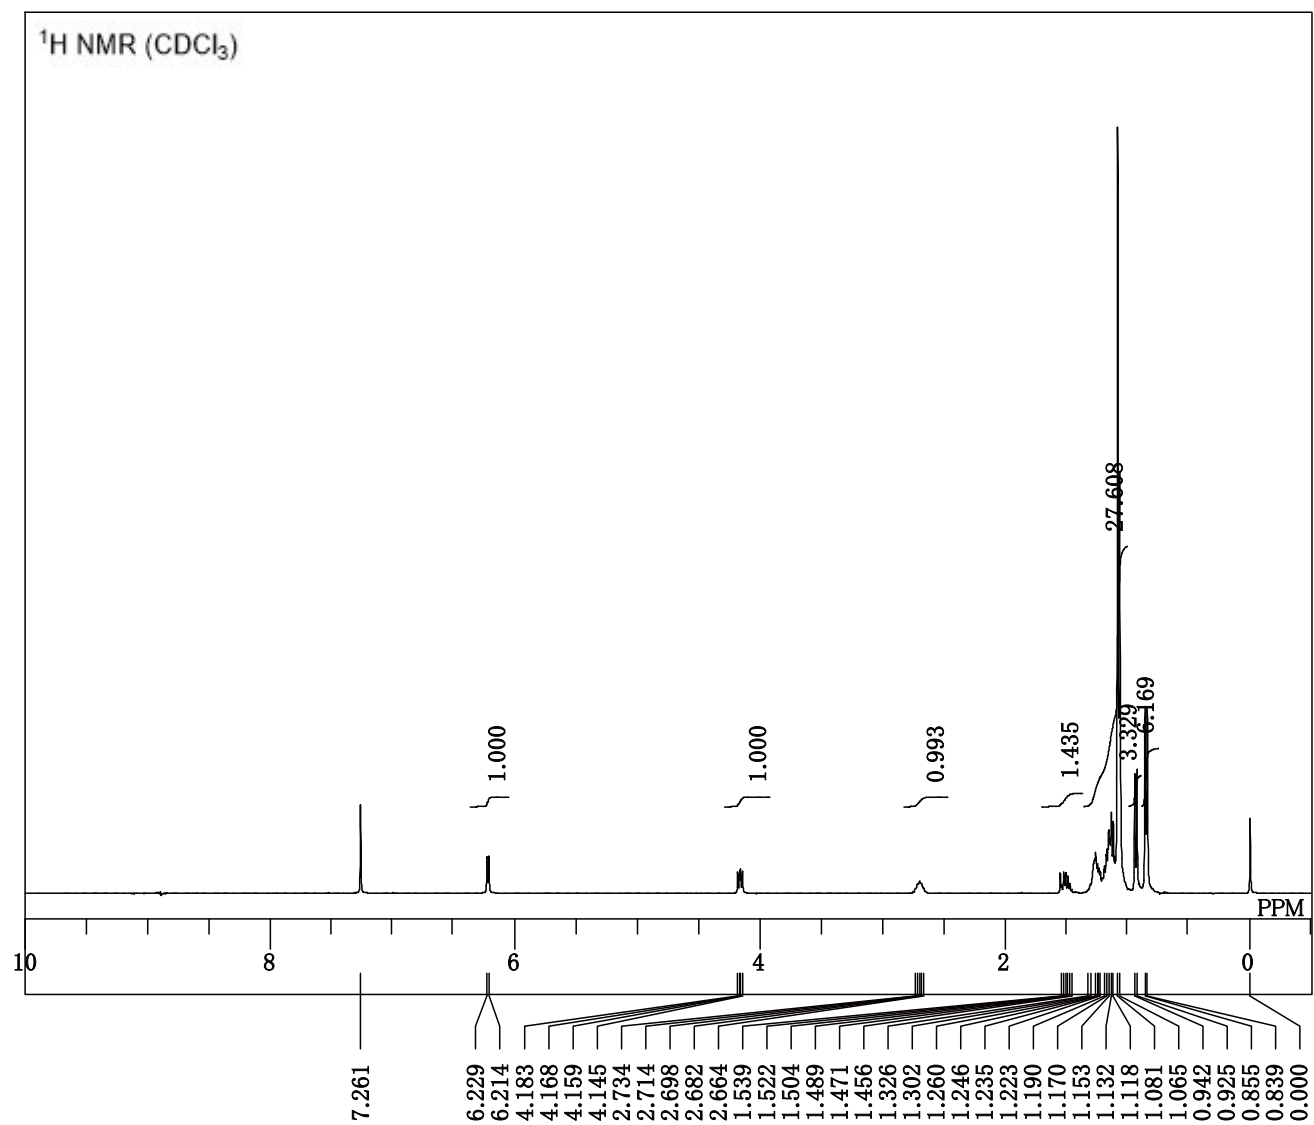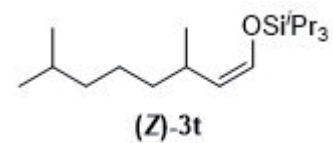

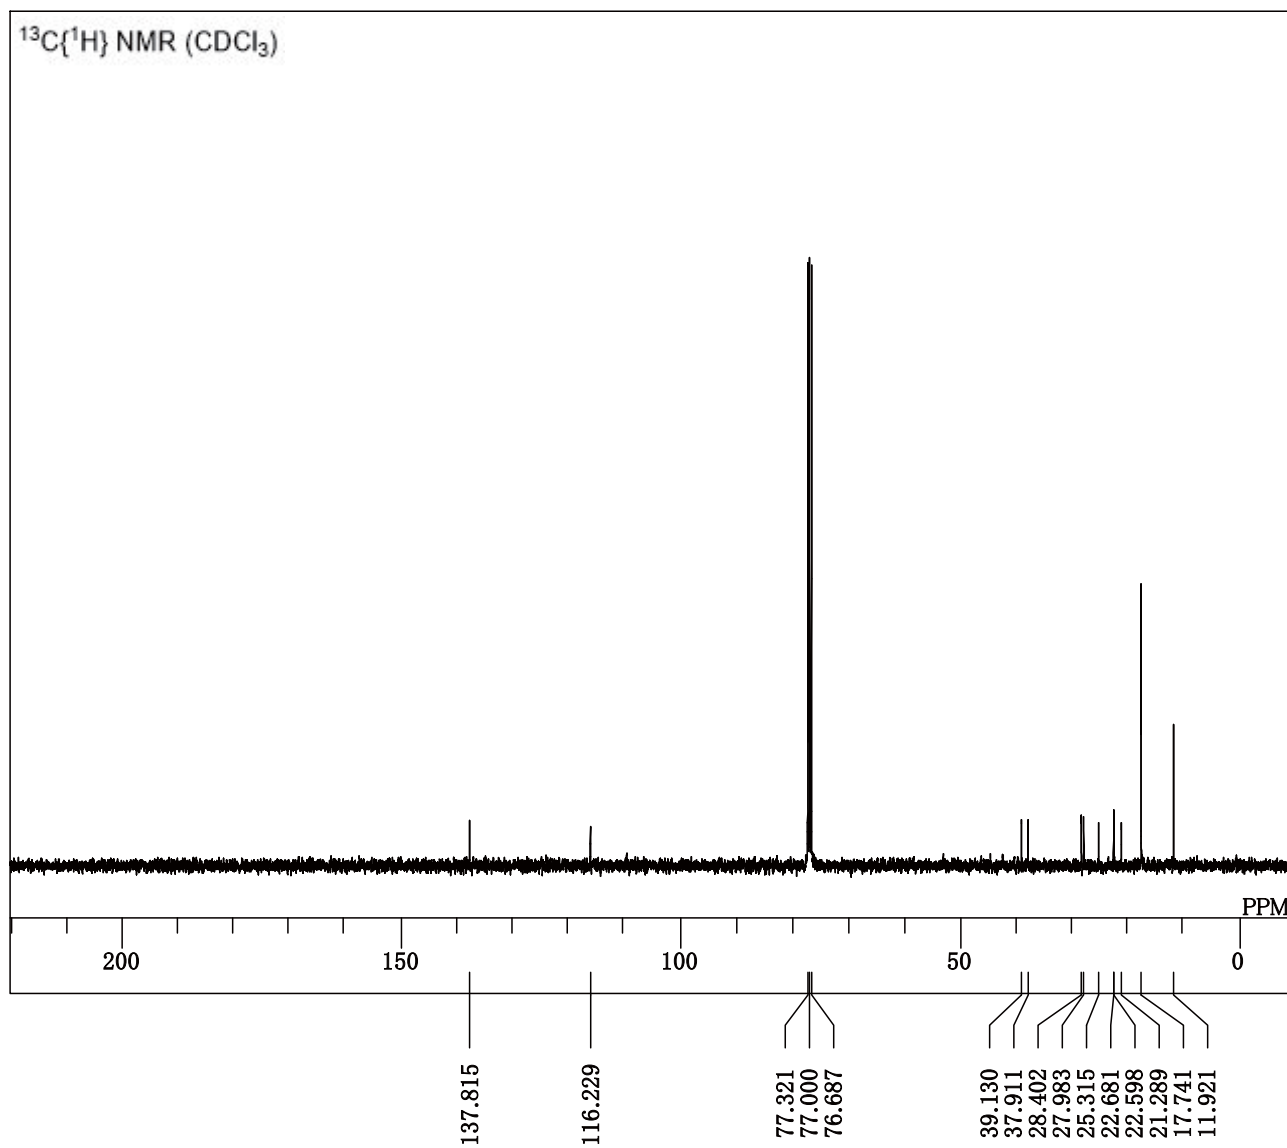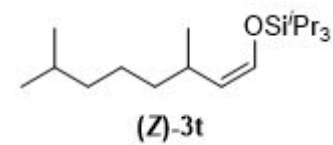

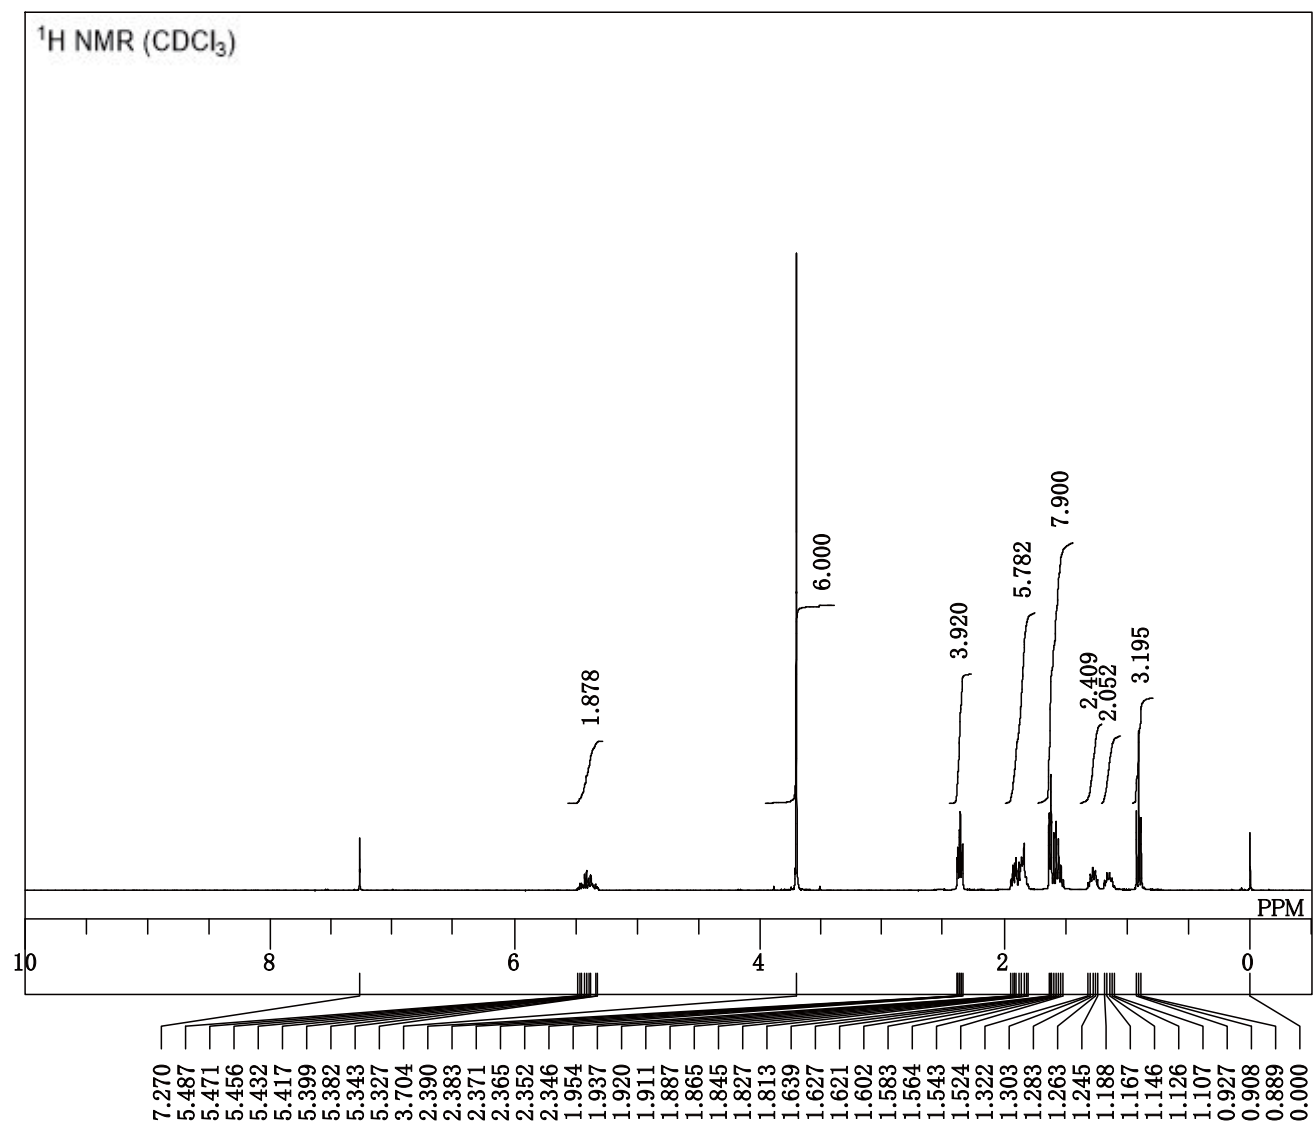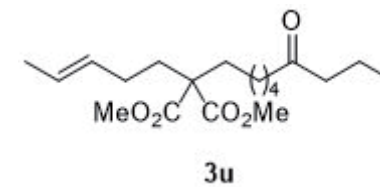

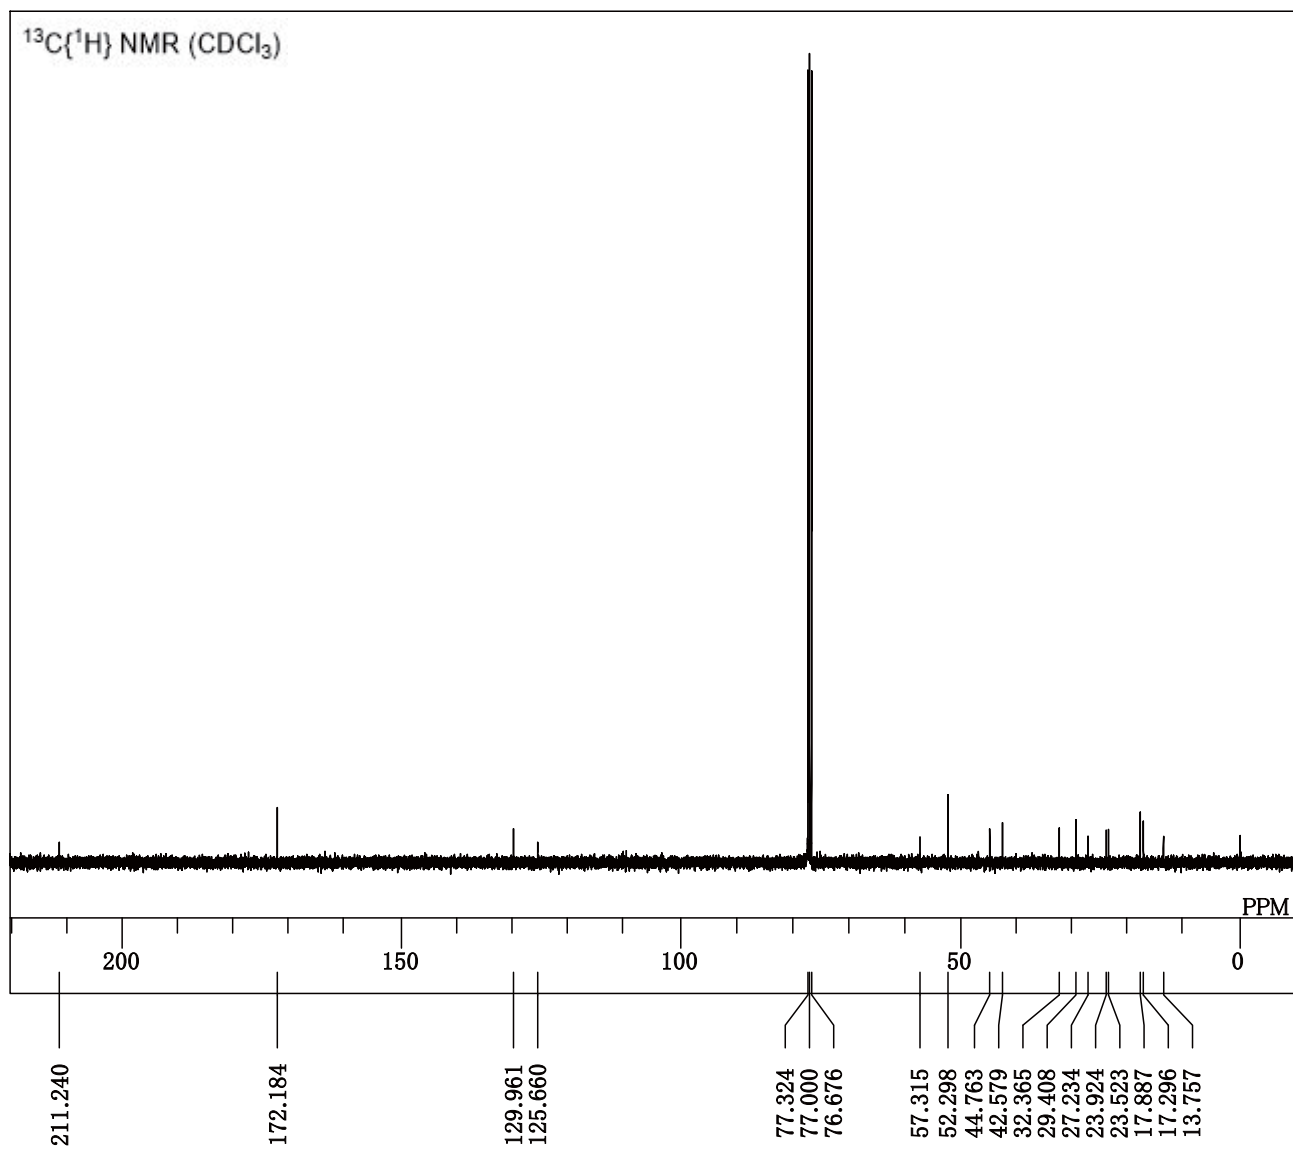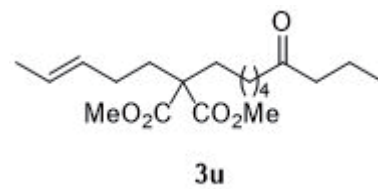



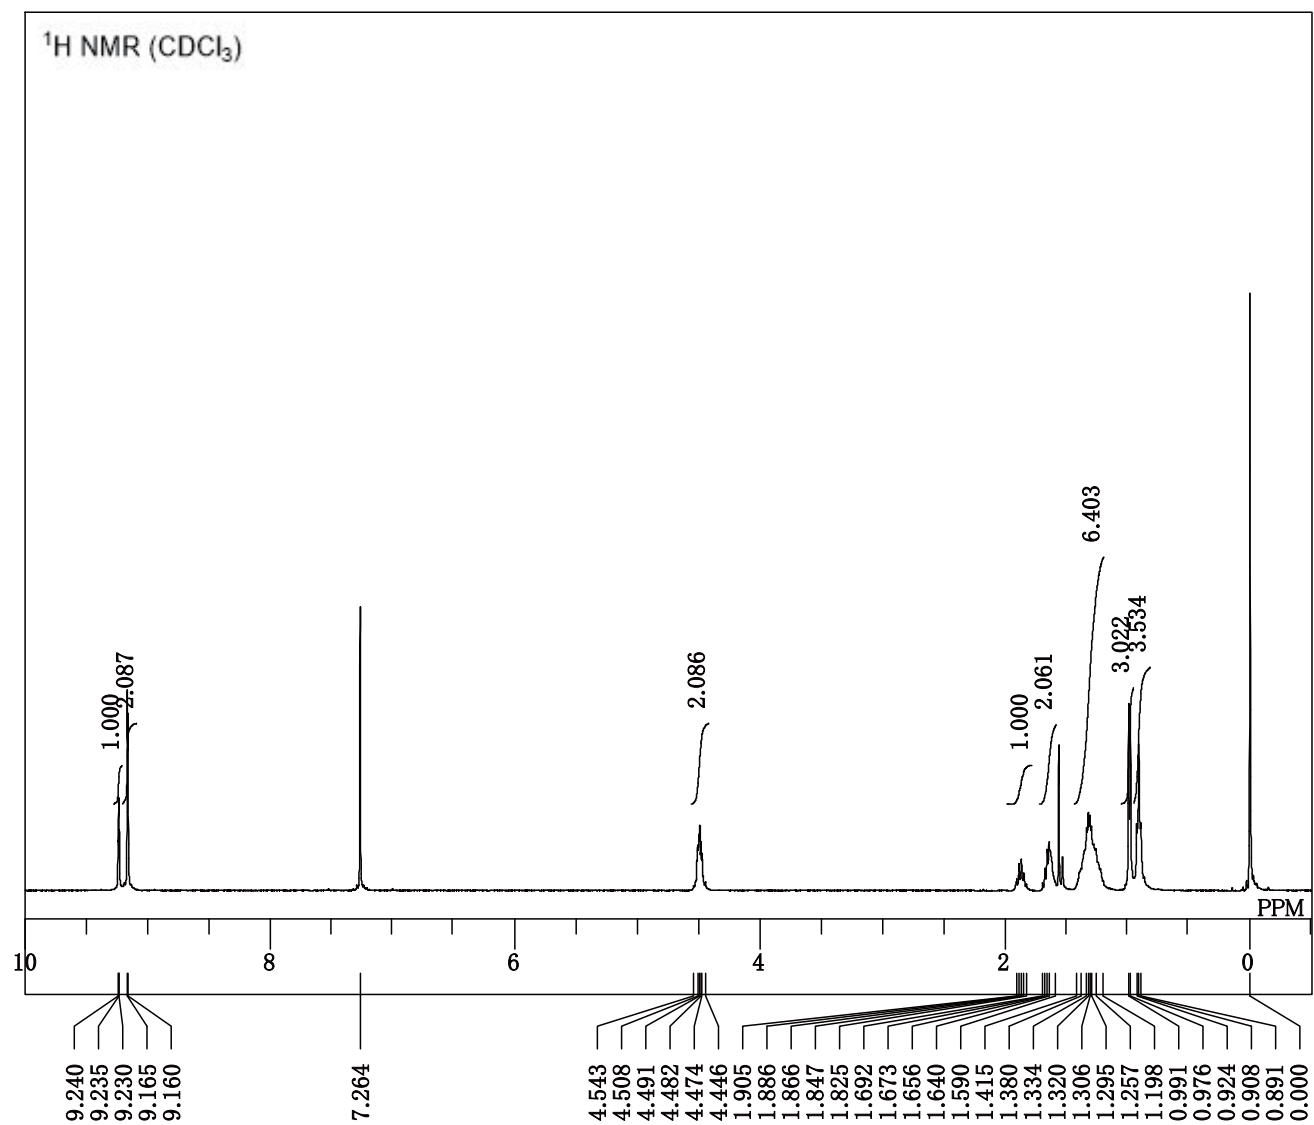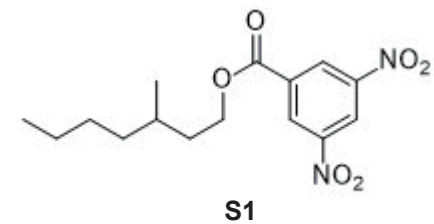

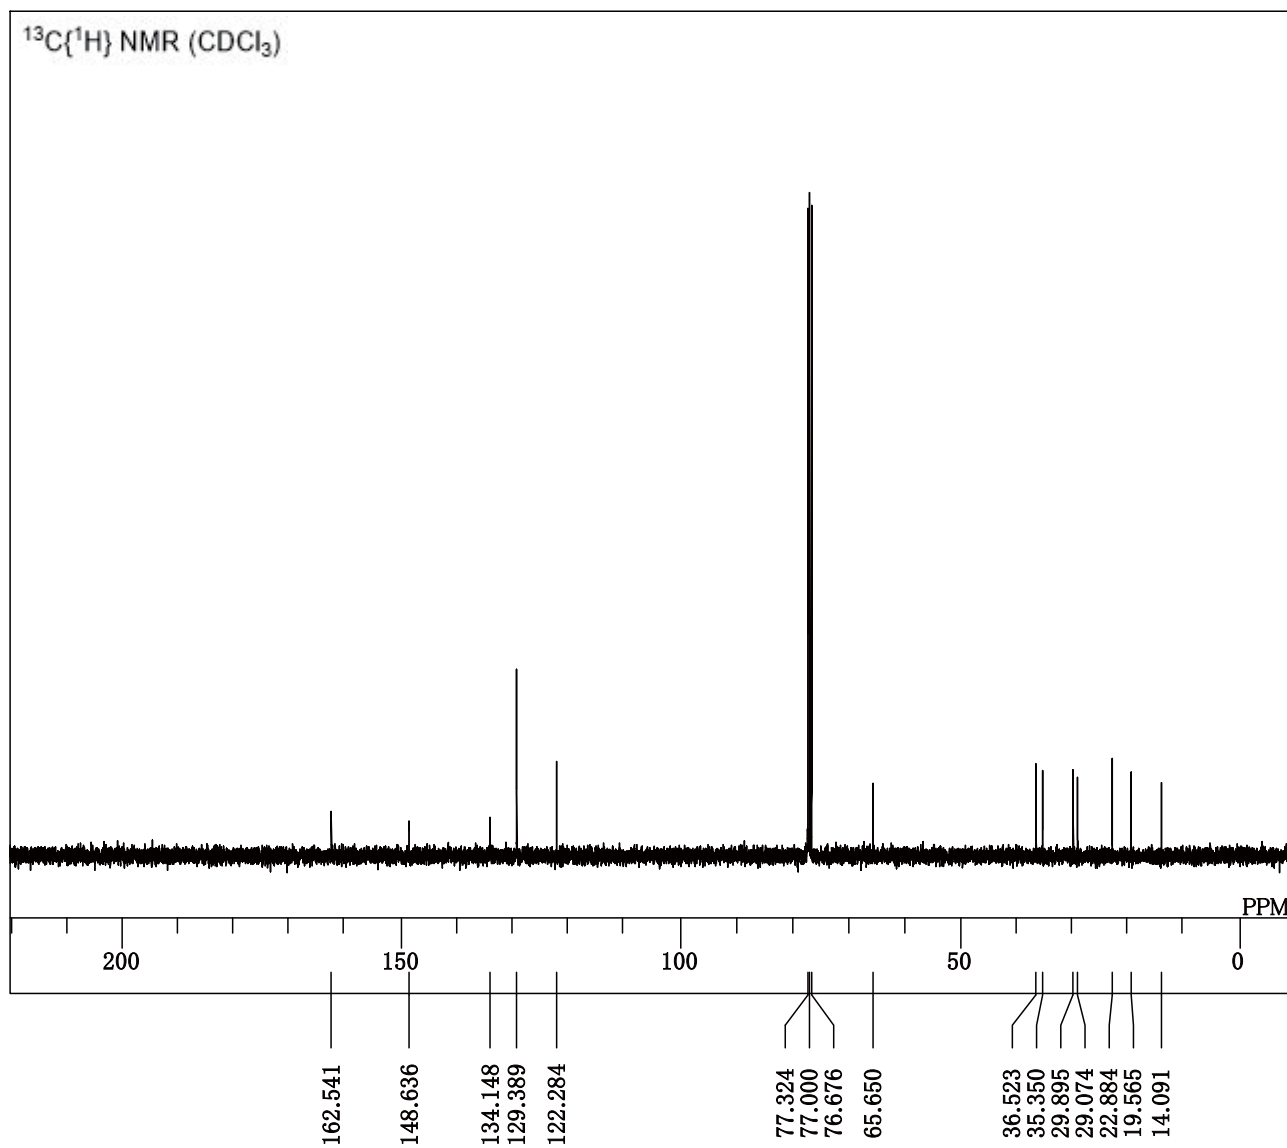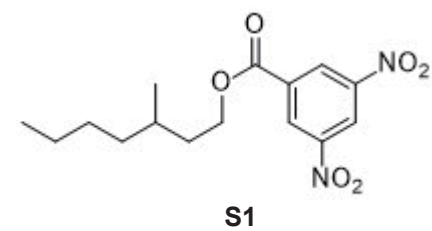

Supplement: Supplementary file 1 [file 12560213]
